# Supplementary material for: A chiral fluorescent Ir(iii) complex that targets the GPX4 and ErbB pathways to induce cellular ferroptosis
Source: Royal Society of Chemistry journal article supplement (doi:10.1039/d2sc06171f), 2023-01-01
Supplement: d2sc06171f1.pdf [file d2sc06171f1.pdf]

## SUPPORTING INFORMATION

---

### **A Chiral Fluorescent Ir(III) Complex that Targets the GPX4 and ErbB Pathways to Induce Cellular Ferroptosis**

Xinyang Zhao<sup>a†</sup>, Jingyi Zhang<sup>a†</sup>, Wei Zhang<sup>b</sup>, Zijian Guo<sup>a</sup>, Wei Wei<sup>b\*</sup>, Xiuxiu Wang<sup>a\*</sup>, Jing Zhao<sup>a\*</sup>

## Table of Contents

|                                                                                                                          |    |
|--------------------------------------------------------------------------------------------------------------------------|----|
| Table of Contents .....                                                                                                  | 2  |
| Experimental Procedures.....                                                                                             | 3  |
| General information .....                                                                                                | 3  |
| Synthetic procedures .....                                                                                               | 3  |
| Synthesis of Ir(III) intermediate ( $[\text{IrH}_2(\text{PPh}_3)_2(\text{C}_3\text{H}_6\text{O})_2]\text{SbF}_6$ ):..... | 3  |
| Synthesis of <b>L1</b> and <b>L2</b> : .....                                                                             | 4  |
| Synthesis of <b>L3</b> and <b>L4</b> : .....                                                                             | 4  |
| General method for synthesizing Ir-Py-RSL: .....                                                                         | 5  |
| High performance liquid chromatography (HPLC).....                                                                       | 7  |
| Circular dichroism (CD) spectra detection.....                                                                           | 7  |
| Partition Coefficient, log P .....                                                                                       | 7  |
| Cellular uptake measurement .....                                                                                        | 7  |
| Cytotoxicity and cell viability.....                                                                                     | 7  |
| Cell death pattern.....                                                                                                  | 7  |
| Cellular ROS and lipid peroxidation.....                                                                                 | 8  |
| Quantitative RT-PCR .....                                                                                                | 8  |
| Western Blot experiments .....                                                                                           | 8  |
| Mitochondrial Morphology Analysis .....                                                                                  | 8  |
| Fluorescence detection .....                                                                                             | 8  |
| UV-Vis spectra detection .....                                                                                           | 8  |
| Intracellular localization monitoring and organelle colocalization imaging.....                                          | 9  |
| Quantification of iridium content in organelles .....                                                                    | 9  |
| Label-free quantitative proteomics profiling .....                                                                       | 9  |
| Toxicity tests <i>in vivo</i> .....                                                                                      | 9  |
| Anti-tumor experiments <i>in vivo</i> .....                                                                              | 10 |
| Supporting Figures and Tables .....                                                                                      | 11 |
| References.....                                                                                                          | 62 |

## Experimental Procedures

### General information

All anhydrous solvents were bought from J&K Scientific and all reactants and reagents were obtained from Bide Pharm, Energy Chemical, Laajoo and Adamas and used as received unless otherwise specified.  $^1\text{H}$  NMR,  $^{13}\text{C}$  NMR, and  $^{31}\text{P}$  NMR spectra were obtained on Bruker nuclear resonance (400 MHz) spectrometer. Chemical shifts ( $\delta$ ) are expressed in ppm relative to tetramethylsilane (TMS). The residual solvent signals were used as references and the chemical shifts converted to TMS scale. High resolution mass spectra (HRMS) were obtained by ESI on a quadrupole-orbitrap mass spectrometer (QExactive, ThermoFisher Scientific). Fluorescence spectra were conducted on a Shimadzu RF-6000 spectrofluorophotometer. High performance liquid chromatography (HPLC) analysis was performed on a Shimadzu SPD-20A. UV-Vis spectra were conducted on a Shimadzu UV-1800 spectrophotometer. Circular dichroism (CD) spectra were conducted on a Jasco J-810 spectropolarimeter.

Human fibrosarcoma cells (HT-1080), human pancreatic cancer (PANC-1), human lung fibroblasts (HLFs), and human embryonic kidney 293T (HEK-293T) cells were purchased from American Type Culture Collection (Manassas, VA). All the cell lines were authenticated by using STR typing and confirmed to be mycoplasma-free by KeyGEN BioTECH Co., Ltd. (Nanjing, China). All cells were cultured in DMEM (Gibco) containing 10% FBS (Gibco), 100 units/ml penicillin, and 50 units/ml streptomycin at 37 °C in a CO<sub>2</sub> incubator (95% relative humidity, 5% CO<sub>2</sub>). Female BALB/c mice (6–8 weeks) were obtained from the Model Animal Research Center of Nanjing University and maintained under protocols approved by Nanjing University Laboratory Animal Center. All animal studies were performed in accordance with the Guidelines for the Care and Use of Laboratory Animals of the Chinese Animal Welfare Committee and approved by The Institutional Animal Care and Use Committee (Nanjing University, IACUC-2109009).

### Synthetic procedures

#### Synthesis of Ir(III) intermediate ( $[\text{IrH}_2(\text{PPh}_3)_2(\text{C}_3\text{H}_6\text{O})_2]\text{SbF}_6$ ):

The method for preparing  $[\text{IrH}_2(\text{PPh}_3)_2(\text{C}_3\text{H}_6\text{O})_2]\text{SbF}_6$  reported by Zhao et al. was slightly modified (Scheme S1).<sup>[1]</sup>

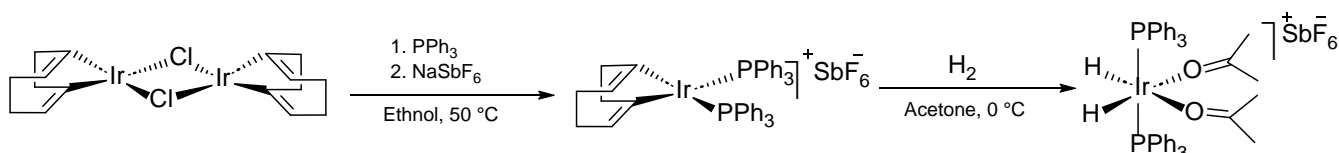

#### Scheme S1. Synthetic route of $[\text{IrH}_2(\text{PPh}_3)_2(\text{C}_3\text{H}_6\text{O})_2]\text{SbF}_6$ .

Chloro(1,5-cyclooctadiene)iridium(I) dimer (671.7 mg, 1.0 mmol 1.0 equiv) and triphenylphosphine (786.9 mg, 3.0 mmol 3.0 equiv) were dissolved in anhydrous ethanol (100 mL) under nitrogen atmosphere in a glovebox. The resulting solution was heated to 50 °C, and sodium hexafluoroantimonate (776.2 mg, 3.0 mmol 3.0 equiv) was added when all solids were dissolved. A bright red precipitate was formed in a few minutes. The suspension was stirred for another 2h, then the solid was collected by filtration, dissolved in acetone (20 ml). The resulting white solid sodium chloride was removed by filtration. The supernatant was removed by filtration, and the resulting dark red crystals were washed with hexane (3 x 10 mL) and dried under vacuum. Dark red crystal  $[\text{Ir}(\text{COD})(\text{PPh}_3)_2]\text{SbF}_6$  (1.86g, 88%) was obtained.  $[\text{Ir}(\text{COD})(\text{PPh}_3)_2]\text{SbF}_6$  (976.9 mg, 1 mmol) was dissolved in acetone (5 mL) at 0 °C and allowed to cool for 15 min. Hydrogen was then blowed into the solution until it turns pale yellow. Diethyl ether (20 mL) was added to afford  $[\text{IrH}_2(\text{PPh}_3)_2(\text{C}_3\text{H}_6\text{O})_2]\text{SbF}_6$  (white powder, 696 mg, 66%). All data are consistent with the reference.

#### $[\text{Ir}(\text{COD})(\text{PPh}_3)_2]\text{SbF}_6$ :

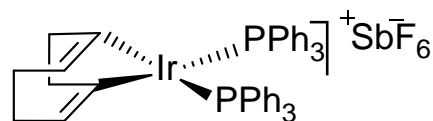

$^1\text{H}$  NMR (400 MHz, Chloroform-d)  $\delta$  7.45 – 7.27 (m, 30H), 4.20 (s, 3H), 2.40 – 2.33 (m, 3H), 1.95 (q,  $J = 7.6$  Hz, 4H).

$^{13}\text{C}$  NMR (101 MHz, Chloroform-d)  $\delta$  134.5, 134.4, 134.3, 134.3, 131.3, 130.0, 130.0, 129.7, 129.5, 129.4, 128.9, 128.7, 128.7, 128.6, 87.2, 87.1, 87.1, 77.4, 77.0, 76.7, 31.0.

$^{31}\text{P}$  NMR (162 MHz, Chloroform-d)  $\delta$  17.2.

HRMS (ESI, CH<sub>3</sub>CN,  $m/z$ , relative intensity): 825.2364 (calcd for  $[\text{C}_{44}\text{H}_{42}\text{IrP}_2]^+$ : 825.2391), 604.1720 (calcd for  $[\text{C}_{28}\text{H}_{30}\text{IrNP}]^+$ : 825.2391).

$[\text{IrH}_2(\text{PPh}_3)_2(\text{C}_3\text{H}_6\text{O})_2]\text{SbF}_6^-$  :

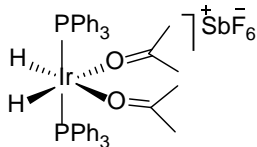

<sup>1</sup>H NMR (400 MHz, Acetone-d<sub>6</sub>) δ 7.53 (tdd, J = 7.6, 5.2, 3.0 Hz, 30H), -27.68 (t, J = 15.9 Hz, 2H).

<sup>13</sup>C NMR (101 MHz, Acetone-d<sub>6</sub>) δ 205.3, 133.8, 133.8, 133.7, 130.9, 128.8, 128.8, 128.7, 29.7, 29.6, 29.4, 29.2, 29.0, 28.8, 28.6, 28.4, 26.6.

<sup>31</sup>P NMR (162 MHz, Acetone-d<sub>6</sub>) δ 27.4, 27.3, 27.2, 27.2, 27.1.

HRMS (ESI, CH<sub>3</sub>CN, m/z, relative intensity): 717.1513 (calcd for [C<sub>36</sub>H<sub>30</sub>IrP<sub>2</sub>]<sup>3+</sup>: 717.1452), 760.1833 (calcd for [C<sub>38</sub>H<sub>35</sub>IrNP<sub>2</sub>]<sup>+</sup>: 760.1874), 801.2110 (calcd for [C<sub>40</sub>H<sub>38</sub>IrN<sub>2</sub>P<sub>2</sub>]<sup>+</sup>: 801.2139).

#### Synthesis of **L1** and **L2**:

The synthesis of ligands is based on the method reported by Stockwell et al. with a slight modification (Scheme S2).<sup>[2]</sup>

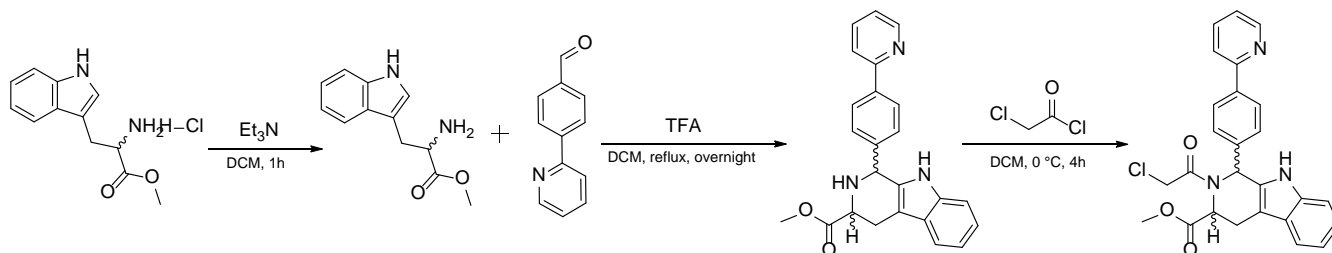

#### Scheme S2. General synthetic route of the ligands.

D-Tryptophan methyl ester hydrochloride (2.5 g, 10.0 mmol 1.0 equiv) in dichloromethane (50 mL) was added triethylamine (1.6 mL, 11.0 mmol 1.1 equiv) at room temperature for 1 h. The mixture was then filtered and the filtrate was concentrated under reduced pressure to afford a colorless oil. After drying under vacuum for 30 min, the oil was dissolved in anhydrous dichloromethane (50 mL), 4-(2-pyridinyl)benzaldehyde (1.8 g, 10.0 mmol 1.0 equiv) and trifluoroacetic acid (2.2 mL, 30.0 mmol 3.0 equiv) were added and the reaction was refluxed overnight. The mixture was cooled to room temperature and quenched with saturated aqueous sodium bicarbonate. The organic phase was separated, washed with brine, dried over sodium sulfate and then concentrated under reduced pressure to give the crude product. The crude product and triethylamine (2.1 mL, 15.0 mmol 1.5 equiv) were dissolved in anhydrous dichloromethane (50 mL) at 0 °C and allowed to cool for 15 min. Chloroacetyl chloride (955.0 μL, 12.0 mmol 1.2 equiv) was then added dropwise and the reaction mixture was allowed to stir at room temperature for 4 h. The mixture was filtered and the filter residue was dried over vacuum to afford **L2** (light yellow powder, 2.66 g, 58%). The filtrate was washed with water and brine, dried with sodium sulfate and concentrated. **L1** (yellow powder, 1.42 g, 31%) was afforded by silica gel chromatography (dichloromethane: ethyl acetate = 5: 1).

#### Synthesis of **L3** and **L4**:

**L4** (pale yellow powder, 2.80 g, 61%) and **L3** (yellow powder, 1.33 g, 29%) were afforded by the same method described above with L-tryptophan methyl ester hydrochloride as the starting reagent.

## SUPPORTING INFORMATION

### Ligand (1R,3R) (L2):

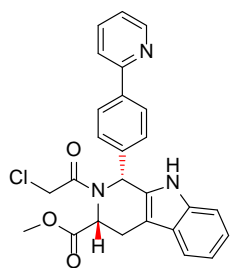

**<sup>1</sup>H NMR** (400 MHz, DMSO-*d*<sub>6</sub>) δ 10.96 (s, 1H), 8.65 (dd, *J* = 4.8, 1.8 Hz, 1H), 8.01 (d, *J* = 8.1 Hz, 2H), 7.92 (d, *J* = 8.0 Hz, 1H), 7.86 (td, *J* = 7.7, 1.9 Hz, 1H), 7.58 (d, *J* = 7.8 Hz, 1H), 7.37 – 7.28 (m, 2H), 7.20 (d, *J* = 8.0 Hz, 1H), 7.16 – 7.08 (m, 1H), 7.05 (t, *J* = 7.4 Hz, 1H), 6.94 (s, 1H), 5.25 (d, *J* = 6.7 Hz, 1H), 4.88 (d, *J* = 13.9 Hz, 1H), 4.49 (d, *J* = 13.9 Hz, 1H), 3.51 (d, *J* = 15.9 Hz, 1H), 3.14 (dd, *J* = 16.0, 7.2 Hz, 1H), 3.06 (td, *J* = 7.3, 4.4 Hz, 1H), 2.89 (s, 3H).

**<sup>13</sup>C NMR** (101 MHz, DMSO-*d*<sub>6</sub>) δ 170.7, 167.3, 156.1, 150.0, 140.8, 138.7, 137.7, 136.9, 130.2, 129.7, 126.5, 126.4, 123.1, 122.1, 120.7, 119.2, 118.6, 111.8, 106.8, 55.4, 52.9, 52.0, 51.7, 46.0, 43.7, 40.6, 40.4, 40.2, 40.0, 39.8, 39.6, 39.4, 21.6, 9.0.

**HRMS** (ESI, CH<sub>3</sub>CN, *m/z*, relative intensity): 460.1388 (calcd for [C<sub>26</sub>H<sub>22</sub>ClN<sub>3</sub>O<sub>3</sub> + H]<sup>+</sup>: 460.1428), 482.1220 (calcd for [C<sub>26</sub>H<sub>22</sub>ClN<sub>3</sub>O<sub>3</sub> + Na]<sup>+</sup>: 482.1247).

### Ligand (1S,3R) (L1):

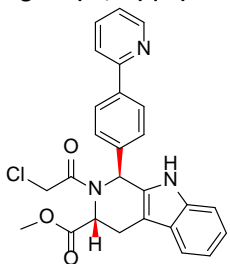

**<sup>1</sup>H NMR** (400 MHz, DMSO-*d*<sub>6</sub>) δ 10.96 (s, 1H), 8.63 (s, 1H), 8.09 (s, 1H), 7.95 (d, *J* = 8.0 Hz, 1H), 7.85 (dt, *J* = 15.4, 8.2 Hz, 2H), 7.67 – 7.59 (m, 1H), 7.51 (dd, *J* = 15.7, 7.8 Hz, 2H), 7.27 (d, *J* = 30.5 Hz, 2H), 6.99 (q, *J* = 11.2 Hz, 2H), 6.06 (s, 1H), 5.42 (s, 1H), 4.75 (d, *J* = 14.0 Hz, 1H), 4.43 (d, *J* = 14.0 Hz, 1H), 3.54 (d, *J* = 9.4 Hz, 4H), 3.40 (d, *J* = 18.7 Hz, 1H).

**<sup>13</sup>C NMR** (101 MHz, DMSO-*d*<sub>6</sub>) δ 168.2, 150.0, 145.1, 137.6, 136.9, 127.6, 127.0, 126.8, 126.3, 122.9, 121.8, 120.6, 119.3, 118.5, 111.8, 104.0, 60.2, 57.1, 56.5, 53.2, 43.8, 40.6, 40.4, 40.2, 40.0, 39.8, 39.6, 39.4, 24.0, 21.2, 14.6.

**HRMS** (ESI, CH<sub>3</sub>CN, *m/z*, relative intensity): 460.1399 (calcd for [C<sub>26</sub>H<sub>22</sub>ClN<sub>3</sub>O<sub>3</sub> + H]<sup>+</sup>: 460.1428), 482.1221 (calcd for [C<sub>26</sub>H<sub>22</sub>ClN<sub>3</sub>O<sub>3</sub> + Na]<sup>+</sup>: 482.1247).

### Ligand (1S,3S) (L4):

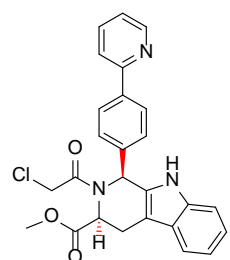

**<sup>1</sup>H NMR** (400 MHz, DMSO-*d*<sub>6</sub>) δ 10.96 (s, 1H), 8.63 (s, 1H), 8.10 (d, *J* = 8.3 Hz, 1H), 7.95 (d, *J* = 7.9 Hz, 1H), 7.85 (dt, *J* = 15.5, 8.1 Hz, 2H), 7.63 (s, 1H), 7.51 (dd, *J* = 15.6, 7.8 Hz, 2H), 7.31 (s, 1H), 7.24 (d, *J* = 7.8 Hz, 1H), 7.00 (dt, *J* = 21.9, 7.6 Hz, 2H), 6.06 (s, 1H), 5.42 (s, 1H), 4.75 (d, *J* = 14.0 Hz, 1H), 4.43 (d, *J* = 14.0 Hz, 1H), 3.54 (d, *J* = 9.4 Hz, 4H), 3.44 – 3.35 (m, 1H).

**<sup>13</sup>C NMR** (101 MHz, DMSO-*d*<sub>6</sub>) δ 168.2, 150.0, 145.1, 137.6, 136.9, 134.7, 127.6, 127.0, 126.3, 122.9, 121.8, 120.6, 119.3, 118.5, 111.8, 60.2, 57.1, 56.5, 53.2, 43.8, 40.6, 40.4, 40.2, 40.0, 39.8, 39.6, 39.4, 24.0, 21.2, 14.6.

**HRMS** (ESI, CH<sub>3</sub>CN, *m/z*, relative intensity): 460.1397 (calcd for [C<sub>26</sub>H<sub>22</sub>ClN<sub>3</sub>O<sub>3</sub> + H]<sup>+</sup>: 460.1428), 482.1221 (calcd for [C<sub>26</sub>H<sub>22</sub>ClN<sub>3</sub>O<sub>3</sub> + Na]<sup>+</sup>: 482.1247).

### Ligand (1R,3S) (L3):

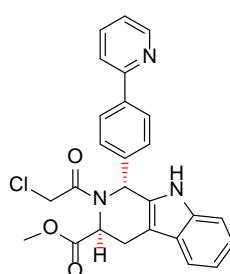

**<sup>1</sup>H NMR** (400 MHz, DMSO-*d*<sub>6</sub>) δ 10.96 (s, 1H), 8.65 (dd, *J* = 4.8, 1.8 Hz, 1H), 8.01 (d, *J* = 8.0 Hz, 2H), 7.92 (d, *J* = 8.0 Hz, 1H), 7.86 (td, *J* = 7.7, 1.8 Hz, 1H), 7.58 (d, *J* = 7.8 Hz, 1H), 7.37 – 7.28 (m, 2H), 7.20 (d, *J* = 8.0 Hz, 1H), 7.16 – 7.08 (m, 1H), 7.05 (t, *J* = 7.4 Hz, 1H), 6.94 (s, 1H), 5.25 (d, *J* = 6.8 Hz, 1H), 4.87 (d, *J* = 13.8 Hz, 1H), 4.49 (d, *J* = 13.9 Hz, 1H), 3.51 (d, *J* = 15.9 Hz, 1H), 3.14 (dd, *J* = 16.1, 7.1 Hz, 2H), 2.89 (s, 3H).

**<sup>13</sup>C NMR** (101 MHz, DMSO-*d*<sub>6</sub>) δ 170.7, 167.3, 156.1, 150.0, 140.8, 138.7, 137.7, 136.9, 130.2, 129.7, 126.5, 126.4, 123.1, 122.1, 120.7, 119.2, 118.6, 111.8, 106.8, 52.9, 52.0, 51.7, 43.7, 40.6, 40.4, 40.2, 40.0, 39.8, 39.6, 39.4, 21.6.

**HRMS** (ESI, CH<sub>3</sub>CN, *m/z*, relative intensity): 460.1397 (calcd for [C<sub>26</sub>H<sub>22</sub>ClN<sub>3</sub>O<sub>3</sub> + H]<sup>+</sup>: 460.1428), 482.1221 (calcd for [C<sub>26</sub>H<sub>22</sub>ClN<sub>3</sub>O<sub>3</sub> + Na]<sup>+</sup>: 482.1247).

### General method for synthesizing Ir-Py-RSL:

[IrH<sub>2</sub>(PPh<sub>3</sub>)<sub>2</sub>(C<sub>3</sub>H<sub>6</sub>O)<sub>2</sub>]SbF<sub>6</sub> (100.0 mg, 0.9 mmol 1.0 equiv), ligand (47.3 mg, 1.0 mmol 1.1 equiv), and 3,3-dimethyl-1-butene (50.0 μL, 3.7 mmol 4.0 equiv) were dissolved in acetone (3 mL) in a 15 mL pressure tube under nitrogen atmosphere. The mixture was stirred under reflux overnight. After cooling to room temperature, diethyl ether (10 mL) was added to the mixture and the tube was placed in the refrigerator at -4 °C for 10 h. The reaction mixture was filtered and dried under vacuum for 2 h to afford Ir-Py-RSL (Scheme S3).

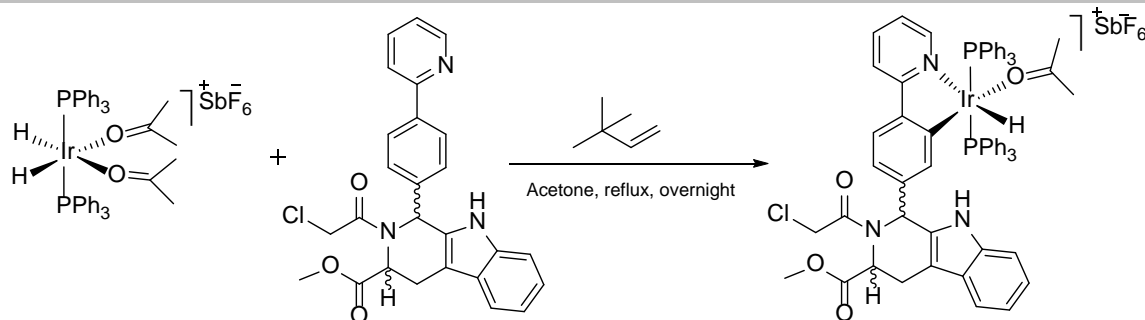

Scheme S3. General synthetic route of Ir-RSL complexes.

**Ir-Py-RSL (1R,3R) (Ir2)** (yellow powder, 91 mg, 66%):

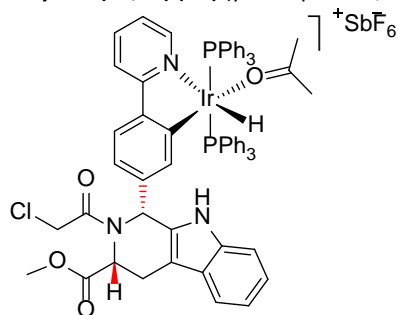

$^1\text{H NMR}$  (400 MHz, Acetone- $d_6$ )  $\delta$  9.44 (d,  $J = 5.4$  Hz, 1H), 8.16 (s, 1H), 7.64 – 7.57 (m, 1H), 7.46 – 7.38 (m, 6H), 7.27 (dt,  $J = 19.6, 8.8$  Hz, 20H), 7.12 – 7.03 (m, 12H), 6.20 (s, 1H), 4.35 (s, 1H), 4.09 (d,  $J = 31.2$  Hz, 4H), 3.00 (d,  $J = 64.8$  Hz, 3H), 2.09 (s, 6H), -15.72 (s, 1H).

$^{13}\text{C NMR}$  (101 MHz, Acetone- $d_6$ )  $\delta$  205.2, 163.6, 147.8, 137.3, 136.6, 136.4, 133.8, 133.7, 133.7, 133.7, 130.5, 130.3, 128.4, 128.4, 128.4, 128.3, 128.3, 128.3, 128.2, 128.2, 127.9, 122.3, 121.7, 120.1, 119.3, 118.0, 65.2, 51.9, 31.4, 29.7, 29.5, 29.3, 29.1, 28.9, 28.8, 28.6, 28.4, 22.2, 14.7.

$^{31}\text{P NMR}$  (162 MHz, Acetone- $d_6$ )  $\delta$  15.4.

**HRMS** (ESI,  $\text{CH}_3\text{CN}$ ,  $m/z$ , relative intensity): 1176.2798 (calcd for  $[\text{C}_{62}\text{H}_{52}\text{ClIrN}_3\text{O}_3\text{P}_2]^+$ ): 1176.2802, 1217.3004 (calcd for  $[\text{C}_{64}\text{H}_{55}\text{ClIrN}_4\text{O}_3\text{P}_2]^+$ ): 1217.3067).

**Ir-Py-RSL (1S,3R) (Ir1)** (yellow powder, 95 mg, 69%):

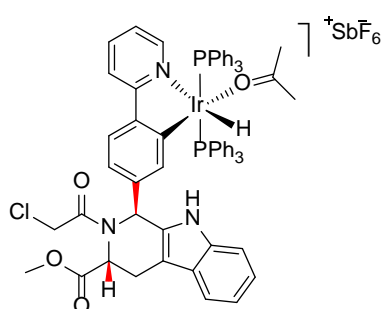

$^1\text{H NMR}$  (400 MHz, Acetone- $d_6$ )  $\delta$  9.50 (s, 1H), 7.66 – 7.60 (m, 1H), 7.55 (dd,  $J = 7.8, 4.8$  Hz, 1H), 7.49 (td,  $J = 5.7, 2.8$  Hz, 2H), 7.42 (t,  $J = 7.3$  Hz, 4H), 7.37 (d,  $J = 7.2$  Hz, 2H), 7.34 (s, 2H), 7.30 (s, 2H), 7.24 – 7.13 (m, 19H), 7.11 – 7.08 (m, 3H), 7.02 (d,  $J = 8.5$  Hz, 4H), 6.08 (s, 1H), 4.36 (s, 1H), 4.19 (d,  $J = 13.6$  Hz, 1H), 3.56 (s, 4H), 3.20 (dd,  $J = 16.0, 6.1$  Hz, 1H), 2.83 (s, 1H), 2.09 (s, 6H), -15.81 (t,  $J = 15.1$  Hz, 1H).

$^{13}\text{C NMR}$  (101 MHz, Acetone- $d_6$ )  $\delta$  205.2, 167.1, 147.7, 137.4, 136.8, 133.6, 133.4, 130.7, 130.5, 128.4, 128.4, 128.3, 128.3, 128.2, 127.8, 127.7, 125.6, 122.6, 121.6, 120.9, 120.2, 119.0, 118.5, 111.3, 65.2, 57.4, 54.5, 42.0, 29.7, 29.5, 29.3, 29.1, 28.9, 28.8, 28.6, 28.4, 22.4, 14.7.

$^{31}\text{P NMR}$  (162 MHz, Acetone- $d_6$ )  $\delta$  16.4, 15.9.

**HRMS** (ESI,  $\text{CH}_3\text{CN}$ ,  $m/z$ , relative intensity): 1176.2774 (calcd for  $[\text{C}_{62}\text{H}_{52}\text{ClIrN}_3\text{O}_3\text{P}_2]^+$ ): 1176.2802, 1217.3001 (calcd for  $[\text{C}_{64}\text{H}_{55}\text{ClIrN}_4\text{O}_3\text{P}_2]^+$ ): 1217.3067).

**Ir-Py-RSL (1S,3S) (Ir4)** (yellow powder, 102 mg, 73%):

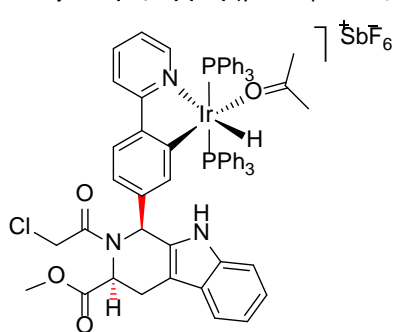

$^1\text{H NMR}$  (400 MHz, Acetone- $d_6$ )  $\delta$  9.51 (d,  $J = 5.3$  Hz, 1H), 7.62 (d,  $J = 7.1$  Hz, 1H), 7.57 – 7.53 (m, 2H), 7.49 (ddd,  $J = 7.2, 5.6, 1.4$  Hz, 2H), 7.42 (t,  $J = 7.4$  Hz, 4H), 7.37 (d,  $J = 7.6$  Hz, 2H), 7.33 (s, 2H), 7.30 (d,  $J = 5.5$  Hz, 3H), 7.24 – 7.14 (m, 19H), 7.10 – 7.08 (m, 3H), 7.03 (s, 4H), 6.08 (s, 1H), 4.36 (s, 1H), 4.19 (d,  $J = 13.6$  Hz, 1H), 3.55 (d,  $J = 6.4$  Hz, 3H), 3.20 (dd,  $J = 15.9, 6.4$  Hz, 1H), 2.83 (s, 1H), 2.09 (s, 6H), -15.81 (t,  $J = 15.1$  Hz, 1H).

$^{13}\text{C NMR}$  (101 MHz, Acetone- $d_6$ )  $\delta$  205.3, 167.1, 147.7, 137.4, 136.8, 136.7, 133.5, 133.3, 131.8, 130.7, 130.5, 128.4, 128.4, 128.3, 128.3, 128.2, 128.1, 127.8, 127.7, 127.1, 125.6, 122.6, 121.6, 120.2, 119.1, 118.5, 111.3, 65.2, 57.4, 54.5, 42.0, 31.4, 29.7, 29.5, 29.3, 29.1, 29.0, 28.8, 28.6, 28.4, 22.4, 14.7.

$^{31}\text{P NMR}$  (162 MHz, Acetone- $d_6$ )  $\delta$  16.4, 15.9.

**HRMS** (ESI,  $\text{CH}_3\text{CN}$ ,  $m/z$ , relative intensity): 1176.2790 (calcd for  $[\text{C}_{62}\text{H}_{52}\text{ClIrN}_3\text{O}_3\text{P}_2]^+$ ): 1176.2802, 1217.3006 (calcd for  $[\text{C}_{64}\text{H}_{55}\text{ClIrN}_4\text{O}_3\text{P}_2]^+$ ): 1217.3067).

## SUPPORTING INFORMATION

**Ir-Py-RSL (1R,3S) (Ir3)** (yellow powder, 88 mg, 64%):

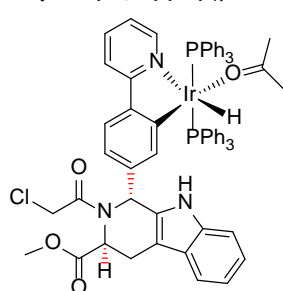

<sup>1</sup>H NMR (400 MHz, Acetone-d<sub>6</sub>) δ 9.44 (d, J = 5.1 Hz, 1H), 8.16 (s, 1H), 7.63 – 7.58 (m, 1H), 7.39 (dd, J = 8.0, 3.0 Hz, 7H), 7.27 (dt, J = 20.6, 10.5 Hz, 20H), 7.10 – 7.03 (m, 11H), 6.20 (s, 1H), 4.35 (s, 1H), 4.09 (d, J = 31.0 Hz, 4H), 3.08 (s, 3H), 2.09 (s, 6H), -15.72 (s, 1H).

<sup>13</sup>C NMR (101 MHz, Acetone-d<sub>6</sub>) δ 205.2, 163.6, 147.8, 137.3, 136.6, 136.4, 133.8, 133.7, 133.7, 133.7, 133.6, 133.5, 130.5, 130.3, 128.4, 128.4, 128.4, 128.3, 128.3, 128.3, 128.2, 128.2, 122.3, 121.7, 120.1, 119.3, 118.0, 111.3, 65.2, 51.9, 29.7, 29.5, 29.3, 29.1, 28.9, 28.8, 28.6, 28.4, 22.2, 14.7, 13.4.

<sup>31</sup>P NMR (162 MHz, Acetone-d<sub>6</sub>) δ 15.4.

HRMS (ESI, CH<sub>3</sub>CN, m/z, relative intensity): 1176.2759 (calcd for [C<sub>62</sub>H<sub>52</sub>ClIrN<sub>3</sub>O<sub>3</sub>P<sub>2</sub>]<sup>+</sup>: 1176.2802), 1217.2985 (calcd for [C<sub>64</sub>H<sub>55</sub>ClIrN<sub>4</sub>O<sub>3</sub>P<sub>2</sub>]<sup>+</sup>: 1217.3067).

### High performance liquid chromatography (HPLC)

HPLC analysis was performed on Shimadzu SPD-20A using Daicel Chiralpak IG-3 Column (particle size: 3 μm; dimensions: 4.6 mm l. D. x 250 mm l). Mobile phase is 95% isopropanol: 5% n-hexane, flow rate is 0.5 mL/min.

### Circular dichroism (CD) spectra detection

All complexes were dissolved in tetrahydrofuran and the concentration was 10 μM. CD spectra were conducted on a Jasco J-810 spectropolarimeter. The spectra were made by Origin 2018.

### Partition Coefficient, log P<sub>o/w</sub>

Octanol-saturated water (OSW) and water-saturated octanol (WSO) were prepared by mixing analytical grade octanol and 1x PBS solution. Aliquots of stock solutions of the Ir complexes in OSW were added to equal volumes of WSO and shaken overnight. The aqueous and octanol layers were carefully separated into test tubes and analysed by UV-Vis spectroscopy. Partition coefficients were calculated using the equation:

$$\log P_{o/w} = \log ([Ir]_{wso} / [Ir]_{osw})$$

### Cellular uptake measurement

HT1080 cells were seeded onto 6-well plates (10<sup>6</sup> cells/well) for 24 h. 10 μM Ir1 was added followed by incubation for 10 min, 20 min, 30 min, 60 min, and 120 min. Three repetitions were performed for each concentration. Then the medium was removed and washed 3 times with PBS. Cells were then collected for the detection of Ir content by ICP-MS.

### Cytotoxicity and cell viability

The cytotoxicity of ligands, corresponding Ir(III) complexes, and cisplatin towards HT1080, PANC-1, HEK-293T, and HLF were determined using cell counting kit-8 (CCK-8) assay.

Cells were seeded in 96-well tissue culture plates (5000 cells per well) for 24 h and then incubated with different concentrations of complexes for 48 h. Subsequently, 10 μL of CCK8 was added per well and incubated for 4 h. Afterwards, the optical density (OD) was measured under 450 nm using a microplate reader (Tecan Infinite M1000 PRO). Half maximal inhibitory concentration (IC<sub>50</sub>) value was calculated using Graphpad prism analysis. All experiments were conducted three times to ensure the reproducibility of the results.

### Cell death pattern

HT1080 cells were seeded in 96-well tissue culture plates (5000 cells per well) for 24 h and then 1 μM ligands and 10 μM Ir(III) complexes were added, respectively. Subsequently, 20 μM Z-VAD, 2 μM Fer-1, 40 μM DFO, and 25 μM Nec-1 were added separately and incubated for 48 h. Each group was repeated three times to ensure the reproducibility of the results. Cell viability was tested by the same procedure described above and calculated using the following formula:

## SUPPORTING INFORMATION

---

$$\text{Cell viability (\%)} = \frac{\text{OD Sample} - \text{OD Blank}}{\text{OD Control} - \text{OD Blank}} * 100$$

### Cellular ROS and lipid peroxidation

Cellular ROS were detected using a Reactive Oxygen Species Assay Kit (KeyGEN BioTECH Co., Ltd., China) by the manufacturer's protocol. Briefly, HT1080 cells were seeded onto 6-well plates for 24 h and then treated with 10 and 20  $\mu\text{M}$  solutions of **L1** and **Ir1** for 3 h, respectively. PBS was used as the control group. Three repetitions were performed for each group. Cells were then washed three times with serum-free Dulbecco's modified eagle medium (DMEM), probed with 10  $\mu\text{M}$  DCFH-DA, and incubated in 5%  $\text{CO}_2$  at 37  $^\circ\text{C}$  for 30 min. Cells were washed with PBS three times before being collected, and fluorescence detection was performed by the FL-1H channel on a flow cytometer (BD FACSCalibur). The lipid peroxidation level was determined using 5  $\mu\text{M}$  BODIPY-C11 dye (Invitrogen, USA) by the same procedure as described above with 10  $\mu\text{M}$  **L1** and **Ir1**, compared with 10  $\mu\text{M}$  **L3**, **Ir3**, and PBS as the control.

### Quantitative RT-PCR

HT1080 cells were seeded in 6-well tissue culture plates for 24 h. Then, 10  $\mu\text{M}$  **Ir1** and PBS (control) were incubated with the cells for another 24 h. Cells were then washed once with PBS and collected by centrifugation. The total RNA was purified using RNA Extraction Kits (OMEGA, USA) according to the manufacturer's instructions, which was then used in a reverse transcription reaction using the Fastking RT Kit with gDNA (TIANGEN, China). Primers for qPCR were designed with Primer Express. Quantitative PCR was performed on triplicate samples in 96-well format using Power SYBR Green Master Mix (Takara, China) on an Applied Biosystems Cyclor set to absolute quantification. The change in expression of a gene between the experimental and control conditions was computed using the  $\Delta\Delta t$  method with actin as an internal reference gene.

### Western Blot experiments

HT1080 cells were seeded in a 25  $\text{cm}^2$  cell culture flask for 24 h. 10  $\mu\text{M}$  **Ir1** and 1  $\mu\text{M}$  **L1** were added and incubated for 12 h, respectively. PBS-treated HT1080 cells were used as the control. The cells were washed three times with PBS before collecting. Whole-cell proteins were prepared by the Whole Cell Lysis assay kit (KeyGEN Biotech Co., Ltd, Nanjing, China), and the protein concentration was determined by the Super-Bradford Protein assay kit (CW Biotech, Inc., Beijing, China). The expression levels of GPX4 and FSP1 were then determined. Briefly, the extracts were first separated by 10% SDS-PAGE and transferred to a polyvinylidene difluoride membrane (BioRad, CA, USA). The membrane was blocked with 5% BSA in PBS at 25  $^\circ\text{C}$  for 2 h and then incubated with antibodies at 4  $^\circ\text{C}$  overnight. The expression of  $\beta$ actin was used as the internal standard. The primary antibodies against the following proteins were used:  $\beta$ -actin (A1978, 1:10,000 for WB) from Sigma; GPX4 (ab125066, 1:1000 for WB) from Abcam; FSP1 (aa114-163, 1:1000 for WB) from Gonnspan.

### Mitochondrial Morphology Analysis

HT1080 cells were seeded in a 25  $\text{cm}^2$  cell culture flask for 24 h. 10  $\mu\text{M}$  **Ir1** was added and incubated for 12 h. After washing with PBS three times, cells were collected and transferred to fixative, sliced, and imaged by TEM (Hitachi HT7700).

### Fluorescence detection

All complexes were dissolved in DMSO and the concentration was 10  $\mu\text{M}$ . The detection was performed by Shimadzu RF-6000 spectrofluorophotometer under 488 nm excitation. The spectra were made by Origin 2018.

### UV-Vis spectra detection

All complexes were dissolved in acetonitrile and the concentration was 10  $\mu\text{M}$ . The spectra were conducted on a Shimadzu UV-1800 spectrophotometer. The spectra were made by Origin 2018.



## SUPPORTING INFORMATION

### Intracellular localization monitoring and organelle colocalization imaging

HT1080 cells were seeded in confocal microscopy dishes for 24 h before adding 10  $\mu\text{M}$  **Ir1**. After incubating for different times, the cells were washed with PBS three times and imaged in an Axio Observer Z1 ZEISS fluorescence microscope with Apotome2 software ( $\lambda_{\text{ex}} = 488$  nm).

We chose the 90 min and 150 min time points group for further organelle colocalization imaging. Briefly, the cells were incubated with 2  $\mu\text{M}$  MTR ( $\lambda_{\text{ex}} = 572$  nm) for 15 min and then washed with PBS three times. Subsequently, 5  $\mu\text{M}$  DAPI ( $\lambda_{\text{ex}} = 375$  nm) was added for another 15 min incubation before washing three times by PBS. The cells were imaged by the same microscope above.

### Quantification of iridium content in organelles

HT1080 cells were seeded in a 25 cm<sup>2</sup> cell culture flask for 24 h. Then incubated with 10  $\mu\text{M}$  **Ir1** for 12 h and washed three times with PBS. Cells were collected by centrifugation and tested by inductively coupled plasma mass spectrometry (ICP-MS) to quantify the iridium content.

### Label-free quantitative proteomics profiling

HT1080 cells were seeded in a 25 cm<sup>2</sup> cell culture flask for 24 h and then incubated with 10  $\mu\text{M}$  **Ir1** and PBS (control) for 3 h, respectively. The medium was discarded and washed with PBS three times. Subsequently, cells were collected and one volume of SDT buffer (4% SDS, 100 mM Tris-HCl, 1 mM DT, pH 7.6) was used for sample lysis and protein extraction. The solution was boiled for 15 min and centrifuged at 14,000 g for 20 min. Protein digestion (200  $\mu\text{g}$  for each sample) was performed according to the FASP procedure described by Mann et al. Briefly, the detergent, DTT, and other low-molecular-weight components were removed by using 200  $\mu\text{L}$  of UA buffer (8 M urea, 150 mM Tris-HCl, pH 8.0) for repeated ultrafiltration (Microcon units, 10 kD). 100  $\mu\text{L}$  of iodoacetamide (100 mM in UA buffer) was added to block reduced cysteine residues, and the samples were incubated for 30 min in the dark. The filter was washed with 100  $\mu\text{L}$  UA buffer three times, and with 100  $\mu\text{L}$  of  $\text{NH}_4\text{HCO}_3$  (25 mM) twice. Finally, the protein suspension was digested with 4  $\mu\text{g}$  of trypsin (Promega, USA) in 40  $\mu\text{L}$  of 25 mM  $\text{NH}_4\text{HCO}_3$  overnight at 37 °C, and the resulting peptides were collected as a filtrate. The peptides of each sample were desalted on C18 Cartridges (Empore™ SPE Cartridges C18 (standard density), bed I.D. 7 mm, volume 3 ml, Sigma), concentrated by vacuum centrifugation and reconstituted in 40  $\mu\text{L}$  of 0.1% (v/v) formic acid. The peptide content was estimated by the UV light spectral density at 280 nm by using an extinction coefficient of 1.1 for 0.1% (g/L) solution and calculated based on the frequency of tryptophan and tyrosine in vertebrate proteins.

LC-MS/MS analysis was tested on a Q Exactive mass spectrometer (Thermo Scientific, USA) coupled to Easy nLC (Proxeon Biosystems, now Thermo Fisher Scientific). The peptides were loaded onto a reverse phase trap column (Thermo Scientific Acclaim PepMap100, 100  $\mu\text{m} \times 2$  cm, nanoViper C18) connected to the C18-reversed-phase analytical column (Thermo Scientific Easy Column, 10 cm long, 75  $\mu\text{m}$  inner diameter, 3  $\mu\text{m}$  resin) in buffer A (0.1% Formic acid) and separated with a linear gradient of buffer B (84% acetonitrile and 0.1% Formic acid) at a flow rate of 300 nL/min controlled by IntelliFlow technology. The mass spectrometer was operated in positive ion mode, and the ion scanning range was 300–1,800 m/z. The primary mass spectrometer resolution was 70,000 at 200 m/z and the AGC (automatic gain control) target was  $3 \times 10^6$ , the maximum inject time was 10 ms, and the dynamic exclusion time was 40 s. The mass/charge ratio of the polypeptide and polypeptide fragments was collected as follows: 20 fragments were acquired after each full scan, the MS2 Activation Type was HCD, and the Isolation window was 2 m/z. The rate was 17,500 at 200 m/z, Normalized Collision Energy 30 eV, and Underfill was 0.1%. In this study, we used the label-free quantification algorithm for quantification. The raw MS data were identified and quantified by using MaxQuant 1.5.3.17 software. The GO analysis was carried out with Blast2GO. KEGG pathway annotation on the target protein set was performed with KAAS (KEGG automatic annotation server) software. Protein subcellular localization was realized by using CELLO (<http://cello.life.nctu.edu.tw/>). Protein clustering was performed as follows: the quantitative information of the target protein set was normalized to the interval of (-1, 1). Then Cluster 3.0 software and Java Treeview software were used to perform hierarchical clustering analysis. Enrichment analysis was applied based on the Fisher' exact test, considering the whole quantified proteins as the background dataset. And only functional categories and pathways with p-values under a threshold of 0.05 were considered as significant. Protein-protein interaction analysis was based on IntAct database (<http://www.ebi.ac.uk/intact/>) by their gene symbols or STRING software. The results were further analyzed by Cytoscape software 3.2.1. All experiments were repeated three times to ensure the reproducibility of the results.

### Toxicity tests *in vivo*

Balb/c mice (4-6 weeks old) were i.v. injected with **Ir1** (5 mg/kg) and ligand (1S, 3R) (5 mg/kg) separately via the tail vein. The mice were randomly divided into 3 groups and subjected to variable conditions. The blood of the mouse was collected at 7 d after injection for hematology analysis and serum biochemistry assay. Hematology analysis was measured on a Photoelectric MEK-822K automatic five-class blood cell analyzer instrument. Serum biochemistry assays were performed using Urea Assay Kit, Aspartate aminotransferase Assay Kit, Alanine aminotransferase Assay Kit, and Lactate dehydrogenase assay kit (Nanjing Jiancheng Bioengineering Institute, China). The

## SUPPORTING INFORMATION

---

major organs (liver, spleen, kidney, heart, and lung) were harvested, fixed in 10% neutral buffered formalin, processed routinely into paraffin, sectioned at 8  $\mu$ m, stained with hematoxylin and eosin, and examined by digital microscopy. The mice were weighed for 7 days.

### **Anti-tumor experiments *in vivo***

BALB/c female mice (6-8 weeks old) were injected HT1080 cells suspension in PBS ( $5 \times 10^6$  per mouse) subcutaneously into the armpit. After the HT1080 tumor model establishment, mice were divided into 3 groups. **Ir1** (5 mg/kg), **L1** (5 mg/kg), and PBS were respectively administered to the mice of each group intravenously via tail vein at 1 d, 4 d, and 7d. Tumor growth was monitored by measuring the perpendicular diameter of the tumor using a vernier caliper every three days and calculated according to the formula: Tumor volume ( $\text{mm}^3$ ) =  $0.5 \times \text{width}^2 \times \text{length}$ . The animals were sacrificed at 15 d after the first treatment then tumors were excised.

# SUPPORTING INFORMATION

## Supporting Figures and Tables

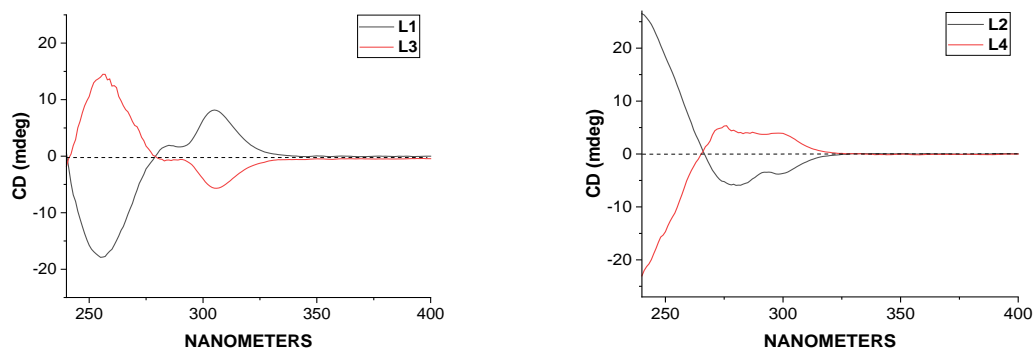

Figure S1. CD spectra of L1-4.

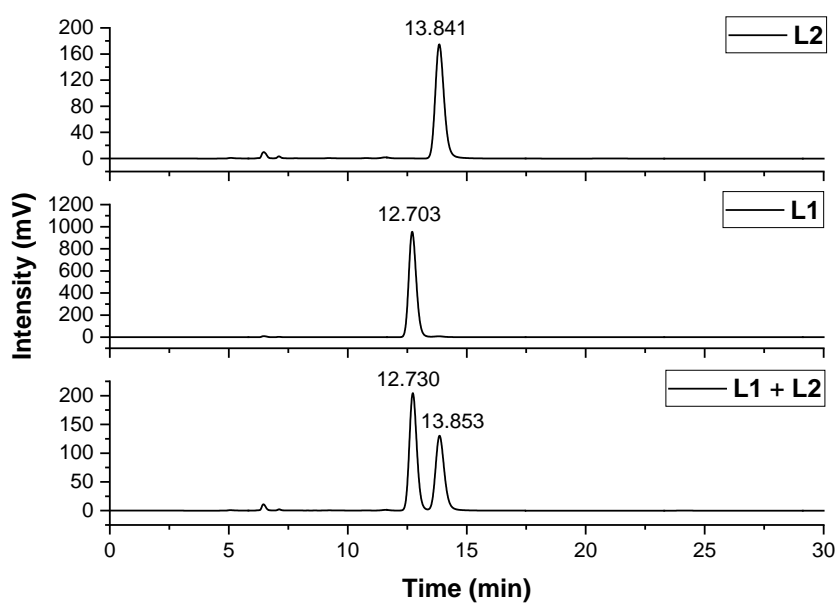

Figure S2. HPLC analysis of L1 and L2.

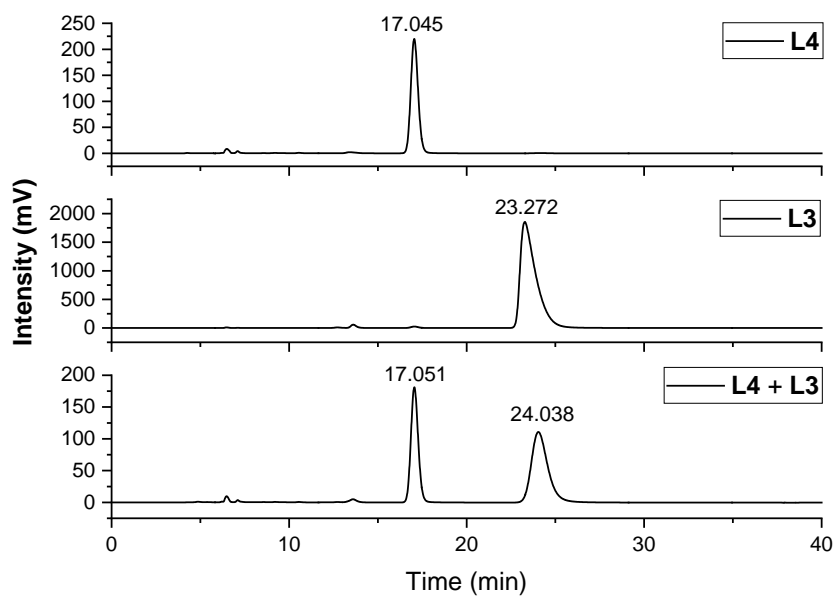

Figure S3. HPLC analysis of L3 and L4.

## SUPPORTING INFORMATION

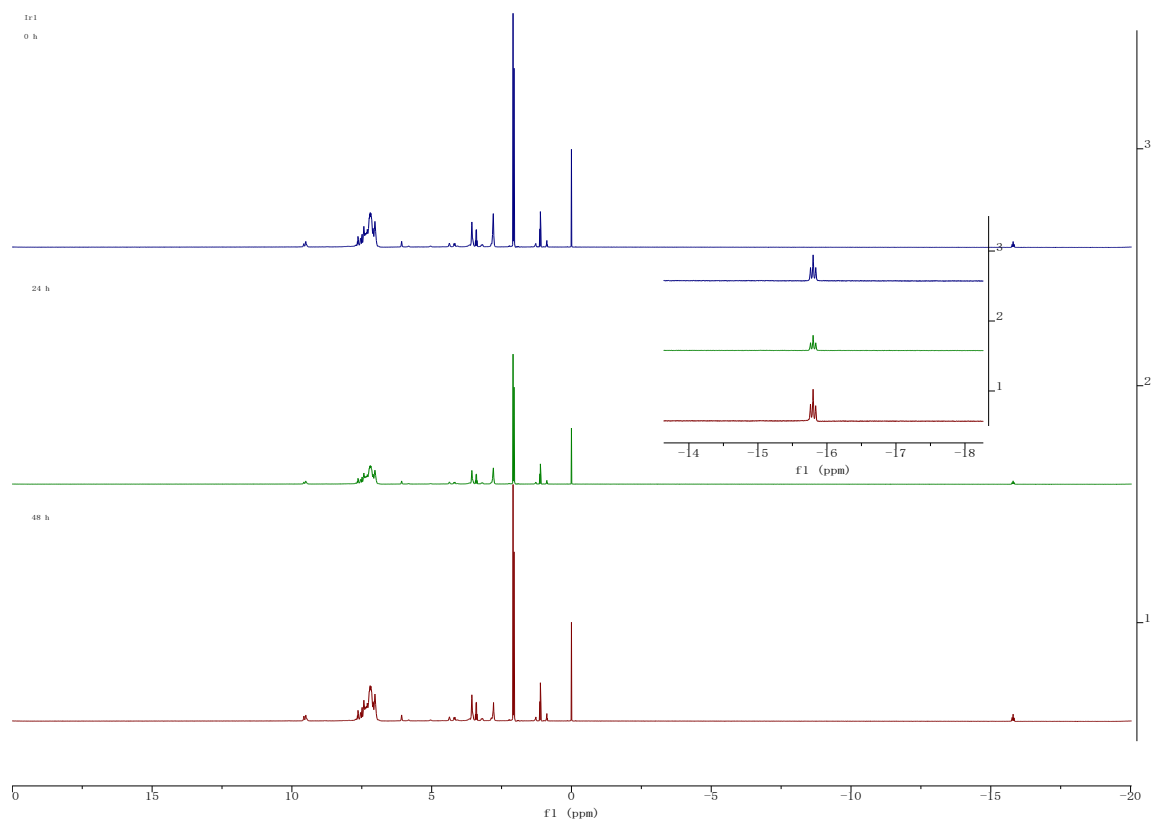

**Figure S4.** NMR spectra of Ir1 in 0 h, 24 h, and 48 h at 37°C.

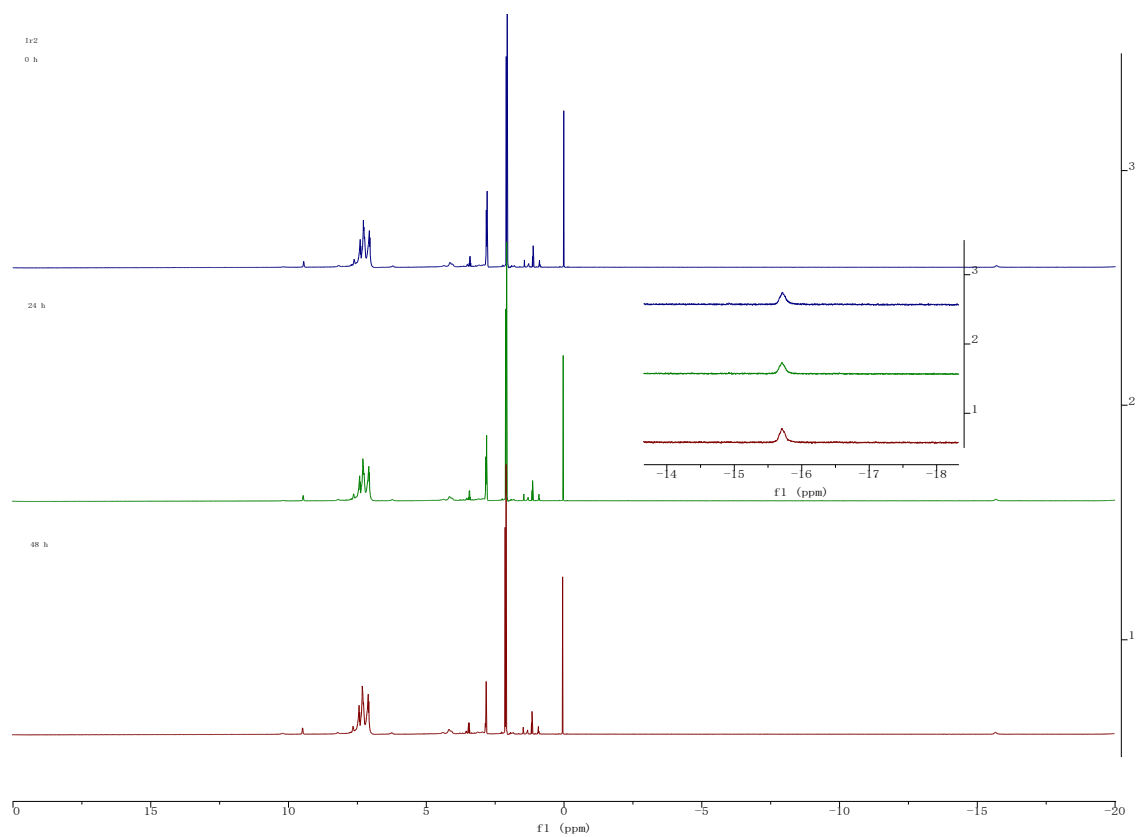

**Figure S5.** NMR spectra of Ir2 in 0 h, 24 h, and 48 h at 37°C.

## SUPPORTING INFORMATION

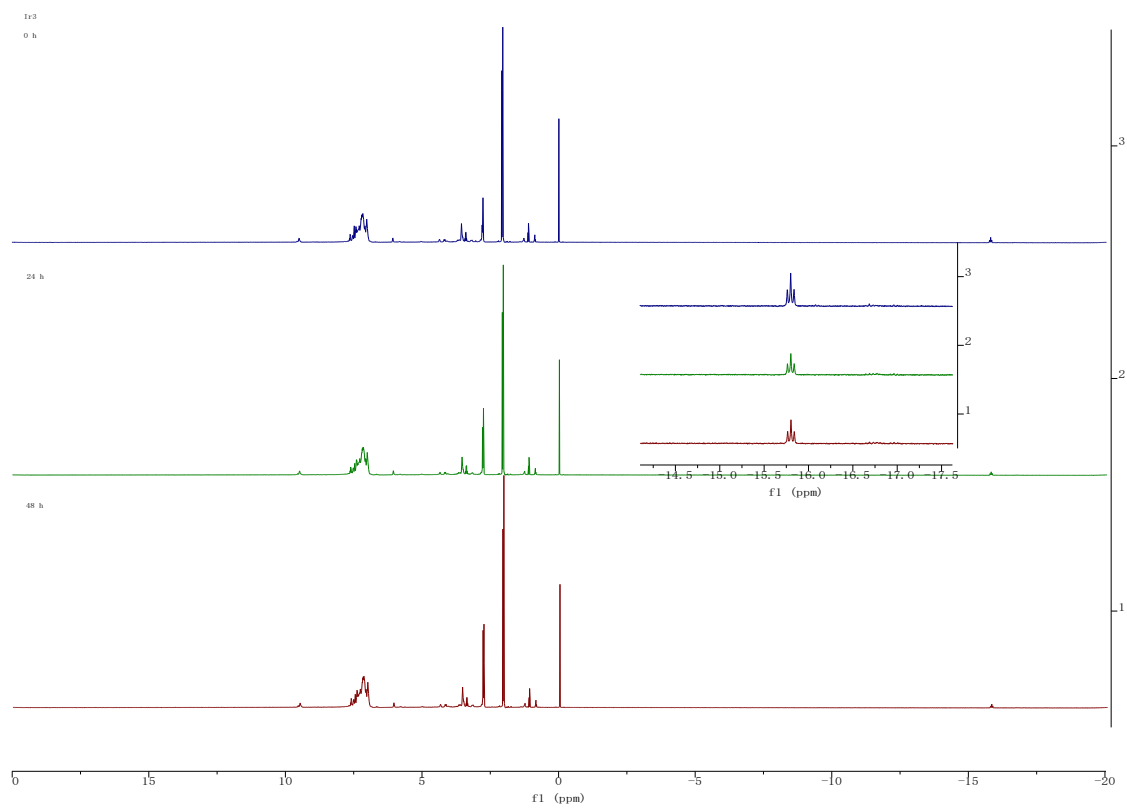

**Figure S6.** NMR spectra of Ir3 in 0 h, 24 h, and 48 h at 37°C.

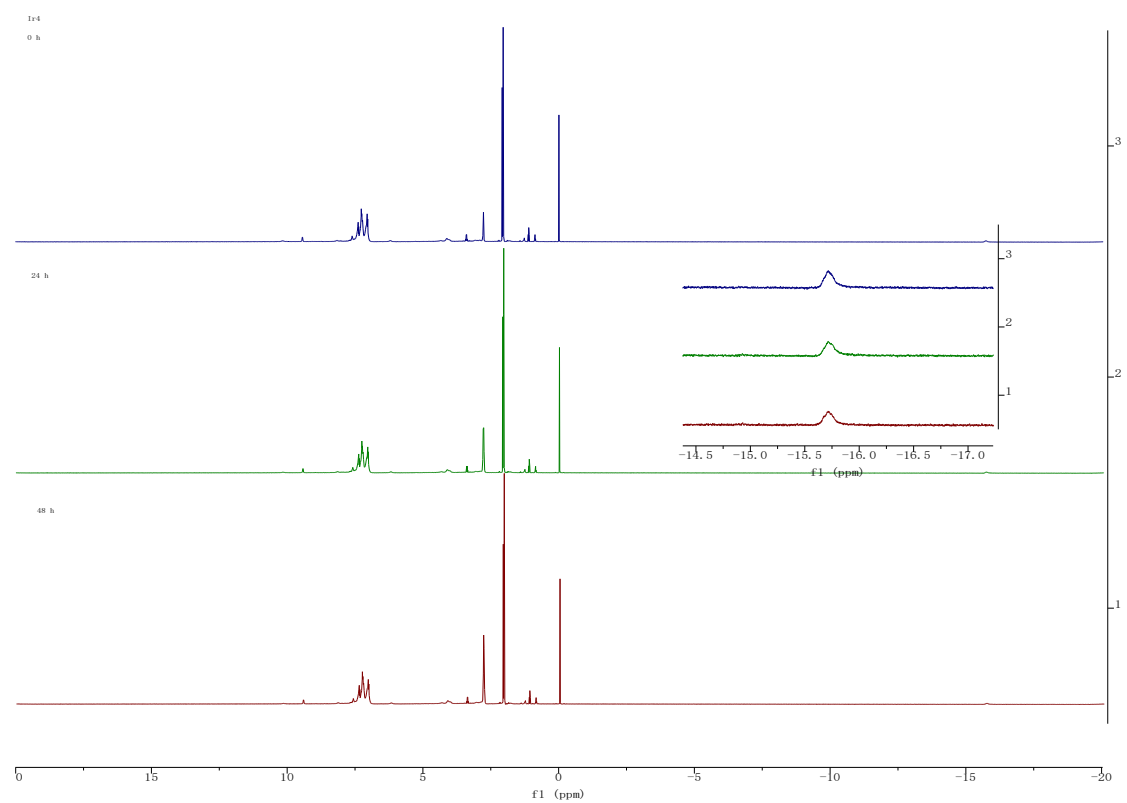

**Figure S7.** NMR spectra of Ir4 in 0 h, 24 h, and 48 h at 37°C.

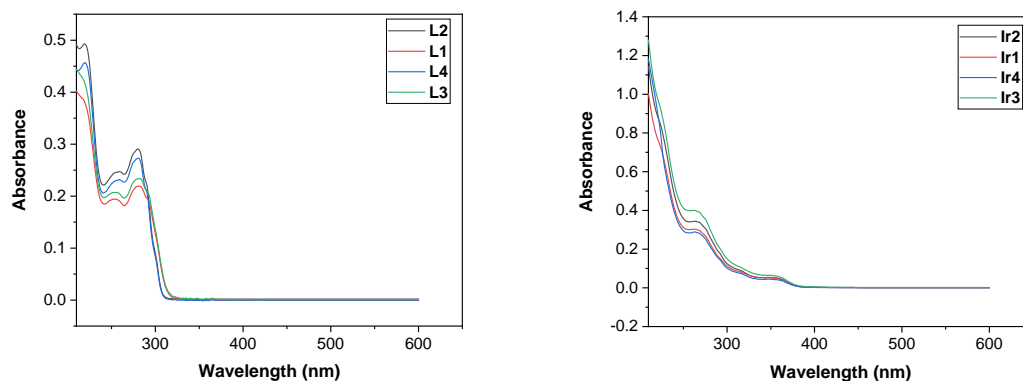

Figure S8. UV-Vis spectra of L1-4 and Ir1-4.

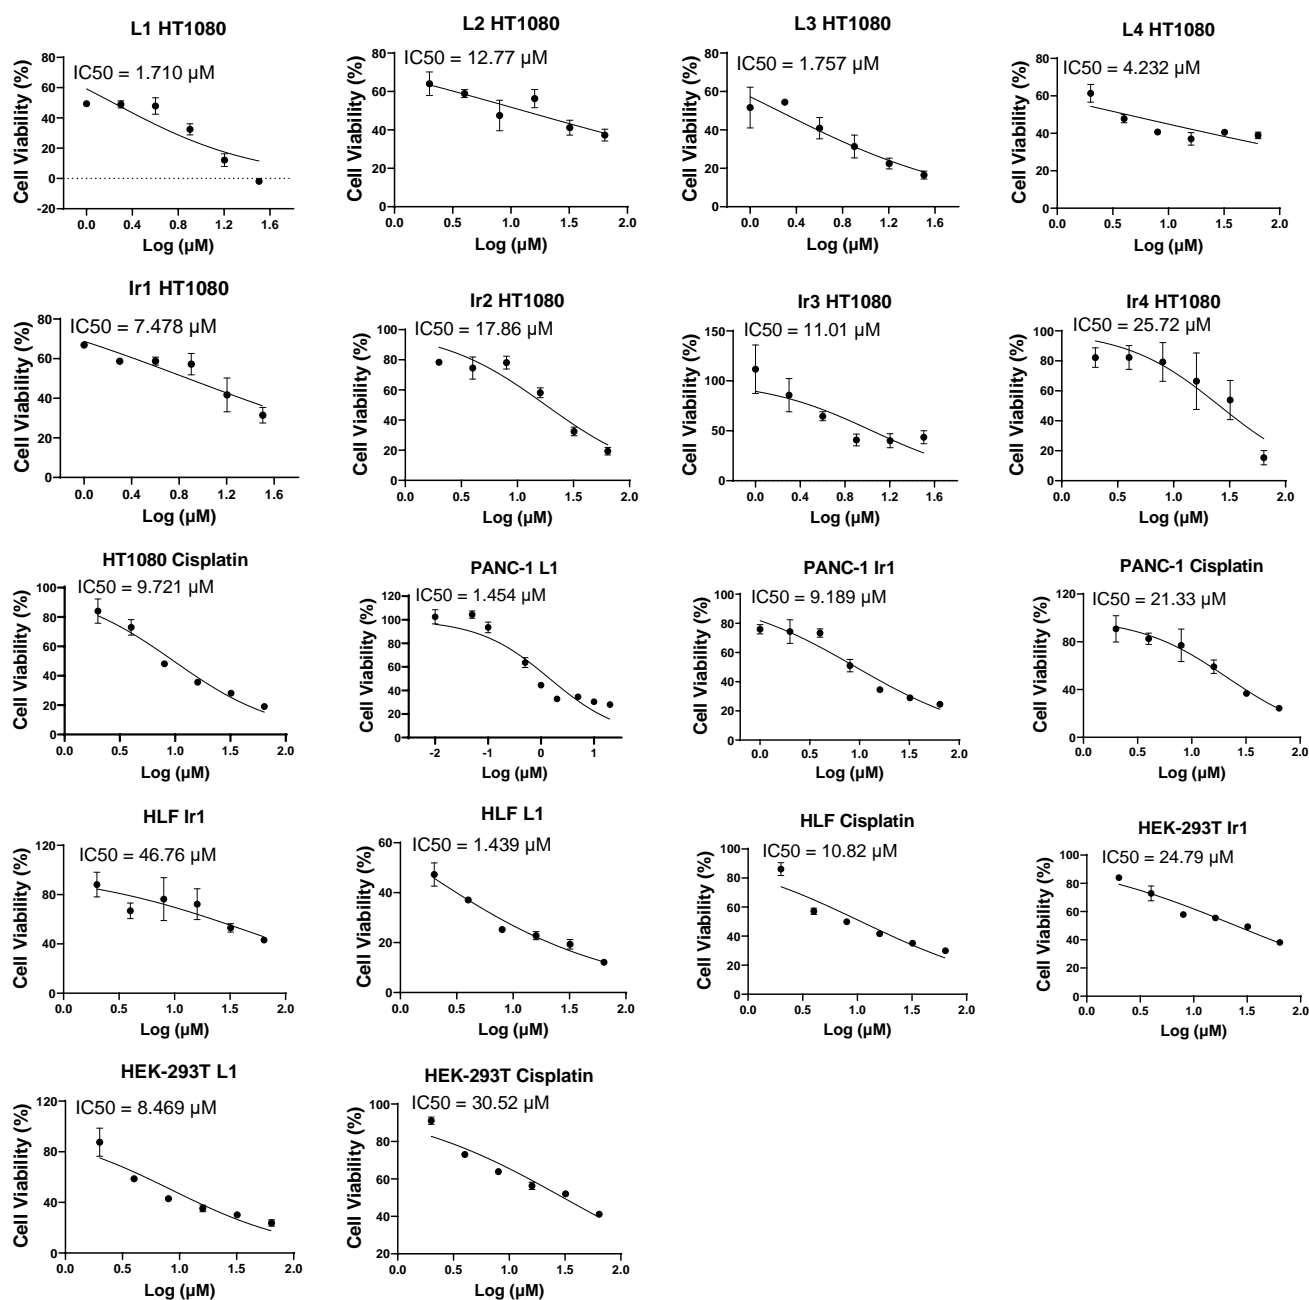

Figure S9. Dose response curves of all tested cellular toxicity.

## SUPPORTING INFORMATION

**Table S1.** IC50 ( $\mu\text{M}$ ) value of ligands and Ir(III) complexes towards HT1080 cells.

| IC50 ( $\mu\text{M}$ ) |       |       |
|------------------------|-------|-------|
| L2                     | L3    | L4    |
| 12.77                  | 1.76  | 4.23  |
| Ir2                    | Ir3   | Ir4   |
| 17.86                  | 11.01 | 25.72 |

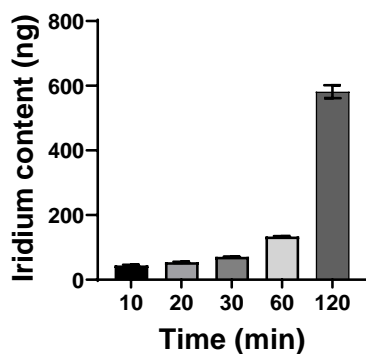

**Figure S10.** Cellular uptake of Ir1 during 120 min, the iridium content was count per  $5 \times 10^7$  cells.

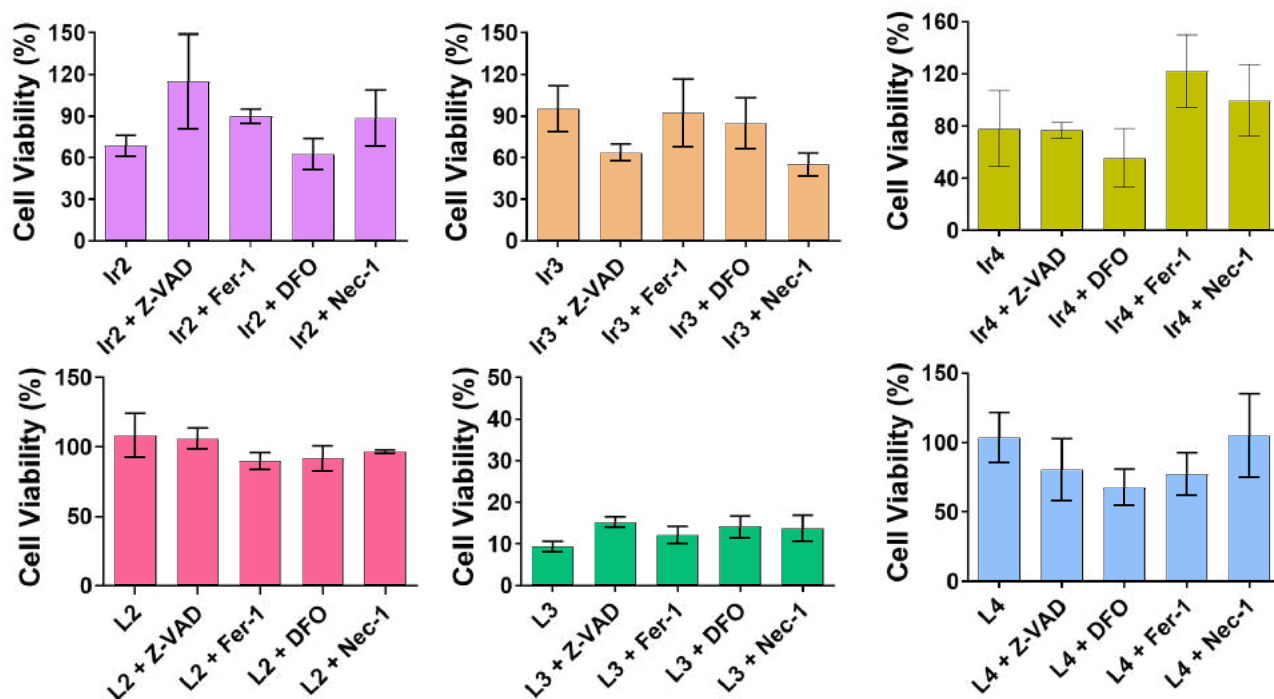

**Figure S11.** Viability of HT1080 cells treated with  $10 \mu\text{M}$  Ir-Py-RSL/ $1 \mu\text{M}$  ligand,  $10 \mu\text{M}$  Ir-RSL/ $1 \mu\text{M}$  ligand +  $20 \mu\text{M}$  Z-VAD,  $10 \mu\text{M}$  Ir-RSL/ $1 \mu\text{M}$  ligand +  $2 \mu\text{M}$  Fer-1,  $10 \mu\text{M}$  Ir-Py-RSL/ $1 \mu\text{M}$  ligand +  $40 \mu\text{M}$  DFO, and  $10 \mu\text{M}$  Ir-Py-RSL/ $1 \mu\text{M}$  ligand +  $25 \mu\text{M}$  Nec-1 for 48 h. Values are expressed as the mean  $\pm$  SD ( $n = 3$ ).

# SUPPORTING INFORMATION

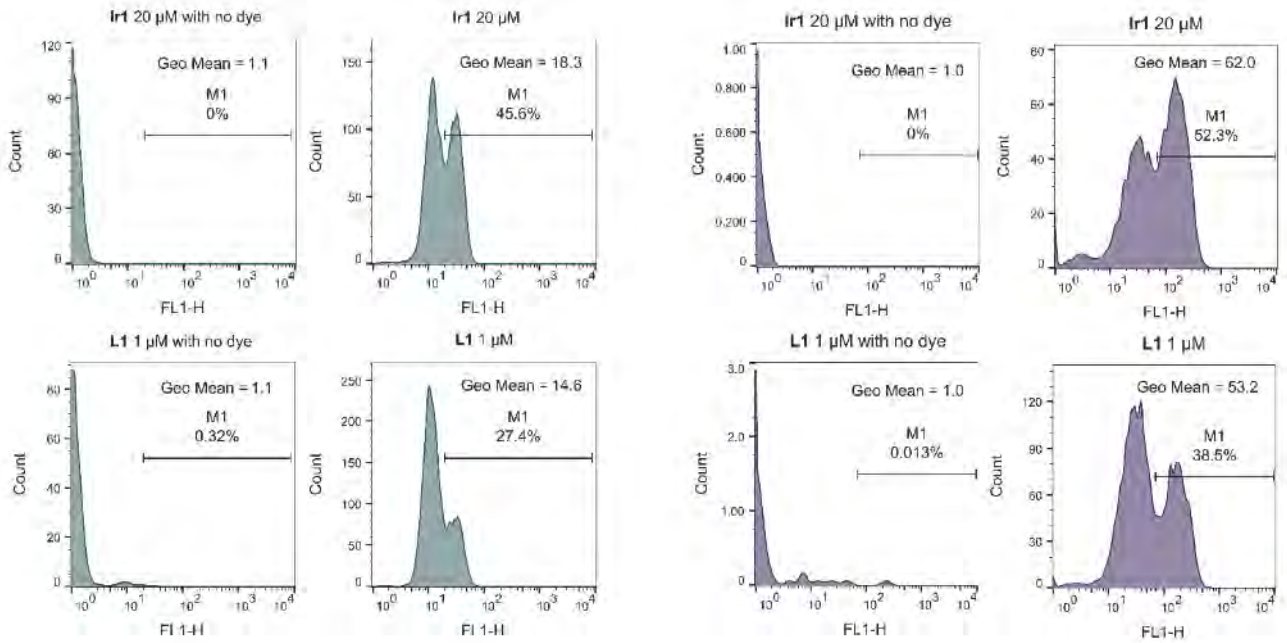

**Figure S12.** (Left) 1 μM L1 and 20 μM Ir1 with no dye, and lipid peroxidation in HT1080 cells treated with 1 μM L1 and 20 μM Ir1, determined by BODIPY-C11 staining via flow cytometry after 3 h incubation. (right) 1 μM L1 and 20 μM Ir1 with no dye, and ROS production in HT1080 cells treated with 1 μM L1 and 20 μM Ir1, determined by DCFH-DA staining after 3 h incubation.

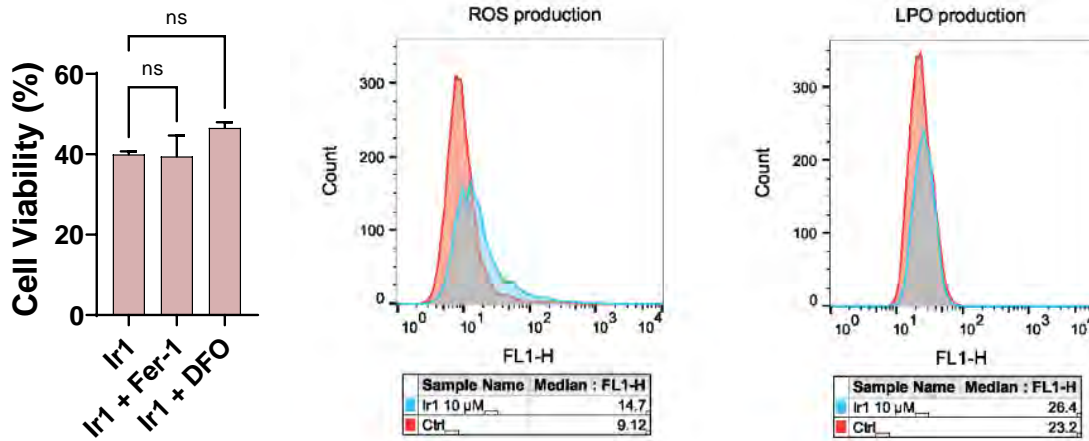

**Figure S13.** (Left) Viability of HLF cells treated with 10 μM Ir1, 10 μM Ir1 + 2 μM Fer-1, 10 μM Ir1 + 40 μM DFO for 48 h. (right) ROS and LPO production in HLF cells treated with 10 μM Ir1, determined by DCFH-DA and BODIPY-C11 staining respectively after 3 h incubation.



## SUPPORTING INFORMATION

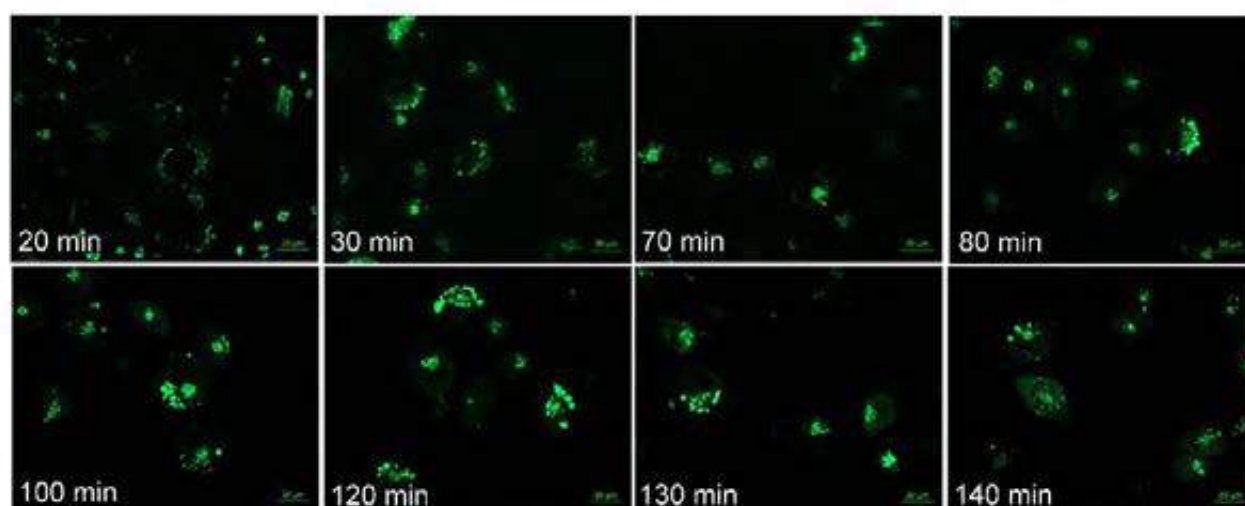

**Figure S14.** Microscope images of HT1080 cells at different time points after incubating with 10  $\mu$ M Ir1 ( $\lambda_{ex/em}$  = 488/510  $\pm$  20 nm); scale bar: 20  $\mu$ m.

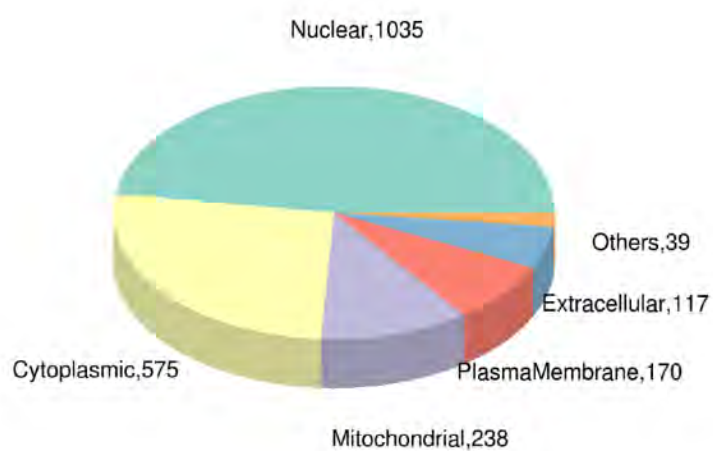

**Figure S15.** Subcellular localization of differentially expressed proteins of Ir1-treated HT1080 cells compared with PBS treated cells.

## SUPPORTING INFORMATION

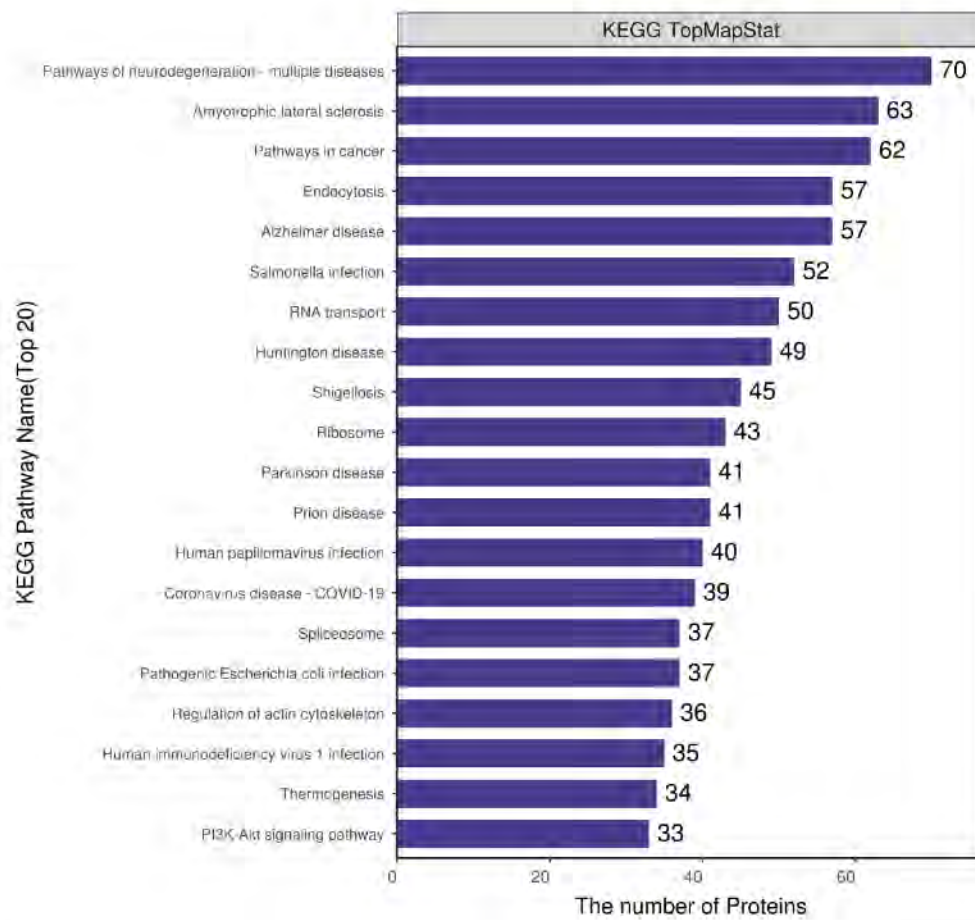

**Figure S16.** KEGG pathway annotation map of differentially expressed proteins (Top20) of Ir1-treated HT1080 cells compared with PBS treated cells.

# SUPPORTING INFORMATION

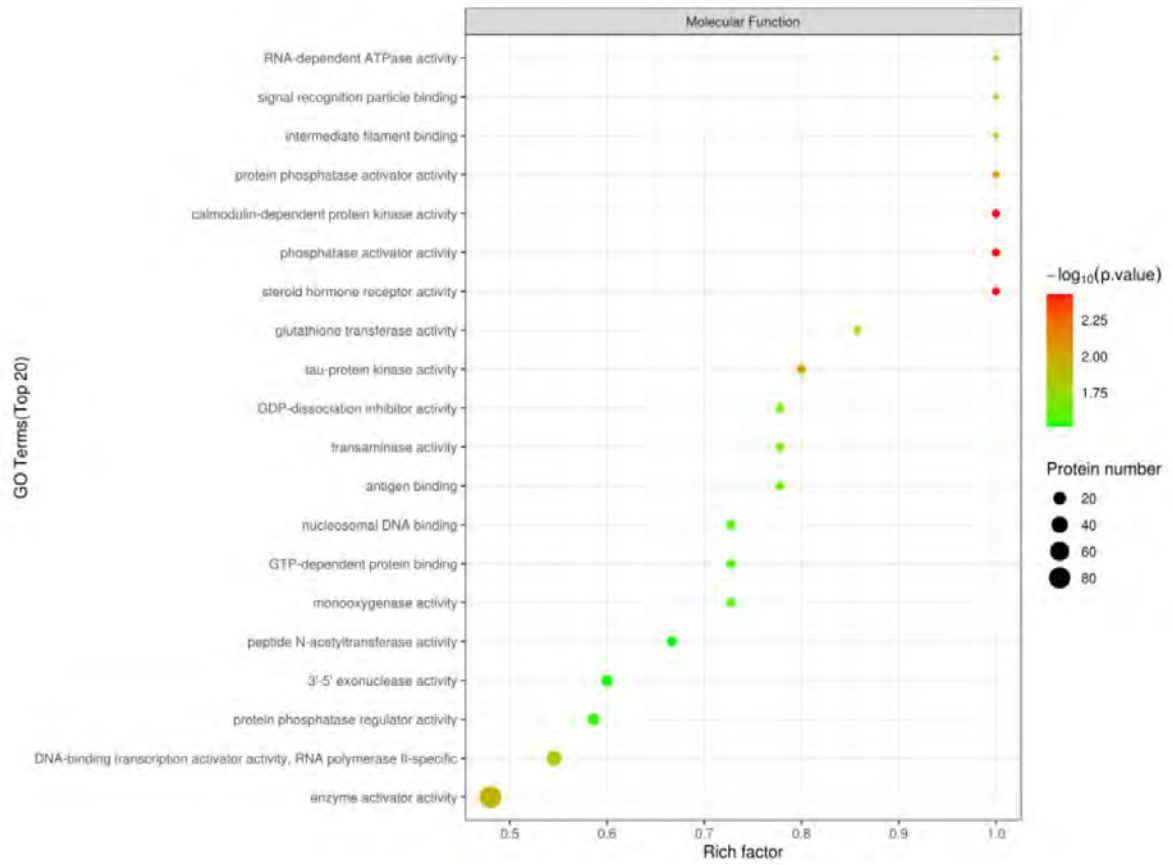

**Figure S17.** Group domain enrichment analysis diagram of molecular function between Ir1-treated HT1080 cells and PBS treated cells.

# SUPPORTING INFORMATION

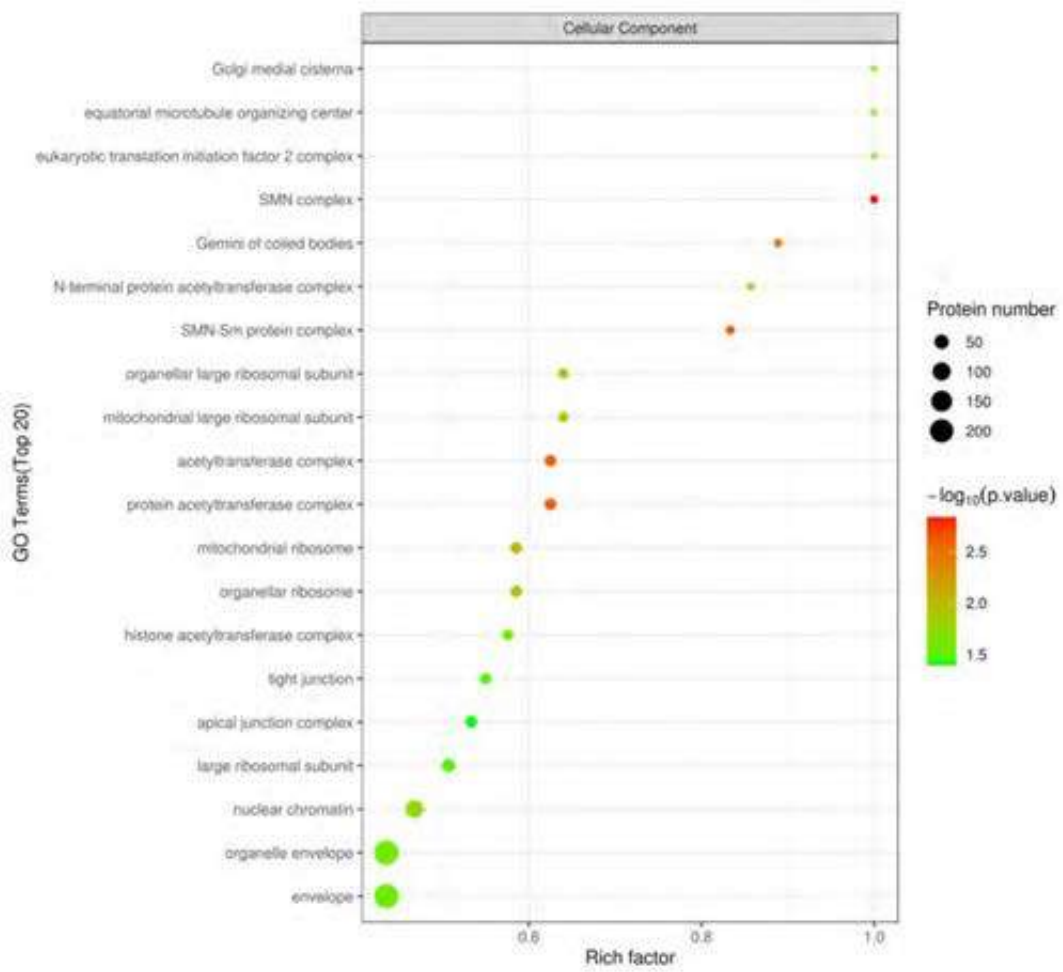

**Figure S18.** Group domain enrichment analysis diagram of cellular component between Ir1-treated HT1080 cells and PBS treated cells.

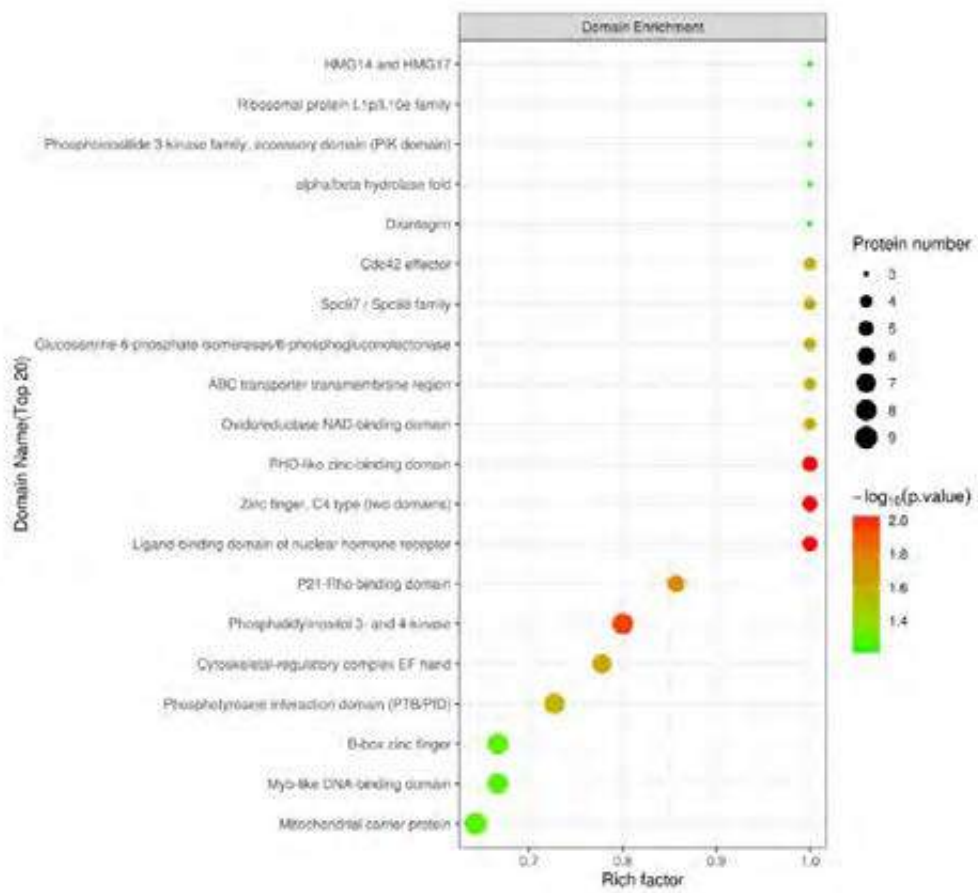

**Figure S19.** Group domain enrichment analysis diagram of protein domain between Ir1-treated HT1080 cells and PBS treated cells.

## SUPPORTING INFORMATION

**Table S2.** List of destroyed proteins in Ir1-treated HT1080 cells compared with PBS treated cells by lable-free Quantitative proteomics analysis.

| Protein name |       |       |       |       |       |       |       |       |       |       |       |       |       |       |
|--------------|-------|-------|-------|-------|-------|-------|-------|-------|-------|-------|-------|-------|-------|-------|
| DOPD         | RGPD3 | MYO9A | RBG10 | WASH6 | CK098 | AIP   | STXB3 | SMAP  | RB27B | PSMD9 | TAF4  | HIP1  | RPOM  | EF2K  |
| RTCA         | P3C2A | EXOC5 | PSDE  | ZN593 | BIN1  | SDCB1 | PIR   | MA2B1 | ACOD  | TRAD1 | UBFD1 | BORG1 | AP3D1 | DVL2  |
| GOSR2        | ADA10 | APAF  | TR10B | TNPO2 | GEMI2 | CSKP  | HGS   | AURKA | ZN609 | SYNJ2 | ANR28 | ARC1B | ARPC3 | TIF1A |
| PGRC2        | ACOX3 | RER1  | OGT1  | HMGB3 | IPO8  | PINL  | RPA34 | NUP42 | TTI1  | RFOX2 | ZW10  | TGF11 | CTIF  | VIP2  |
| PRPF3        | ERI3  | IF4G3 | HTRA2 | MS18B | MED7  | DENR  | TPPC3 | PRC1  | NDUB3 | BUB1  | MAAI  | SGTA  | LANC1 | STRN  |
| U3IP2        | IDH3B | KIF1C | ORC4  | PEX1  | ZN292 | SI1L3 | TBCD4 | GSDME | VINEX | EXOC3 | IMA7  | TPST2 | CCD22 | PQBP1 |
| OPHN1        | ABCB7 | CAPON | N4BP1 | OBSL1 | T22D2 | ZN217 | SH3L1 | TRIM3 | SPAG7 | KATL1 | PAGE1 | EED   | PRKRA | KS6A5 |
| ERAL1        | SPB7  | SURF6 | CRTAP | RENRR | RNH2A | CD123 | CBR3  | ATRNR | STAM2 | PIAS2 | SPF27 | SPF30 | CBPD  | GFPT2 |
| LTN1         | MYO1D | TOX4  | UFL1  | FRYL  | HAUS5 | RHBT3 | SOGA1 | WDR47 | AP2A2 | YIF1A | MFN2  | SPN1  | NDUA7 | ZRAB2 |
| SNX4         | KI20A | GOSR1 | CCDB1 | NDUAA | 6PGL  | ATG7  | TACC2 | ARI2  | PSMG1 | G6PE  | SC24A | SC24B | PPR3D | HERC2 |
| TTC4         | BAG3  | TRUB2 | BCL10 | NDUBA | PAK4  | NB5R3 | UROK  | TPA   | RASN  | LDLR  | TGFB1 | RAF1  | GLCM  | OAT   |
| ARLY         | PCCA  | IF4E  | TPM3  | CENPB | MCR   | NFIC  | STS   | TPM1  | TFPT  | JMJD7 | ERPG3 | TBA3C | ARAF  | MGST1 |
| GTR1         | GTR3  | EPB41 | BCR   | ACADM | ERR1  | HEM2  | CCNB1 | PO2F1 | QCR7  | PVR   | UCHL3 | NDKA  | GNS   | TIMP2 |
| CBR1         | BGAL  | FER   | NAGAB | PTN2  | NELFE | LFA3  | NDUV2 | RO52  | TFE3  | CSK22 | CCNA2 | IMDH1 | RASA1 | SDHB  |
| FBRL         | CBL   | MAOM  | PTPRG | DGKA  | CCND1 | COT2  | PPAC  | MYL9  | CDK2  | BRD2  | TNR6  | TYY1  | MK03  | MARK3 |
| P85A         | PSB8  | LYOX  | TEAD1 | RXRBR | ERCC5 | GRN   | T2EA  | SHC1  | 3MG   | BLVRB | 2AAB  | PURA2 | UFO   | AMRP  |
| GDIA         | RIR2  | ZEP2  | AKT2  | ELF1  | MRP1  | RFA3  | RFC1  | GDE   | ARL2  | HEM6  | TGFR1 | GPX4  | NUP62 | ZEB1  |
| SMBP2        | TXLNA | PBX2  | CETN2 | IPP2  | KPCI  | ACTY  | STAT6 | MTOR  | PI4KA | RBM34 | CDN2C | ECE1  | SATT  | SSRA  |
| RANG         | NAMPT | ACDSB | MK09  | IF2M  | GSTM5 | GNP11 | LIMS1 | PI42A | PSMD8 | KC1D  | DHYS  | UB2R1 | SRP09 | PCY1A |
| PPM1F        | PRI1  | NUMB  | HINT1 | GSK3B | TAF6  | MTHFS | GNAQ  | ERF   | MAP2  | KNTC1 | LRBA  | PAPOA | RT29  | DUS3  |
| SMCA2        | GALK1 | SSRD  | AL3A2 | SPHM  | VAMP7 | MAT1  | GDS1  | VAV2  | RBM5  | HXK2  | CRIP2 | TXTP  | ARFP2 | NUBP1 |
| MOT1         | DPOG1 | BLM   | UBP14 | HSP72 | IF5   | S12A2 | LAMB2 | SCOT1 | BID   | ATP5I | PEX3  | GEMI4 | NU107 | ARPC4 |
| RAB5B        | RAP2B | MAX   | PSME3 | MGN   | RHOA  | NAA20 | STXB1 | SUMO2 | UFM1  | AP1S1 | PP1A  | SELT  | TBPL1 | RS30  |
| GNAI1        | DYLT1 | CSK2B | TBA4A | SHP51 | CP4F2 | RPP38 | ADA17 | NUCB2 | RT34  | RT09  | COG7  | DAB2  | VLDLR | XIAP  |
| EFNB1        | TF2B  | CDK5  | CDK17 | BORG5 | FOXK2 | GALK2 | MEF2A | PYRD  | PLOD1 | TOP2B | KMT2A | CENPC | TAP1  | CEBPZ |
| TLE3         | CSTF1 | FAK1  | CTSL2 | P2R3A | GFPT1 | EXOS9 | SUH   | GABPA | TISB  | S20A2 | NCBP1 | EP300 | CPSF1 | TEF   |
| WASC5        | AKP13 | CDC20 | STX4  | TRAP1 | TRAF2 | PP1R8 | ABR   | CDC16 | CAF1B | LIPA1 | PRDX4 | DDX10 | SRSF6 | G3BP1 |
| IFIT5        | MTA1  | CTBP1 | PHLP  | RM49  | ORC2  | ADAM9 | FKBP5 | MTX1  | ASAH1 | ATR   | KCC2D | CUL4A | FCL   | RAB32 |
| FHL1         | FHL3  | LAMC2 | TBB2A | IDI1  | PEBB  | NFYC  | KGP1  | CDK13 | KCC1A | SCRB2 | DSG2  | SEPT6 | MORC3 | ARHG7 |
| MLEC         | TFDP1 | NPAT  | EI2BA | ITPR1 | ESPL1 | MDC1  | 2A5D  | MEF2D | ZN638 | CUL7  | SLMAP | NAA25 | PSMD6 | MO4L2 |
| CND1         | SUZ12 | SYLM  | SNX17 | RB3GP | DPOD3 | PCM1  | PTPA  | PWP2  | RABE1 | RBP1  | L2GL1 | TTF1  | ELOC  | DHC24 |
| PUM3         | KS6A1 | PP1R7 | SKIV2 | TRADD | TRIP6 | NAB2  | MSMO1 | ITSN1 | VPS72 | ETFD  | PKN2  | 2A5E  | MK14  | RM23  |
| SYPL1        | KCC4  | RBBP7 | TAF9  | MEA1  | CEGT  | KAT1  | CAH9  | NDUA9 | RTN1  | PCKGM | DGUOK | CL16A | AAK1  | TYSD1 |
| CTU2         | DB115 | TRM5  | EMAL3 | GRDN  | GLYR1 | VP26B | NAKD2 | TB10B | FA98B | FND3B | GPAT3 | NCBP3 | SNUT2 | P5CR3 |
| BOREA        | COBL1 | ACTBL | DCAF6 | YIF1B | HERC4 | PP6R3 | MTX3  | EMC4  | WDR44 | PCID2 | HABP4 | NU188 | FKB15 | HECD3 |
| CAMP1        | ACBD5 | WLS   | INT11 | CODA1 | AHDC1 | PR14L | RPRD2 | MYOME | BROX  | FOCAD | NAA35 | CARL1 | ZMYM4 | KANK2 |
| LPCT4        | TBC9B | ARID2 | HAUS3 | SLN13 | C19L1 | CYSA  | ATLA3 | IQEC1 | ZFAN6 | CNDH2 | LRC8E | RETST | RINT1 | NEPRO |
| ZCHC8        | M18BP | ERAP2 | S27A4 | TATD1 | EDC4  | SCYL2 | RHGBA | NFRKB | FAHD1 | RL22L | PDXD1 | INT5  | S27A1 | PSRC1 |
| TTC37        | TMM65 | IN80C | TRI65 | CC137 | S2547 | F111B | NHS   | MIC27 | PACS1 | HACD2 | KAT3  | YJ005 | S31E1 | CCD9B |
| TM1L2        | VP13C | RAPH1 | MOB2  | RS27L | INT8  | MARK2 | MEPCE | SYPM  | MAEA  | TAOK1 | 3BP5L | KDM3B | MICA3 | DYM   |
| RM21         | VP35L | POGZ  | MON2  | DHX29 | LRP10 | HDGR2 | RAI1  | CCD91 | SEN54 | KHDC4 | TMED4 | CENPV | T179B | TBCD1 |
| SETD3        | NOP9  | MTA70 | PB1   | YRDC  | SAPC2 | GP180 | COMD7 | CHD1L | NR2CA | CCD25 | PRSR2 | AROS  | ANKL2 | DDX42 |
| C2CD5        | HPS6  | RIOX2 | CCD71 | ERI1  | FMNL3 | FABD  | MGAP  | GCC2  | PHF6  | LRC8A | SKA3  | RM41  | RB12B | RPAP2 |
| PLPL6        | CKP2L | EXOC8 | TRI22 | P20D2 | KATL2 | MICU2 | AN13A | PHAR4 | TRM2A | RUSD2 | ABI1  | TTC5  | RPTOR | PORIM |
| NDUF2        | DOCK4 | INT1  | ABD12 | GPD1L | MILK1 | VPS8  | MPP5  | ZCHC9 | ARFG2 | KTAP2 | EFNMT | GPT11 | RM43  | ASCC1 |
| BANP         | ZBT38 | AVL9  | XXLT1 | SUMF2 | PGLT1 | UBAC2 | DHB11 | ATAD1 | SCPD1 | NOA1  | NECP1 | FA98A | SEN2  | PDPR  |
| Z280C        | EHPB1 | PHC3  | NGDN  | DP13B | NAV1  | PPHLN | SYNE1 | UBP32 | ARI1B | NUP37 | NEDD1 | SNIP1 | FBX30 | PUM2  |
| GOGA5        | UBA3  | RDH11 | LRC20 | TRPM4 | DMXL2 | GNPI2 | LRC8C | RBCC1 | MICA1 | GEMIS | PARD3 | PP4R1 | UBS3B | ZC3HF |

## SUPPORTING INFORMATION

|       |       |       |       |       |       |       |       |       |       |       |       |       |       |       |
|-------|-------|-------|-------|-------|-------|-------|-------|-------|-------|-------|-------|-------|-------|-------|
| TF3C2 | TB22A | RAB2B | CHPT1 | F172A | CHUR  | TM263 | CO040 | CTF18 | LEO1  | DCAKD | PHIP  | ATRIP | PSPC1 | SYNE2 |
| TITIN | TM158 | LZIC  | IRGQ  | PSMF1 | SNX19 | TM9S4 | PRP16 | RT31  | AKAP1 | AN32B | NECT2 | PGTA  | PRCC  | ARC1A |
| STAM1 | DPF3  | SYMPK | GGH   | COR2A | CELF1 | UFD1  | SMRD2 | GCDH  | TNPO1 | UBP13 | KPBB  | SCAM4 | HPS3  | SMCE1 |
| YIPF5 | PIGT  | ZN622 | WBP2  | LFG3  | CCD47 | SYAP1 | SO4A1 | SKA1  | OTUL  | ZN775 | ATG2B | FBXL8 | ACSF2 | GCC1  |
| FXRD1 | GCP3  | OTUB2 | SNR40 | ATG4C | SPDLY | SIR1  | YIPF6 | SEH1  | RM53  | RNF31 | MITOK | SGF29 | DNJA3 | MB12A |
| MMAB  | CYFP2 | CDCA5 | DYL2  | OTUB1 | HMCES | CKLF7 | DUS3L | LTV1  | AURKB | TOE1  | A7L3B | MTNB  | ZCCHL | PRR11 |
| GRM2B | SAHH3 | GMPPA | SC22A | ATPMD | MET2A | ITCH  | KIRR1 | WNK4  | CK5P3 | VPS39 | VPS50 | VCIP1 | ELMO2 | TMX3  |
| ZFP91 | CLMN  | BT3L4 | DNJC1 | EHMT2 | EP400 | NSUN5 | ARAP1 | TPPC9 | SMG1  | TM237 | KI20B | UIF   | MAGI1 | SPAG5 |
| NACC1 | VP13A | EFGM  | ERBIN | MTL26 | PRPK  | WRIP1 | RANB9 | PKHF1 | SMC6  | TM209 | CP251 | IWS1  | SIN3A | RSF1  |
| RBM15 | MINT  | CYH2  | PCY2  | NEUR1 | SORT  | DNJC2 | SCAFB | TTC1  | RGPD5 | DOK1  | PI51A | S29A1 | FOXC2 | GDF15 |
| ARPSL | CMS1  | MEP50 | APOL2 | NUD12 | BUD13 | RM45  | CG050 | CAB45 | PDD2L | PYM1  | MIC25 | RIOK1 | LLPH  | SLD5  |
| NTPCR | GCP2  | UBAC1 | EFC4B | CHCH5 | CNPY3 | MTG1  | PSMG3 | FSD1  | TBCD  | THTPA | ISCA1 | PDC10 | EFHD1 | DDX23 |
| BDH2  | MTND  | RN126 | CP250 | PBDC1 | TMED9 | SPA5L | RIOK2 | TMUB1 | NUP85 | HIRP3 | YJU2  | NUDT9 | REPI1 | RPAP1 |
| SF3B5 | PAPOG | NADAP | RFIP5 | B2L13 | HDHD5 | MAK16 | CADM1 | RM13  | RM04  | RM01  | NEUL  | SETD2 | ASPC1 | OSBL8 |
| OSBL6 | RAB34 | WDR11 | EDEM3 | TRIM5 | ZDHC5 | UBE2O | WDR33 | YIPF3 | REXO4 | CTDS1 | IF5A2 | MFF   | UBA5  | T126A |
| SP130 | CSTFT | CYRIA | MAGT1 | SMG9  | ING2  | TMX4  | ASCC2 | ISCU  | ATG5  | VPS16 | VPS11 | PPII3 | PDCL3 | TAOK3 |
| ADNP  | RM46  | BACD3 | TCAL2 | NELFA | BORG4 | OSGP2 | DEFI6 | TRABD | SEN3  | CC134 | CCD86 | MYH16 | DHX33 | YTDC2 |
| ES8L2 | RPAP3 | ALG9  | LDAH  | RANB3 | PEAK1 | AAMDC | DOCK5 | TDRD3 | AT133 | SFR19 | GEM17 | MINY3 | JUPI2 | GHC1  |
| SPE39 | COG4  | CSN7B | KT3K  | SYCM  | UBTD1 | MYG1  | RISC  | ZFYV1 | TENS1 | S38AA | TM165 | EPG5  | MSL2  | PLXA4 |
| SYF1  | PREB  | SSU72 | SYSM  | MYNN  | EXOS4 | UBE2T | CHSTB | OSGEP | DMAP1 | DCP1A | LZTL1 | TIGAR | CYLD  | RPR1B |
| MYO5C | SAS10 | DBLOH | AAAS  | ABCBA | BAZ1A | METL5 | UBQL4 | PLCC  | LANC2 | F207A | BMP2K | ABHDA | T106B | ABCF3 |
| CC50A | PARVA | TBC13 | INT13 | WDR70 | PHAG1 | PK1IP | OXSM  | RM22  | CZIB  | HPF1  | TM160 | NHP2  | OCAD1 | MARH5 |
| IMPA3 | SIR5  | NSMA3 | NDE1  | QPCTL | DJB12 | ALKB4 | NSE4A | TE2IP | RM39  | TMOD3 | MS18A | GTSE1 | ERAP1 | ARP10 |
| USE1  | TLS1  | SMAL1 | SPG21 | PTTG2 | MTCH1 | ITSN2 | NOP53 | EHD3  | ARHGC | CNOT2 | MPP6  | CHMP5 | CRIPT | HACD3 |
| PDP1  | SEN3  | SH3B4 | SEP10 | RELCH | UBP36 | STK26 | ARMX1 | ZNFX1 | CPSF2 | ANFY1 | HOP2  | MBD2  | NCDN  | TFP11 |
| MTRR  | SPAST | GRHPR | CATZ  | MO4L1 | ZMYM2 | DIC   | MALT1 | CFDP1 | ADDG  | ABCF2 | AAKG2 | GCP4  | SYWM  | DPOLL |
| Z3H7B | TCF20 | NDRG3 | ARMX3 | SUN2  | TBK1  | PCYOX | DDX20 | SHPK  | BAP29 | NB5R1 | S30BP | PRAF1 | TAGL3 | BAZ2A |
| PSIX4 | PLXA1 | NGAP  | CMC2  | DDX41 | APC7  | APC4  | GGA1  | TASOR | PTBP2 | CPSF3 | BORG2 | TF3C4 | NUP50 | CNO11 |
| DSE   | BAG5  | DNPEP | NWD2  | YETS2 | ISY1  | KMT2B | SYNRG | PCDGG | CHIP  | MINP1 | S12A4 | EXOC7 | ZC3H4 | FOXJ3 |
| HP55  | NEUR3 | SCML2 | ZN148 | MTMR6 | GLCNE | PIN4  | PSF2  | CNPY2 | OFUT2 | DLGP4 | SAC2  | WDR37 | RRP44 | LRCH1 |
| RCL1  | GSTK1 | RT07  | PDIP2 | COG6  | TMX2  | LSM2  | PHOCN | RM11  | CIA2B | PTH2  | STA13 | T22D4 | ZN330 | RL36  |
| TRRAP | C170B | ARI1  | RN114 | PPME1 | RBM7  | TIM22 | PAXB1 | CERT  | TF3C3 | RBM8A | SNX11 | TRUA  | NCOR2 | ALG5  |
| FKBP7 | GMEB1 | SPCS1 | MTCH2 | BIG2  | MD1L1 | TAF6L | NEMO  | S4A7  | NCOA3 | NUMBL | M3K4  | DDX49 | MORC2 | S23IP |

## SUPPORTING INFORMATION

**Table S3.** The significant difference proteins (fold change > 2.0, P value<0.05) in Ir1-treated HT1080 cells compared with PBS treated cells by label-free Quantitative proteomics analysis. Statistical significance was assessed using Student's *t*-test.

| Protein | Gene Name | Unique Peptides | Ir-RSL/Ctrl | t test p value |
|---------|-----------|-----------------|-------------|----------------|
| Q16777  | H2AC20    | 1               | 16.62540833 | 0.027167133    |
| O95391  | SLU7      | 5               | 14.67911937 | 0.005294149    |
| Q96MX6  | WDR92     | 2               | 13.10224283 | 0.000353459    |
| Q96BR5  | COA7      | 3               | 11.43761384 | 0.008945779    |
| P35580  | MYH10     | 14              | 10.40871386 | 0.023072019    |
| Q92922  | SMARCC1   | 3               | 9.929590717 | 0.000149806    |
| Q9ULX6  | AKAP8L    | 3               | 9.918802532 | 0.000309694    |
| P43304  | GPD2      | 7               | 9.104018798 | 0.000095509    |
| Q8TDX7  | NEK7      | 2               | 8.032643892 | 0.012957685    |
| Q9Y5L4  | TIMM13    | 1               | 7.797441984 | 0.003116738    |
| Q641Q2  | WASHC2A   | 7               | 7.240243523 | 0.029744064    |
| Q2TAY7  | SMU1      | 9               | 7.21591588  | 0.015295377    |
| Q9BUJ2  | HNRNPUL1  | 10              | 7.136205867 | 0.007828943    |
| P84103  | SRSF3     | 4               | 7.122423833 | 0.036619981    |
| O96008  | TOMM40    | 3               | 7.037985941 | 0.000927857    |
| Q13555  | CAMK2G    | 1               | 6.866203513 | 0.014373597    |
| P49840  | GSK3A     | 1               | 6.680996127 | 0.023505224    |
| P05387  | RPLP2     | 7               | 6.645033717 | 0.006435894    |
| Q14699  | RFTN1     | 5               | 6.542045413 | 0.001209736    |
| O75691  | UTP20     | 10              | 6.353161118 | 0.003055572    |
| O60573  | EIF4E2    | 1               | 6.236239708 | 0.005862549    |
| O14907  | TAX1BP3   | 3               | 6.235929303 | 0.000081558    |
| Q9H1E3  | NUCKS1    | 3               | 6.176145827 | 0.002463717    |
| Q9NX63  | CHCHD3    | 8               | 6.113241934 | 0.005857611    |
| Q9UJM3  | ERRF1     | 1               | 6.065053482 | 0.024537848    |
| Q08945  | SSRP1     | 6               | 6.028221816 | 0.000638651    |
| P78318  | IGBP1     | 5               | 6.008981112 | 0.03240828     |
| Q9UL25  | RAB21     | 2               | 5.933701388 | 0.008741182    |
| P49207  | RPL34     | 5               | 5.784685539 | 0.000967468    |
| Q3MHD2  | LSM12     | 2               | 5.511713237 | 0.028423949    |
| P62304  | SNRPE     | 1               | 5.346643016 | 2.421109823    |
| P61006  | RAB8A     | 3               | 5.164647116 | 0.001561588    |
| Q13011  | ECH1      | 3               | 5.114015685 | 0.004935692    |
| P05120  | SERPINB2  | 5               | 5.110852999 | 0.007929302    |
| Q9UKY7  | CDV3      | 8               | 5.005933977 | 0.038353935    |
| Q8TAT6  | NPLOC4    | 7               | 4.959348776 | 0.010131656    |
| P09132  | SRP19     | 3               | 4.953895324 | 0.028924156    |
| P61981  | YWHAG     | 9               | 4.914045012 | 0.005633992    |
| Q15813  | TBCE      | 4               | 4.882023374 | 0.001928653    |
| P08621  | SNRNP70   | 8               | 4.856826774 | 0.000177945    |
| P35269  | GTF2F1    | 8               | 4.852224129 | 0.015621569    |
| O75844  | ZMPSTE24  | 3               | 4.810259838 | 0.003366096    |
| O95816  | BAG2      | 7               | 4.748127062 | 0.000186467    |
| Q9Y5J1  | UTP18     | 4               | 4.744172308 | 0.049915657    |
| Q5BJE1  | CCDC178   | 2               | 4.517137796 | 0.000102712    |
| Q6SPF0  | SAMD1     | 4               | 4.475980522 | 0.049435603    |
| Q5VTU8  | ATP5F1EP2 | 2               | 4.460077063 | 0.000206171    |
| Q9NPL8  | TIMMDC1   | 2               | 4.43575671  | 0.0065032      |
| Q86U42  | PABPN1    | 6               | 4.385992674 | 0.014255112    |
| P27824  | CANX      | 15              | 4.384086504 | 0.012327278    |
| Q9H330  | TMEM245   | 1               | 4.342399228 | 0.024326705    |
| Q14696  | MESD      | 3               | 4.25716511  | 0.002302258    |
| O76021  | RSL1D1    | 20              | 4.221954878 | 0.002058074    |
| P41227  | NAA10     | 4               | 4.214555279 | 0.000778229    |
| P05386  | RPLP1     | 1               | 4.196495903 | 0.001924115    |
| Q16637  | SMN1      | 2               | 4.189617819 | 0.000058047    |
| Q68EM7  | ARHGAP17  | 5               | 4.189420652 | 0.003161216    |
| Q96159  | NARS2     | 1               | 4.136109157 | 0.001910123    |
| P51148  | RAB5C     | 3               | 4.102296382 | 0.002948386    |



## SUPPORTING INFORMATION

|        |          |    |             |             |
|--------|----------|----|-------------|-------------|
| Q15428 | SF3A2    | 3  | 4.095785009 | 0.015766272 |
| P10109 | FDX1     | 1  | 4.085991357 | 0.000356373 |
| P23588 | EIF4B    | 21 | 4.055036366 | 0.001554749 |
| Q99623 | PHB2     | 12 | 4.049809249 | 0.021721839 |
| P30084 | ECHS1    | 5  | 4.025743805 | 0.041875977 |
| Q96AG4 | LRRC59   | 7  | 4.010878285 | 0.015344837 |
| P00441 | SOD1     | 5  | 3.980683984 | 0.02327747  |
| P60709 | ACTB     | 1  | 3.963858026 | 0.003738997 |
| P45880 | VDAC2    | 8  | 3.942400114 | 0.015722572 |
| A110T0 | ILVBL    | 3  | 3.898243886 | 0.00923444  |
| Q92769 | HDAC2    | 4  | 3.880935792 | 0.003114828 |
| Q9UMY1 | NOL7     | 1  | 3.873440379 | 0.004886284 |
| P61106 | RAB14    | 6  | 3.861018234 | 0.006145315 |
| Q9UI10 | EIF2B4   | 7  | 3.858971028 | 0.006189137 |
| Q9BYG3 | NIFK     | 6  | 3.807547544 | 0.027056012 |
| P11233 | RALA     | 4  | 3.801051039 | 0.000189935 |
| Q14011 | CIRBP    | 2  | 3.790512178 | 0.005103725 |
| Q15291 | RBBP5    | 3  | 3.773812261 | 0.000447535 |
| Q06323 | PSME1    | 6  | 3.765708135 | 0.012566361 |
| P26196 | DDX6     | 5  | 3.744091014 | 0.026699706 |
| Q16698 | DECR1    | 4  | 3.732471546 | 0.000874143 |
| P54709 | ATP1B3   | 5  | 3.670885545 | 0.014617354 |
| Q92804 | TAF15    | 5  | 3.653500227 | 0.008635344 |
| P18887 | XRCC1    | 6  | 3.635476652 | 0.011828403 |
| Q9NQT5 | EXOSC3   | 1  | 3.633107562 | 0.000023843 |
| P63220 | RPS21    | 3  | 3.580544897 | 0.008474961 |
| Q9BQ52 | ELAC2    | 3  | 3.558224533 | 0.02758849  |
| Q96N66 | MBOAT7   | 4  | 3.549474905 | 0.005524467 |
| P51159 | RAB27A   | 4  | 3.53303708  | 0.002373524 |
| Q9Y3B2 | EXOSC1   | 2  | 3.518504815 | 0.019830164 |
| P05114 | HMG1N1   | 5  | 3.508359592 | 0.01039766  |
| Q9Y5Y2 | NUBP2    | 1  | 3.493325794 | 0.000303214 |
| P62820 | RAB1A    | 3  | 3.49088243  | 0.005168472 |
| O60341 | KDM1A    | 6  | 3.465199515 | 0.024381544 |
| O00541 | PES1     | 9  | 3.423289757 | 0.030688582 |
| Q9BZK7 | TBL1XR1  | 6  | 3.411364915 | 0.029951966 |
| Q9NZL4 | HSPBP1   | 4  | 3.399524975 | 0.009119014 |
| Q02218 | OGDH     | 9  | 3.39606616  | 0.044592702 |
| P33316 | DUT      | 6  | 3.390159323 | 0.002899408 |
| Q15286 | RAB35    | 3  | 3.384742259 | 0.010824102 |
| Q9NQT4 | EXOSC5   | 2  | 3.377476483 | 0.000013401 |
| P08579 | SNRPB2   | 3  | 3.370441748 | 0.000835779 |
| Q9Y5Q8 | GTF3C5   | 2  | 3.342121174 | 0.011847329 |
| Q9UI09 | NDUFA12  | 2  | 3.337334682 | 0.022593136 |
| O00148 | DDX39A   | 3  | 3.319533363 | 0.003689435 |
| Q9HAV0 | GNB4     | 2  | 3.317022242 | 0.00308352  |
| Q9UKV3 | ACIN1    | 21 | 3.304002419 | 0.037411338 |
| Q9P121 | NTM      | 4  | 3.288097013 | 0.026691039 |
| P36957 | DLST     | 10 | 3.273095144 | 0.009031258 |
| P07305 | H1-0     | 7  | 3.269579555 | 0.000065335 |
| Q92522 | H1-10    | 5  | 3.256488003 | 0.000135097 |
| P08559 | PDHA1    | 6  | 3.253652015 | 0.002052639 |
| P20645 | M6PR     | 4  | 3.235379955 | 0.00144049  |
| Q16836 | HADH     | 4  | 3.235178971 | 0.000151679 |
| Q16643 | DBN1     | 12 | 3.229570579 | 0.000907126 |
| Q9C0D9 | SELENOI  | 1  | 3.18370573  | 0.000057449 |
| P55327 | TPD52    | 4  | 3.178208227 | 0.00736893  |
| Q9NQ55 | PPAN     | 6  | 3.176586049 | 0.006049841 |
| Q12797 | ASPH     | 12 | 3.166477942 | 0.020358318 |
| PODP25 | CALM3    | 10 | 3.158111393 | 0.009403645 |
| P80723 | BASP1    | 8  | 3.141962252 | 0.002280066 |
| Q96GX5 | MASTL    | 2  | 3.131990764 | 0.019966798 |
| P50454 | SERPINH1 | 4  | 3.131236142 | 0.029035571 |

## SUPPORTING INFORMATION

|        |          |    |             |             |
|--------|----------|----|-------------|-------------|
| P06756 | ITGAV    | 6  | 3.097270847 | 0.003733708 |
| Q14146 | URB2     | 4  | 3.084550454 | 0.00313124  |
| P07910 | HNRNPC   | 16 | 3.043287748 | 0.002583225 |
| P26599 | PTBP1    | 9  | 3.036238587 | 0.038670014 |
| P05204 | HMG2     | 7  | 3.023422479 | 0.000503962 |
| O43164 | PJA2     | 5  | 3.022274345 | 0.006291585 |
| Q9H0D6 | XR2      | 8  | 3.009336014 | 0.002398702 |
| Q9Y266 | NUDC     | 15 | 2.991826182 | 0.004065602 |
| O00139 | KIF2A    | 3  | 2.982874774 | 0.022974373 |
| Q10471 | GALNT2   | 6  | 2.975032306 | 0.031072744 |
| Q07666 | KHDRBS1  | 5  | 2.967468479 | 0.009006735 |
| Q0VDF9 | HSPA14   | 4  | 2.961967292 | 0.000265416 |
| Q8N1G2 | CMTR1    | 4  | 2.960819582 | 0.000879877 |
| Q9H0U4 | RAB1B    | 3  | 2.949965827 | 0.031781907 |
| Q9Y3L3 | SH3BP1   | 6  | 2.945997016 | 0.017329923 |
| Q8IVL6 | P3H3     | 5  | 2.929936975 | 0.002767323 |
| P04183 | TK1      | 3  | 2.913901642 | 0.004343424 |
| P60660 | MYL6     | 7  | 2.902991504 | 0.000729672 |
| Q9BWD1 | ACAT2    | 4  | 2.902366165 | 0.001772982 |
| Q96FQ6 | S100A16  | 1  | 2.896526632 | 0.048674009 |
| Q71UI9 | H2AZ2    | 2  | 2.886507339 | 0.015215503 |
| Q9BWM7 | SFXN3    | 5  | 2.885568554 | 0.000724473 |
| P13010 | XRCC5    | 15 | 2.869164765 | 0.000442202 |
| Q9Y5V0 | ZNF706   | 1  | 2.833020179 | 0.049211942 |
| Q9NR12 | PDLIM7   | 7  | 2.830574376 | 0.027299805 |
| P31946 | YWHAB    | 7  | 2.828184979 | 0.027199421 |
| Q13263 | TRIM28   | 21 | 2.823978727 | 0.000213448 |
| Q9Y6I3 | EPN1     | 3  | 2.822677248 | 0.001568929 |
| P56182 | RRP1     | 6  | 2.80669766  | 0.028420138 |
| P17812 | CTPS1    | 8  | 2.805873158 | 0.009412645 |
| P20962 | PTMS     | 2  | 2.804129802 | 0.003393856 |
| Q9Y3E0 | GOLT1B   | 2  | 2.796450018 | 0.000193894 |
| O95747 | OXSR1    | 5  | 2.789489646 | 0.007534983 |
| Q7Z2K6 | ERMP1    | 3  | 2.781322477 | 0.034376662 |
| Q13185 | CBX3     | 6  | 2.774047877 | 0.025674214 |
| P49406 | MRPL19   | 2  | 2.769395341 | 0.00047136  |
| P07237 | P4HB     | 22 | 2.746697642 | 0.000104834 |
| Q9HCG8 | CWC22    | 5  | 2.744892106 | 0.021433546 |
| P38159 | RBMX     | 4  | 2.734684142 | 0.002478576 |
| Q05682 | CALD1    | 19 | 2.732917458 | 0.016635522 |
| P11387 | TOP1     | 11 | 2.729258581 | 0.022392219 |
| P37235 | HPCAL1   | 3  | 2.723829894 | 0.010683153 |
| P84085 | ARF5     | 3  | 2.719484549 | 0.015059521 |
| Q6NYC8 | PPP1R18  | 14 | 2.675032906 | 7.064832660 |
| O43615 | TIMM44   | 9  | 2.666419124 | 0.015563331 |
| Q15645 | TRIP13   | 4  | 2.651944355 | 0.000059392 |
| Q13428 | TCOF1    | 30 | 2.646198773 | 0.001756493 |
| Q6NUK1 | SLC25A24 | 9  | 2.64000566  | 0.004205347 |
| O00629 | KPNA4    | 3  | 2.62179136  | 0.009022506 |
| Q9NR45 | NANS     | 3  | 2.618834991 | 0.00518211  |
| O15231 | ZNF185   | 18 | 2.617757449 | 0.0040696   |
| P08237 | PFKM     | 6  | 2.601930087 | 0.000806017 |
| P86791 | CCZ1     | 2  | 2.596870332 | 0.044992425 |
| Q14978 | NOLC1    | 17 | 2.595096195 | 0.000214781 |
| Q9Y4Y9 | LSM5     | 1  | 2.58665792  | 0.010223688 |
| Q92508 | PIEZO1   | 2  | 2.586383075 | 0.032473804 |
| O95373 | IPO7     | 8  | 2.578266307 | 0.006182445 |
| P04439 | HLA-A    | 2  | 2.576774966 | 0.000341951 |
| Q5JRA6 | MIA3     | 11 | 2.564721534 | 0.003768135 |
| Q16186 | ADRM1    | 7  | 2.558461254 | 0.000290825 |
| P84090 | ERH      | 4  | 2.554626985 | 0.004557449 |
| O76094 | SRP72    | 11 | 2.551884152 | 0.005282451 |
| P35232 | PHB      | 12 | 2.549259385 | 0.012607106 |

## SUPPORTING INFORMATION

|        |          |    |             |             |
|--------|----------|----|-------------|-------------|
| P49588 | AARS1    | 23 | 2.549061181 | 0.000147837 |
| O00399 | DCTN6    | 1  | 2.54501237  | 0.004726329 |
| Q9H9A6 | LRRC40   | 4  | 2.528424004 | 0.004432753 |
| Q14254 | FLOT2    | 7  | 2.527303995 | 0.000559936 |
| Q15642 | TRIP10   | 6  | 2.525576708 | 0.046365557 |
| O14530 | TXNDC9   | 3  | 2.523521293 | 0.034120852 |
| Q6IN85 | PPP4R3A  | 9  | 2.520075179 | 0.005128009 |
| Q99575 | POP1     | 8  | 2.517362897 | 0.000922472 |
| P07741 | APRT     | 5  | 2.516665733 | 0.021581103 |
| O95470 | SGPL1    | 5  | 2.510249684 | 0.003693409 |
| P30419 | NMT1     | 5  | 2.507717628 | 0.026686888 |
| Q9UNN5 | FAF1     | 6  | 2.506761447 | 0.009034306 |
| O00472 | ELL2     | 1  | 2.49365019  | 0.018239957 |
| Q13045 | FLII     | 15 | 2.492100557 | 0.003398022 |
| Q66K74 | MAP1S    | 7  | 2.491209408 | 0.018099248 |
| Q9GZZ1 | NAA50    | 6  | 2.490710188 | 0.031143334 |
| P20290 | BTF3     | 6  | 2.488992027 | 0.009107492 |
| Q16706 | MAN2A1   | 4  | 2.46706497  | 0.001156625 |
| O00425 | IGF2BP3  | 12 | 2.432097158 | 0.038636203 |
| P18621 | RPL17    | 5  | 2.431315203 | 0.027364059 |
| Q96D71 | REPS1    | 6  | 2.418433314 | 0.012048006 |
| Q9UJK9 | NUDT5    | 5  | 2.417056043 | 0.001994837 |
| Q9UHB6 | LIMA1    | 26 | 2.416996734 | 0.025215409 |
| P31943 | HNRNPH1  | 4  | 2.414068325 | 0.002393629 |
| Q8IY18 | SMC5     | 6  | 2.407764342 | 0.004724566 |
| O00571 | DDX3X    | 14 | 2.402448633 | 0.001312445 |
| Q5JTV8 | TOR1AIP1 | 8  | 2.40030681  | 0.028445893 |
| P52594 | AGFG1    | 5  | 2.397284808 | 0.000773148 |
| Q9NZQ3 | NCKIPSD  | 3  | 2.391161347 | 0.013909239 |
| P78358 | CTAG1A   | 2  | 2.385901799 | 0.010446516 |
| Q9P0J7 | KCMF1    | 2  | 2.384676414 | 0.002584149 |
| O60506 | SYNCRIP  | 10 | 2.379955206 | 0.001684493 |
| P49755 | TMED10   | 3  | 2.372514432 | 0.029571194 |
| P62879 | GNB2     | 2  | 2.36467867  | 0.01144188  |
| P55081 | MFAP1    | 3  | 2.359353575 | 0.002785137 |
| Q3LXA3 | TKFC     | 3  | 2.351126572 | 0.012553793 |
| Q9HCC0 | MCCC2    | 6  | 2.348782651 | 0.00946697  |
| Q8ND24 | RNF214   | 6  | 2.345389635 | 0.034757077 |
| P12270 | TPR      | 44 | 2.345135863 | 0.00065694  |
| Q05519 | SRSF11   | 3  | 2.340228309 | 0.023218187 |
| Q92945 | KHSRP    | 21 | 2.338725812 | 0.039049015 |
| P17844 | DDX5     | 11 | 2.329846355 | 0.000335192 |
| P56945 | BCAR1    | 4  | 2.308922844 | 0.014679676 |
| Q8IZL8 | PELP1    | 8  | 2.30506144  | 0.014051267 |
| P35611 | ADD1     | 11 | 2.302314022 | 0.010424711 |
| P62195 | PSMCS    | 10 | 2.302211138 | 0.001603302 |
| P33993 | MCM7     | 15 | 2.294774476 | 0.000386053 |
| P01889 | HLA-B    | 1  | 2.282181118 | 0.000508921 |
| Q14677 | CLINT1   | 8  | 2.277499459 | 0.036348804 |
| Q9UBC2 | EPS15L1  | 11 | 2.277042985 | 0.030800253 |
| Q9NVZ3 | NECAP2   | 4  | 2.275963663 | 0.005003128 |
| O60927 | PPP1R11  | 2  | 2.268254165 | 0.032203913 |
| P61964 | WDR5     | 5  | 2.266274741 | 0.001379837 |
| Q8TCJ2 | STT3B    | 6  | 2.26329082  | 0.003670055 |
| Q15599 | SLC9A3R2 | 5  | 2.258479368 | 0.03566484  |
| Q7L0Y3 | TRMT10C  | 5  | 2.257456802 | 0.000015858 |
| Q13107 | USP4     | 2  | 2.252090185 | 0.02120145  |
| Q8WXA9 | SREK1    | 3  | 2.244169679 | 0.003544745 |
| Q13838 | DDX39B   | 3  | 2.233809851 | 0.001903542 |
| P23786 | CPT2     | 7  | 2.230518661 | 0.022873287 |
| Q08379 | GOLGA2   | 5  | 2.225769117 | 0.011823814 |
| Q9UHD9 | UBQLN2   | 2  | 2.224406027 | 0.00282144  |
| Q9UI26 | IPO11    | 3  | 2.216866908 | 0.013999519 |

## SUPPORTING INFORMATION

|        |          |    |             |             |
|--------|----------|----|-------------|-------------|
| Q9HCN4 | GPN1     | 3  | 2.216253866 | 0.023703068 |
| Q13123 | IK       | 7  | 2.21238389  | 0.016742937 |
| Q8NFB3 | NUP43    | 3  | 2.204043972 | 0.025570266 |
| P61916 | NPC2     | 4  | 2.195887109 | 0.001182574 |
| P07737 | PFN1     | 9  | 2.19160925  | 0.005097988 |
| Q16891 | IMMT     | 24 | 2.177727101 | 0.002921041 |
| P33992 | MCM5     | 10 | 2.175465127 | 0.031736855 |
| Q9H0H5 | RACGAP1  | 8  | 2.163122214 | 0.030528966 |
| Q8NEB9 | PIK3C3   | 7  | 2.149071167 | 0.013563735 |
| O00429 | DNM1L    | 7  | 2.14790087  | 0.000509782 |
| Q9P2E9 | RRBP1    | 45 | 2.133244472 | 0.000075602 |
| P54886 | ALDH18A1 | 12 | 2.129937752 | 0.010718842 |
| P62333 | PSMC6    | 6  | 2.125759304 | 0.00047056  |
| P26641 | EEF1G    | 17 | 2.110429987 | 0.000838768 |
| P62277 | RPS13    | 7  | 2.107011395 | 0.002585098 |
| O94826 | TOMM70   | 12 | 2.100675074 | 0.041985278 |
| Q15434 | RBMS2    | 4  | 2.100434807 | 0.002380404 |
| P55884 | EIF3B    | 12 | 2.096428216 | 0.00101644  |
| Q9Y2W1 | THRAP3   | 14 | 2.086145162 | 0.012635246 |
| Q9H0S4 | DDX47    | 4  | 2.086078072 | 0.001244591 |
| P52926 | HMGA2    | 4  | 2.080686873 | 0.048401427 |
| O75746 | SLC25A12 | 3  | 2.066501987 | 0.030309843 |
| Q9Y399 | MRPS2    | 3  | 2.058259994 | 0.03211717  |
| Q99832 | CCT7     | 19 | 2.053641052 | 0.006534338 |
| Q9Y2U8 | LEMD3    | 5  | 2.036895189 | 0.009030198 |
| P50991 | CCT4     | 18 | 2.025807066 | 0.01358645  |
| P42566 | EPS15    | 6  | 2.022344448 | 0.00875958  |
| P41252 | IARS1    | 16 | 2.016395281 | 0.008949474 |
| P22234 | PAICS    | 11 | 2.016136784 | 0.001052458 |
| O95831 | AIFM1    | 10 | 2.014189227 | 0.046338011 |
| Q5C9Z4 | NOM1     | 7  | 2.010677268 | 0.028054039 |
| Q9Y314 | NOSIP    | 3  | 2.00438904  | 0.002663226 |

## SUPPORTING INFORMATION

**Table S4.** The significant difference proteins (fold change < 0.5, P value < 0.05) in Ir1-treated HT1080 cells compared with PBS treated cells by label-free Quantitative proteomics analysis. Statistical significance was assessed using Student's t-test.

| Protein | Gene Name | Unique Peptides | Ir-RSL/Ctrl | t test p value |
|---------|-----------|-----------------|-------------|----------------|
| P35249  | RFC4      | 7               | 0.495181882 | 0.01413393     |
| P20042  | EIF2S2    | 9               | 0.493958392 | 0.003358787    |
| Q06830  | PRDX1     | 11              | 0.493460294 | 0.031846812    |
| Q07157  | TJP1      | 14              | 0.492129097 | 0.034457051    |
| Q6IBS0  | TWF2      | 4               | 0.490352645 | 0.001785583    |
| Q8WUD4  | CCDC12    | 2               | 0.486669423 | 0.043524791    |
| P00338  | LDHA      | 12              | 0.486357683 | 0.008677597    |
| P62316  | SNRPD2    | 5               | 0.483533988 | 0.01620608     |
| P13861  | PRKAR2A   | 7               | 0.478616584 | 0.003543698    |
| Q9P0K7  | RAI14     | 17              | 0.474372124 | 0.00054637     |
| O95202  | LETM1     | 9               | 0.472631525 | 0.014237424    |
| Q13242  | SRSF9     | 5               | 0.470805397 | 0.016742836    |
| Q9P2B4  | CTTNBP2NL | 6               | 0.464161591 | 0.01086049     |
| Q04837  | SSBP1     | 4               | 0.463821105 | 0.046989151    |
| O15067  | PFAS      | 10              | 0.463597058 | 0.00155677     |
| P04150  | NR3C1     | 7               | 0.459868336 | 0.010625226    |
| P23528  | CFL1      | 9               | 0.456296929 | 0.011276392    |
| O75874  | IDH1      | 7               | 0.447058574 | 0.020746053    |
| P17655  | CAPN2     | 8               | 0.443566353 | 0.032785802    |
| P61604  | HSPE1     | 10              | 0.442834284 | 0.014946407    |
| P05198  | EIF2S1    | 13              | 0.437902874 | 0.000466785    |
| Q9UPN3  | MACF1     | 77              | 0.437273047 | 0.027928887    |
| P10599  | TXN       | 5               | 0.436236987 | 0.0305643      |
| Q12792  | TWF1      | 3               | 0.433882701 | 0.000704597    |
| Q9BY77  | POLDIP3   | 8               | 0.428820453 | 0.014062021    |
| P31942  | HNRNPH3   | 3               | 0.428302919 | 0.001477171    |
| Q9NTJ5  | SACM1L    | 8               | 0.421338156 | 0.004434408    |
| O00592  | PODXL     | 6               | 0.418898614 | 0.013061073    |
| P40429  | RPL13A    | 9               | 0.413185955 | 0.035397537    |
| P09874  | PARP1     | 21              | 0.40952248  | 0.031660041    |
| P12081  | HARS1     | 7               | 0.406737197 | 0.027483038    |
| Q9UJU6  | DBNL      | 8               | 0.406100303 | 0.001740486    |
| P08670  | VIM       | 41              | 0.403542032 | 0.009619732    |
| Q15075  | EEA1      | 39              | 0.398856692 | 0.022049042    |
| Q9BZQ8  | NIBAN1    | 11              | 0.398536598 | 0.033419948    |
| P07355  | ANXA2     | 24              | 0.397761682 | 0.031225851    |
| O43148  | RNMT      | 7               | 0.39631924  | 0.012031178    |
| O75116  | ROCK2     | 17              | 0.394335715 | 0.004569365    |
| O95573  | ACSL3     | 9               | 0.392944935 | 0.014996354    |
| Q8WUF5  | PPP1R13L  | 18              | 0.392010309 | 0.024276439    |
| Q15404  | RSU1      | 4               | 0.390556682 | 0.025973029    |
| P05455  | SSB       | 11              | 0.388822908 | 0.003730139    |
| Q9Y5S1  | TRPV2     | 10              | 0.386929017 | 0.031343506    |
| P09104  | ENO2      | 5               | 0.381070132 | 0.018614024    |
| Q9NZB2  | FAM120A   | 16              | 0.377144782 | 0.013351865    |
| Q07955  | SRSF1     | 12              | 0.376695542 | 0.011481507    |
| Q9NQC3  | RTN4      | 10              | 0.375015953 | 0.01154907     |
| Q9UHB9  | SRP68     | 11              | 0.37207289  | 0.005420118    |

## SUPPORTING INFORMATION

|        |          |    |             |             |
|--------|----------|----|-------------|-------------|
| Q9NZL9 | MAT2B    | 3  | 0.369679706 | 0.014998095 |
| Q9HDC9 | APMAP    | 10 | 0.368770572 | 0.049600588 |
| P35221 | CTNNA1   | 10 | 0.368680917 | 0.005535825 |
| P42224 | STAT1    | 7  | 0.367038944 | 0.041720374 |
| O95757 | HSPA4L   | 7  | 0.366735849 | 0.010410276 |
| O95785 | WIZ      | 8  | 0.363654275 | 0.002411034 |
| P62269 | RPS18    | 9  | 0.363260142 | 0.015190464 |
| P54707 | ATP12A   | 1  | 0.360356537 | 0.001390528 |
| O94760 | DDAH1    | 7  | 0.357942626 | 0.002233804 |
| P24928 | POLR2A   | 16 | 0.356450052 | 0.037878378 |
| P35998 | PSMC2    | 16 | 0.356439691 | 0.031396547 |
| Q8N155 | SLC39A11 | 2  | 0.356201738 | 0.003983184 |
| O75439 | PMPCB    | 8  | 0.35379273  | 0.000906658 |
| P54136 | RARS1    | 14 | 0.353588365 | 0.00357736  |
| P50995 | ANXA11   | 6  | 0.352621618 | 0.042504803 |
| P20337 | RAB3B    | 4  | 0.351835238 | 0.032784581 |
| O15355 | PPM1G    | 9  | 0.349279727 | 0.024184343 |
| P08240 | SRPRA    | 8  | 0.343356856 | 0.041876283 |
| P62249 | RPS16    | 6  | 0.342927979 | 0.010022002 |
| O75489 | NDUFS3   | 3  | 0.342747356 | 0.007015261 |
| Q99613 | EIF3C    | 13 | 0.342458594 | 0.005564978 |
| Q15070 | OXA1L    | 2  | 0.342256532 | 0.009843658 |
| O60763 | USO1     | 11 | 0.342250106 | 0.019131095 |
| P18077 | RPL35A   | 5  | 0.33794187  | 0.012928402 |
| Q86SQ0 | PHLDB2   | 8  | 0.332087905 | 0.049319198 |
| Q9NR56 | MBNL1    | 3  | 0.331741602 | 0.003321092 |
| Q9Y265 | RUVBL1   | 11 | 0.329583348 | 0.000886113 |
| Q96G03 | PGM2     | 15 | 0.3271806   | 0.018320219 |
| P09960 | LTA4H    | 14 | 0.326583185 | 0.000725319 |
| P31040 | SDHA     | 8  | 0.324519949 | 0.022413026 |
| Q15056 | EIF4H    | 9  | 0.323660574 | 0.025459498 |
| P46776 | RPL27A   | 3  | 0.322185333 | 0.004980515 |
| P51659 | HSD17B4  | 7  | 0.317034508 | 0.003412429 |
| P62877 | RBX1     | 3  | 0.316372139 | 0.024721944 |
| O94925 | GLS      | 8  | 0.315209254 | 0.004829547 |
| Q14103 | HNRNPD   | 10 | 0.314680649 | 0.002804104 |
| P09972 | ALDOC    | 12 | 0.310604191 | 0.019590882 |
| P07311 | ACYP1    | 3  | 0.309299616 | 0.022596953 |
| P63272 | SUPT4H1  | 2  | 0.309197132 | 0.008517345 |
| P27708 | CAD      | 23 | 0.305078537 | 0.002249869 |
| P62424 | RPL7A    | 14 | 0.302698588 | 0.000395079 |
| Q9Y310 | RTCB     | 11 | 0.301171611 | 0.004049246 |
| Q9UQ35 | SRRM2    | 23 | 0.299875258 | 0.016201674 |
| P23229 | ITGA6    | 17 | 0.298862498 | 0.002761548 |
| P17980 | PSMC3    | 10 | 0.294944497 | 0.044139368 |
| P07339 | CTSD     | 6  | 0.293932848 | 0.002242392 |
| P16989 | YBX3     | 8  | 0.293413307 | 0.032662503 |
| Q9UNH7 | SNX6     | 9  | 0.290400124 | 0.003307383 |
| P52566 | ARHGDI8  | 6  | 0.289322777 | 0.019548445 |
| Q9BXJ9 | NAA15    | 12 | 0.288365632 | 0.003466522 |

## SUPPORTING INFORMATION

|        |         |    |             |             |
|--------|---------|----|-------------|-------------|
| P49790 | NUP153  | 19 | 0.279420941 | 0.006817937 |
| Q9BZZ5 | API5    | 8  | 0.277075851 | 0.004344254 |
| Q8TCS8 | PNPT1   | 12 | 0.27372702  | 0.019001709 |
| P28066 | PSMA5   | 3  | 0.273260857 | 0.005971481 |
| Q16527 | CSRP2   | 2  | 0.269092566 | 0.01870586  |
| P53611 | RABGGTB | 3  | 0.268251032 | 0.04490728  |
| Q9P265 | DIP2B   | 14 | 0.268001013 | 0.014936949 |
| P23526 | AHCY    | 10 | 0.264690583 | 0.000509907 |
| P13489 | RNH1    | 11 | 0.260587888 | 0.006753044 |
| Q9UHX1 | PUF60   | 9  | 0.258128843 | 0.043092124 |
| P30050 | RPL12   | 8  | 0.256555422 | 0.001272411 |
| Q2NL82 | TSR1    | 9  | 0.255237723 | 0.003158844 |
| P07195 | LDHB    | 12 | 0.25214815  | 0.008013915 |
| P35250 | RFC2    | 7  | 0.248029842 | 0.003120976 |
| Q13177 | PAK2    | 8  | 0.245626618 | 0.00489267  |
| P16435 | POR     | 1  | 0.242950566 | 0.018515326 |
| P62263 | RPS14   | 7  | 0.24196571  | 0.00064839  |
| Q9H832 | UBE2Z   | 2  | 0.239414653 | 0.028550121 |
| Q9BZE1 | MRPL37  | 4  | 0.236943058 | 0.006264515 |
| Q16222 | UAP1    | 10 | 0.235234337 | 0.000344113 |
| P52209 | PGD     | 8  | 0.235032934 | 0.003867398 |
| Q32P28 | P3H1    | 7  | 0.229967492 | 0.002001048 |
| P14618 | PKM     | 34 | 0.22714781  | 0.008586504 |
| Q13765 | NACA    | 3  | 0.22612885  | 0.019618674 |
| Q14974 | KPNB1   | 12 | 0.225019299 | 0.005402087 |
| O43852 | CALU    | 5  | 0.222185676 | 0.036710053 |
| P42766 | RPL35   | 3  | 0.221105983 | 0.006270245 |
| P62280 | RPS11   | 9  | 0.217975112 | 0.000127799 |
| P35606 | COPB2   | 21 | 0.208131538 | 0.001445029 |
| P17301 | ITGA2   | 15 | 0.207345357 | 0.006722017 |
| P18754 | RCC1    | 9  | 0.206442874 | 0.015346137 |
| Q92841 | DDX17   | 9  | 0.205712627 | 0.010237152 |
| P84077 | ARF1    | 2  | 0.202592688 | 0.000332031 |
| P78417 | GSTO1   | 7  | 0.2025213   | 0.006898259 |
| P60900 | PSMA6   | 8  | 0.197167372 | 0.009637365 |
| Q9Y285 | FARSA   | 7  | 0.196185865 | 0.00175319  |
| P56537 | EIF6    | 5  | 0.195402738 | 0.005563324 |
| P08865 | RPSA    | 8  | 0.195337504 | 0.006934493 |
| Q6PJG2 | MIDEAS  | 4  | 0.192151872 | 0.014457905 |
| P50395 | GDI2    | 11 | 0.188236583 | 0.005300852 |
| P04083 | ANXA1   | 15 | 0.186411111 | 0.016095617 |
| P11766 | ADH5    | 6  | 0.181635449 | 0.024014118 |
| Q00653 | NFKB2   | 6  | 0.181293766 | 0.004270469 |
| P13073 | COX4I1  | 4  | 0.179728163 | 0.000999726 |
| Q15942 | ZYX     | 14 | 0.179650826 | 0.001877821 |
| Q93034 | CUL5    | 8  | 0.179614693 | 0.011658142 |
| P62306 | SNRPF   | 2  | 0.179391513 | 0.001550923 |
| P41091 | EIF2S3  | 11 | 0.175305995 | 0.005579744 |
| P17174 | GOT1    | 6  | 0.174358251 | 0.039031384 |
| Q02878 | RPL6    | 11 | 0.171795205 | 0.006804704 |

## SUPPORTING INFORMATION

|        |          |    |             |             |
|--------|----------|----|-------------|-------------|
| P22392 | NME2     | 4  | 0.169438817 | 0.007098654 |
| Q13347 | EIF3I    | 8  | 0.166523811 | 0.014034541 |
| P39687 | ANP32A   | 4  | 0.165022743 | 0.018024196 |
| P62913 | RPL11    | 6  | 0.162939967 | 0.000399692 |
| P61313 | RPL15    | 3  | 0.162902963 | 0.009749921 |
| Q08211 | DHX9     | 20 | 0.162675465 | 0.001615362 |
| Q9H4A3 | WNK1     | 11 | 0.162414595 | 0.04319889  |
| P62753 | RPS6     | 9  | 0.161438588 | 0.002294783 |
| P29590 | PML      | 11 | 0.155671061 | 0.014840471 |
| Q12906 | ILF3     | 15 | 0.144574199 | 0.001319819 |
| P55060 | CSE1L    | 18 | 0.142626704 | 0.003922667 |
| P12814 | ACTN1    | 16 | 0.138219773 | 0.001409309 |
| Q96TA1 | NIBAN2   | 7  | 0.137223802 | 0.006762723 |
| Q13509 | TUBB3    | 0  | 0.131287109 | 0.002839179 |
| Q9HAV4 | XPO5     | 12 | 0.12649864  | 0.006152721 |
| Q93052 | LPP      | 13 | 0.125415466 | 0.000014361 |
| P37802 | TAGLN2   | 9  | 0.125280322 | 0.000782839 |
| P22061 | PCMT1    | 6  | 0.124909199 | 0.018708607 |
| O43143 | DHX15    | 12 | 0.124087905 | 0.000043767 |
| P61019 | RAB2A    | 4  | 0.12331596  | 0.039408111 |
| Q6NUQ4 | TMEM214  | 6  | 0.122068966 | 0.000094330 |
| P00505 | GOT2     | 10 | 0.120781859 | 0.000393318 |
| P43034 | PAFAH1B1 | 8  | 0.114961324 | 0.001700737 |
| P22314 | UBA1     | 25 | 0.114546774 | 0.000105663 |
| P61158 | ACTR3    | 8  | 0.110252042 | 0.000823616 |
| Q15287 | RNPS1    | 2  | 0.109066821 | 0.000391204 |
| O60216 | RAD21    | 5  | 0.104223715 | 0.002636733 |
| Q07020 | RPL18    | 5  | 0.104010893 | 0.011928423 |
| Q71DI3 | H3C15    | 2  | 0.098202778 | 0.008935176 |
| P18124 | RPL7     | 8  | 0.093556154 | 0.000541303 |
| O60749 | SNX2     | 12 | 0.093277336 | 0.00018863  |
| Q9Y3F4 | STRAP    | 11 | 0.092659023 | 0.000561724 |
| P08243 | ASNS     | 5  | 0.091726739 | 0.004509179 |
| P60842 | EIF4A1   | 5  | 0.091142228 | 0.002580845 |
| P29692 | EEF1D    | 9  | 0.086387004 | 0.000046127 |
| P11279 | LAMP1    | 3  | 0.078276397 | 0.024449158 |
| Q96PK6 | RBM14    | 16 | 0.069617064 | 0.000073202 |
| Q9Y394 | DHRS7    | 1  | 0.064733533 | 0.024352773 |
| P39656 | DDOST    | 3  | 0.063623859 | 0.007301312 |
| P62906 | RPL10A   | 3  | 0.06307188  | 0.000002503 |
| Q14195 | DPYSL3   | 7  | 0.06212347  | 0.000023339 |
| P55854 | SUMO3    | 1  | 0.056192082 | 0.000128172 |
| P62917 | RPL8     | 10 | 0.049631294 | 0.002221598 |
| P34897 | SHMT2    | 9  | 0.044578592 | 0.000038168 |
| P54819 | AK2      | 6  | 0.044085069 | 0.000011212 |
| P51149 | RAB7A    | 9  | 0.042035662 | 0.000356734 |
| P61353 | RPL27    | 3  | 0.040354049 | 0.006067716 |
| P29317 | EPHA2    | 13 | 0.037668921 | 0.000145984 |
| P62854 | RPS26    | 2  | 0.035208754 | 0.00016819  |
| P42166 | TMPO     | 12 | 0.01811705  | 0.000994191 |
| Q9BY44 | EIF2A    | 16 | 0.012045171 | 0.000001075 |



# SUPPORTING INFORMATION

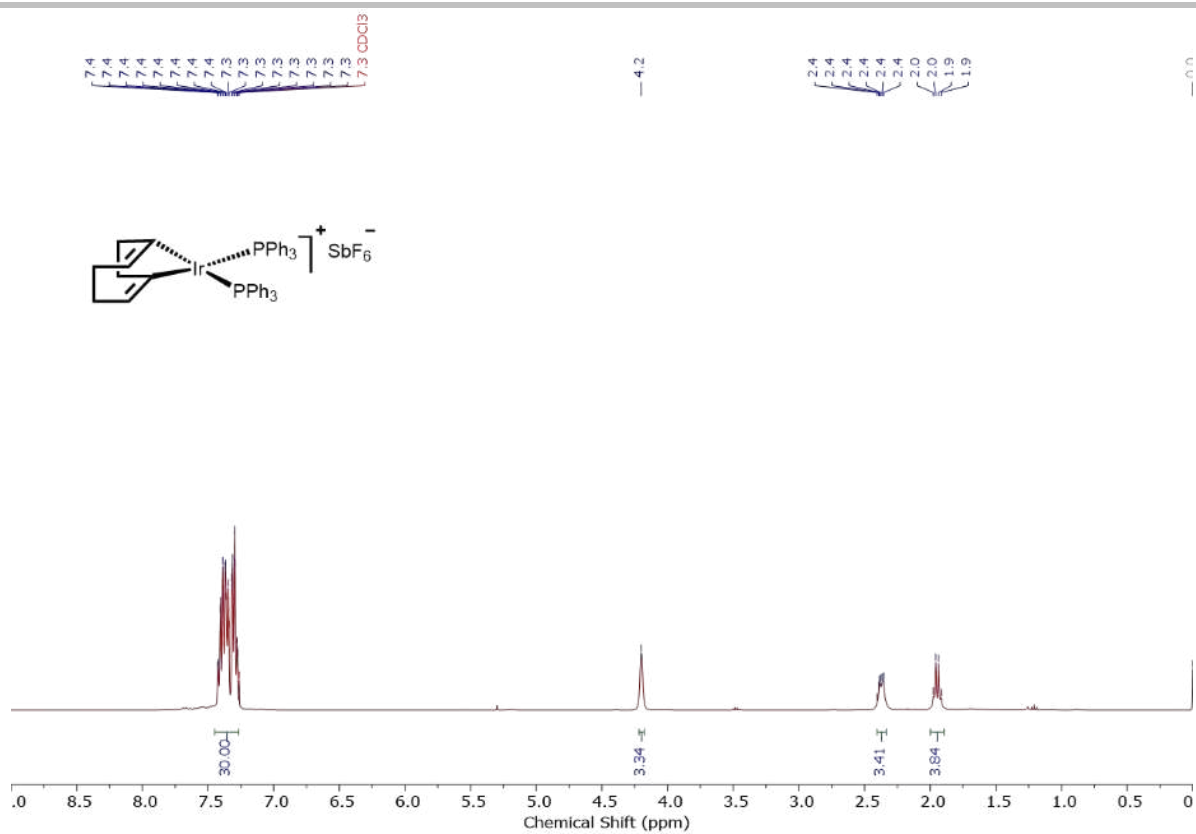

**Figure S20.** <sup>1</sup>H NMR spectrum (400 MHz, CDCl<sub>3</sub>) of [IrCOD(PPh<sub>3</sub>)<sub>2</sub>]SbF<sub>6</sub>.

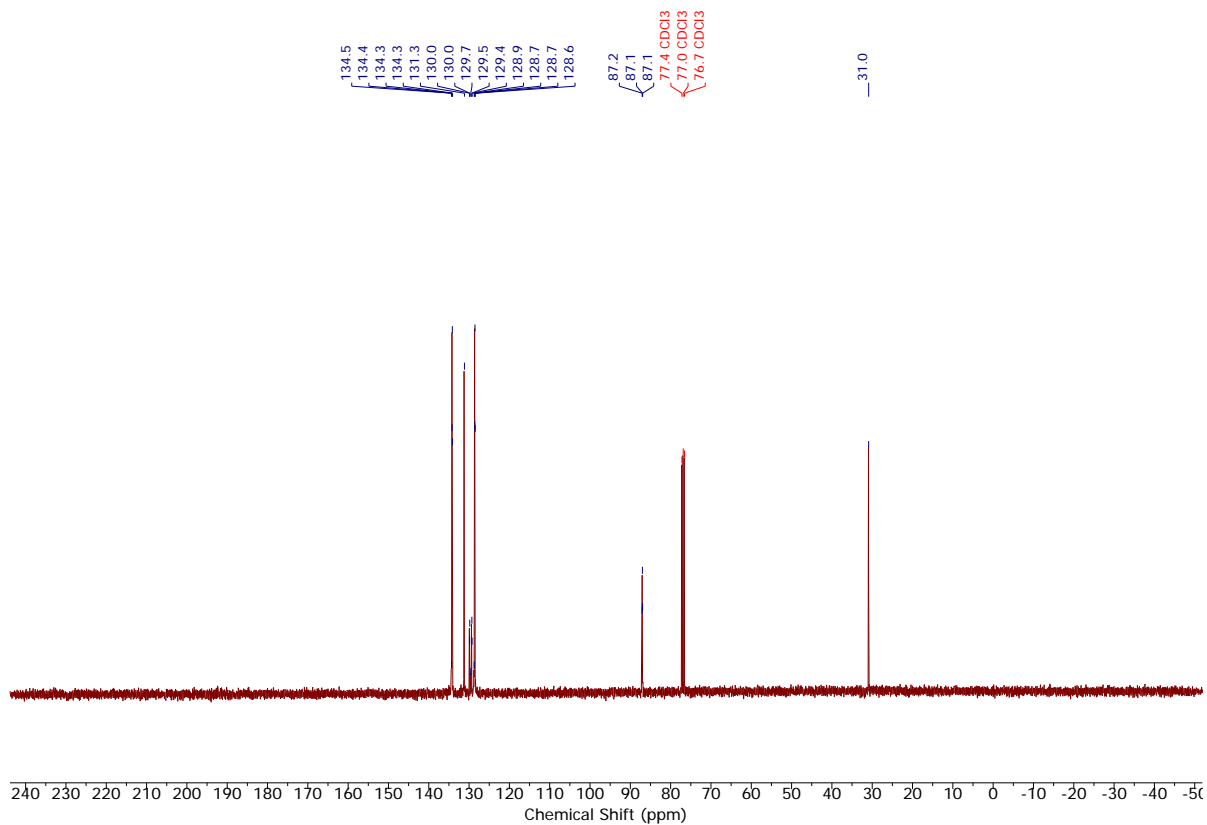

**Figure S21.** <sup>13</sup>C NMR spectrum (101 MHz, CDCl<sub>3</sub>) of [IrCOD(PPh<sub>3</sub>)<sub>2</sub>]SbF<sub>6</sub>.

# SUPPORTING INFORMATION

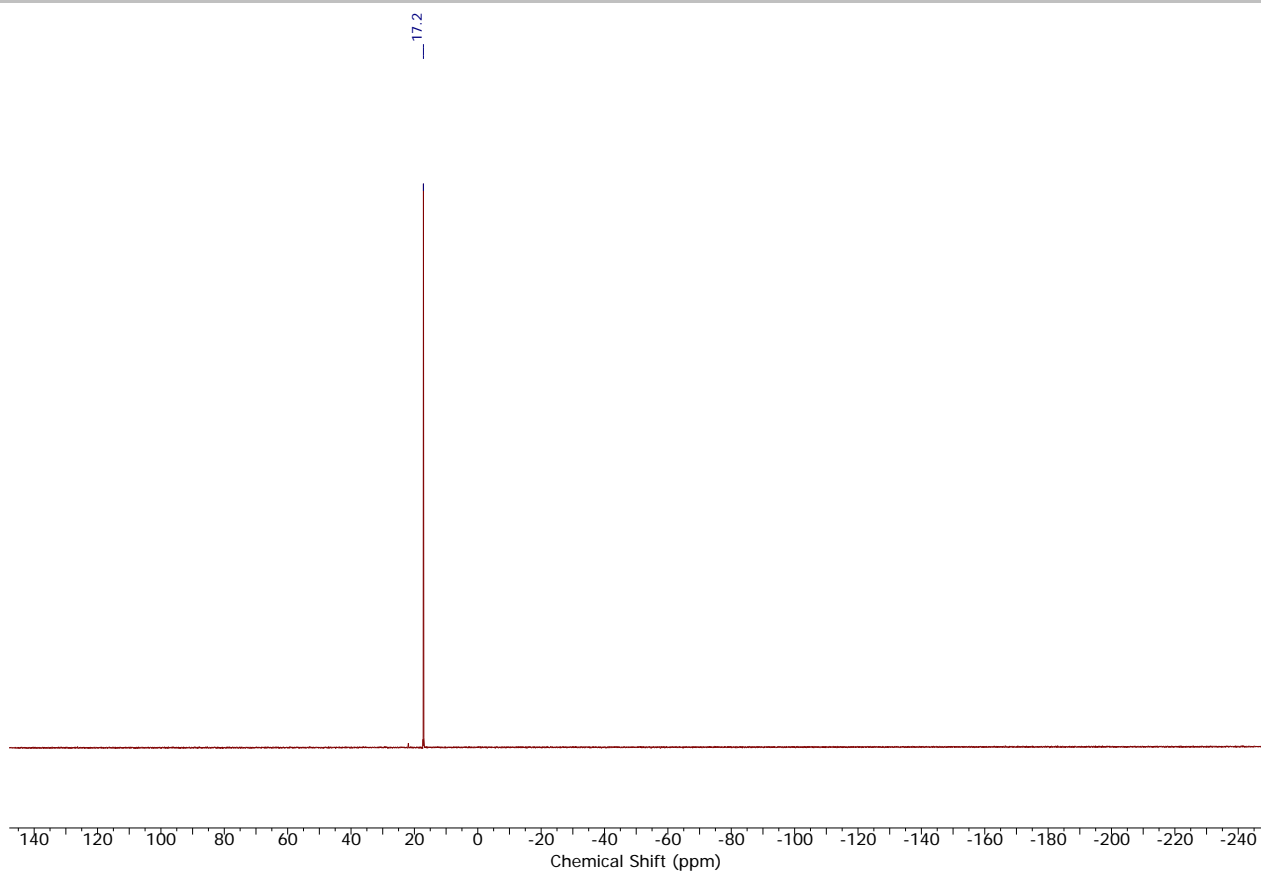

**Figure S22.**  $^{31}\text{P}$  NMR spectrum (162 MHz,  $\text{CDCl}_3$ ) of  $[\text{IrCOD}(\text{PPh}_3)_2]\text{SbF}_6$ .

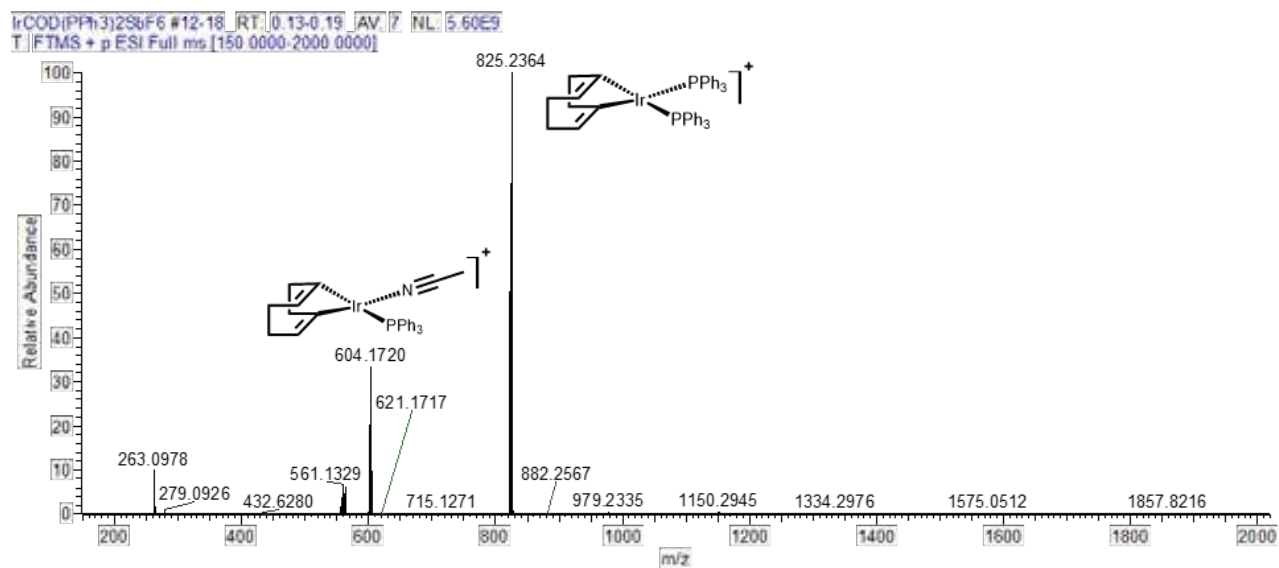

**Figure S23.** HRMS (solvent: MeCN) spectrum of  $[\text{IrCOD}(\text{PPh}_3)_2]\text{SbF}_6$ .

# SUPPORTING INFORMATION

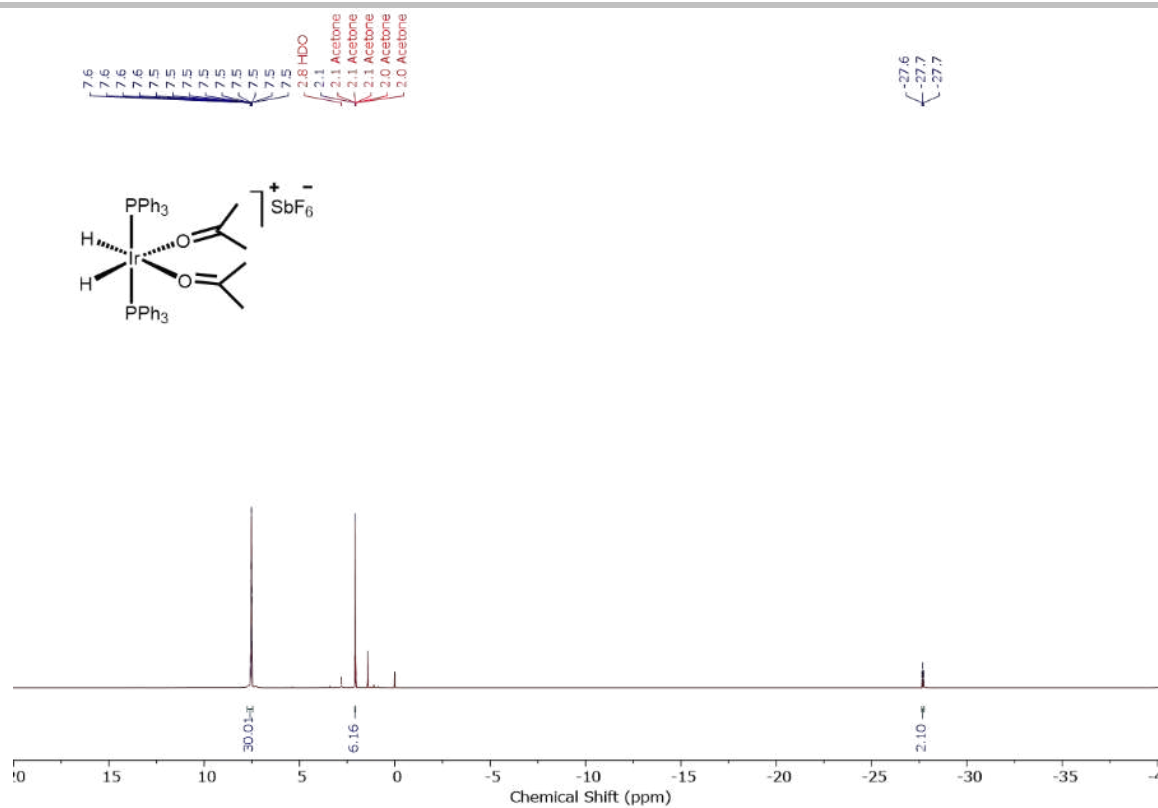

**Figure S24.**  $^1\text{H}$  NMR spectrum (400 MHz, Acetone- $d_6$ ) of  $[\text{IrH}_2(\text{PPh}_3)_2(\text{C}_3\text{H}_6\text{O})_2]\text{SbF}_6$ .

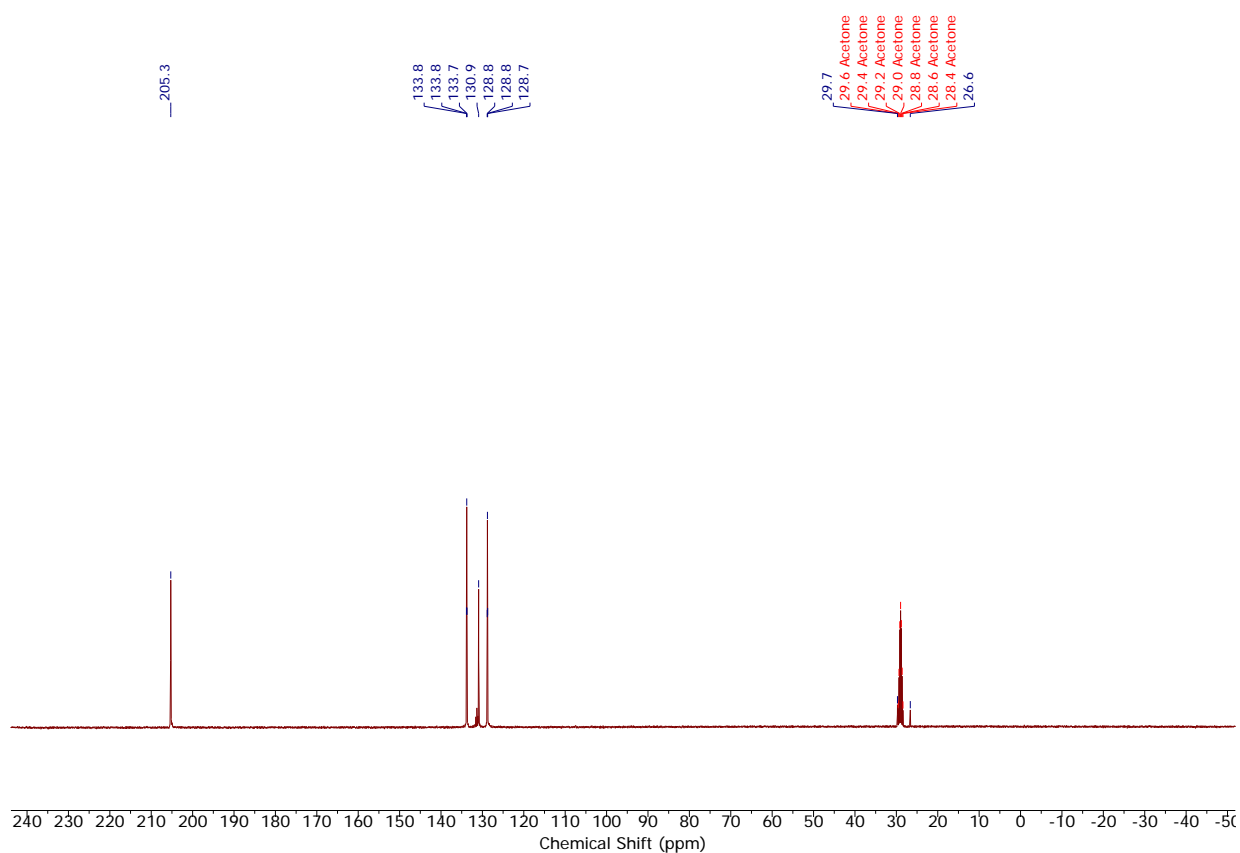

**Figure S25.**  $^{13}\text{C}$  NMR spectrum (101 MHz, Acetone- $d_6$ ) of  $[\text{IrH}_2(\text{PPh}_3)_2(\text{C}_3\text{H}_6\text{O})_2]\text{SbF}_6$ .

# SUPPORTING INFORMATION

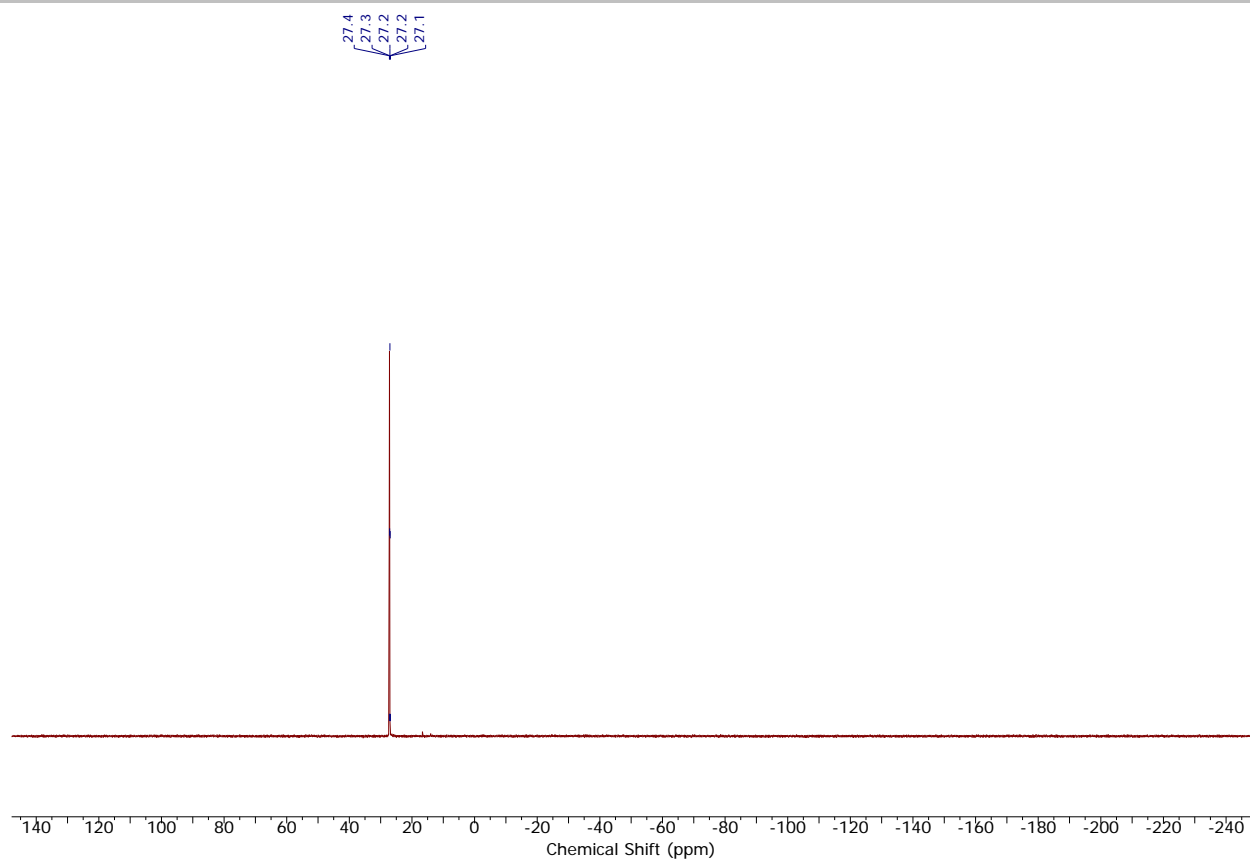

**Figure S26.**  $^{31}\text{P}$  NMR spectrum (162 MHz, Acetone- $d_6$ ) of  $[\text{IrH}_2(\text{PPh}_3)_2(\text{C}_3\text{H}_6\text{O})_2]\text{SbF}_6$ .

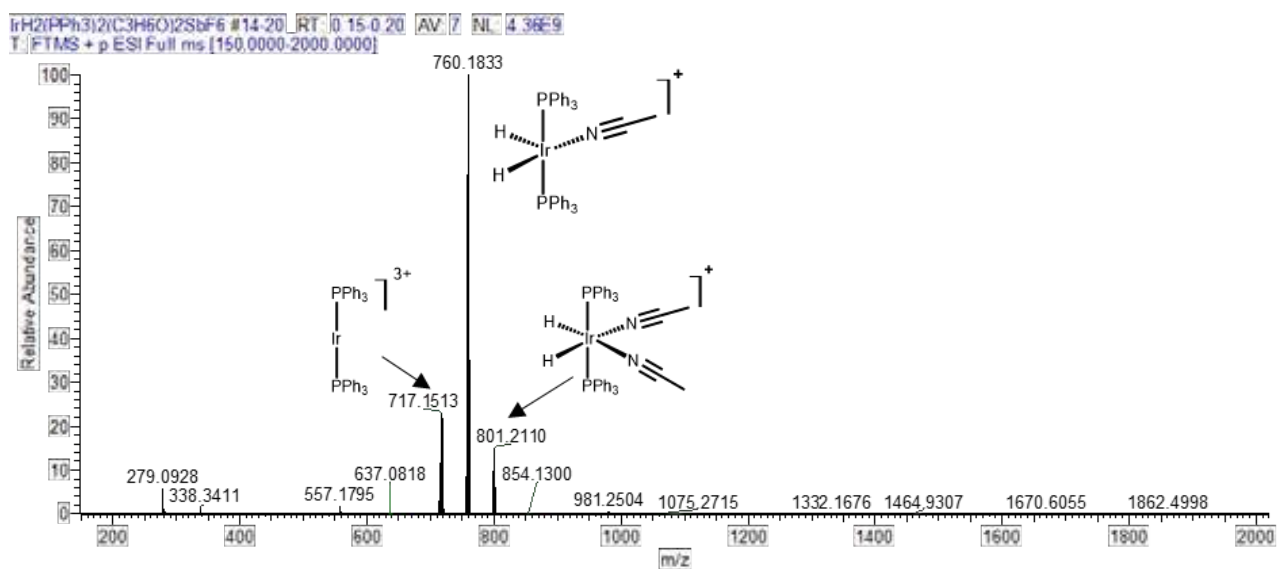

**Figure S27.** HRMS (solvent: MeCN) spectrum of  $[\text{IrH}_2(\text{PPh}_3)_2(\text{C}_3\text{H}_6\text{O})_2]\text{SbF}_6$ .

# SUPPORTING INFORMATION

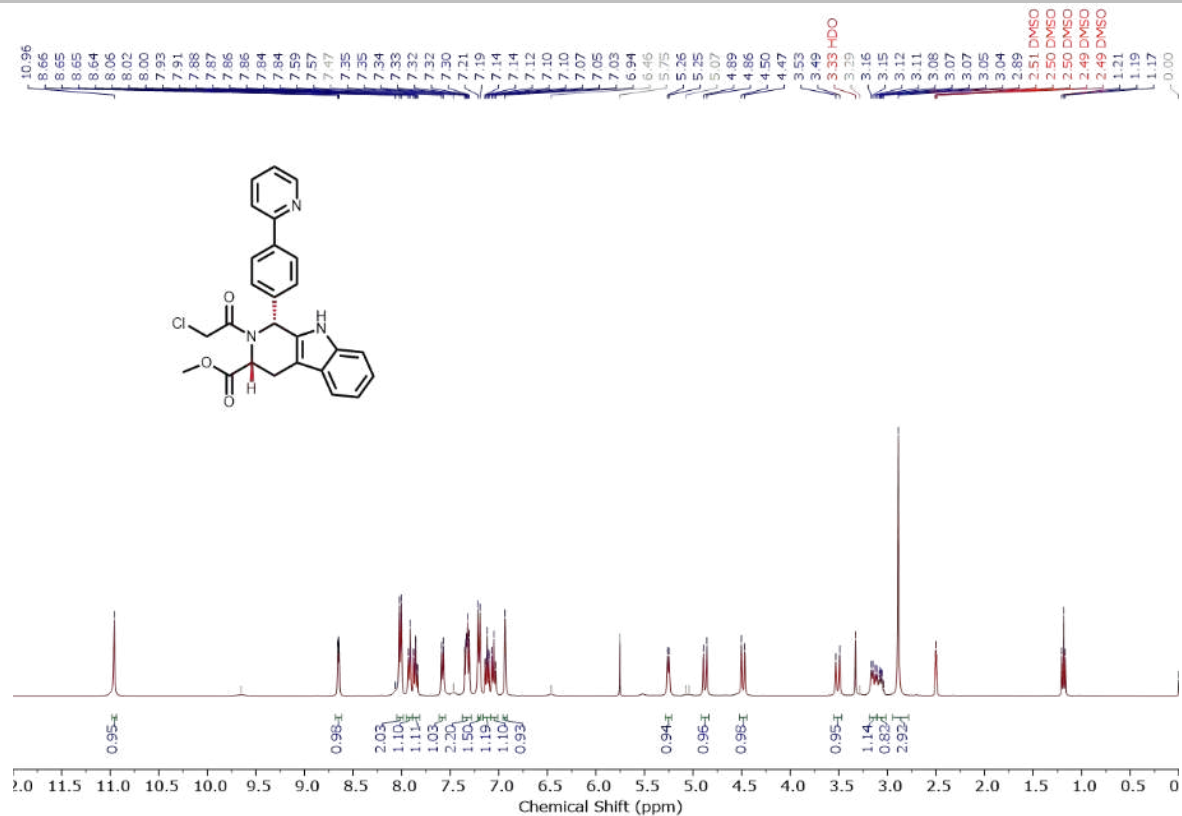

Figure S28. <sup>1</sup>H NMR spectrum (400 MHz, DMSO-d<sub>6</sub>) of L2.

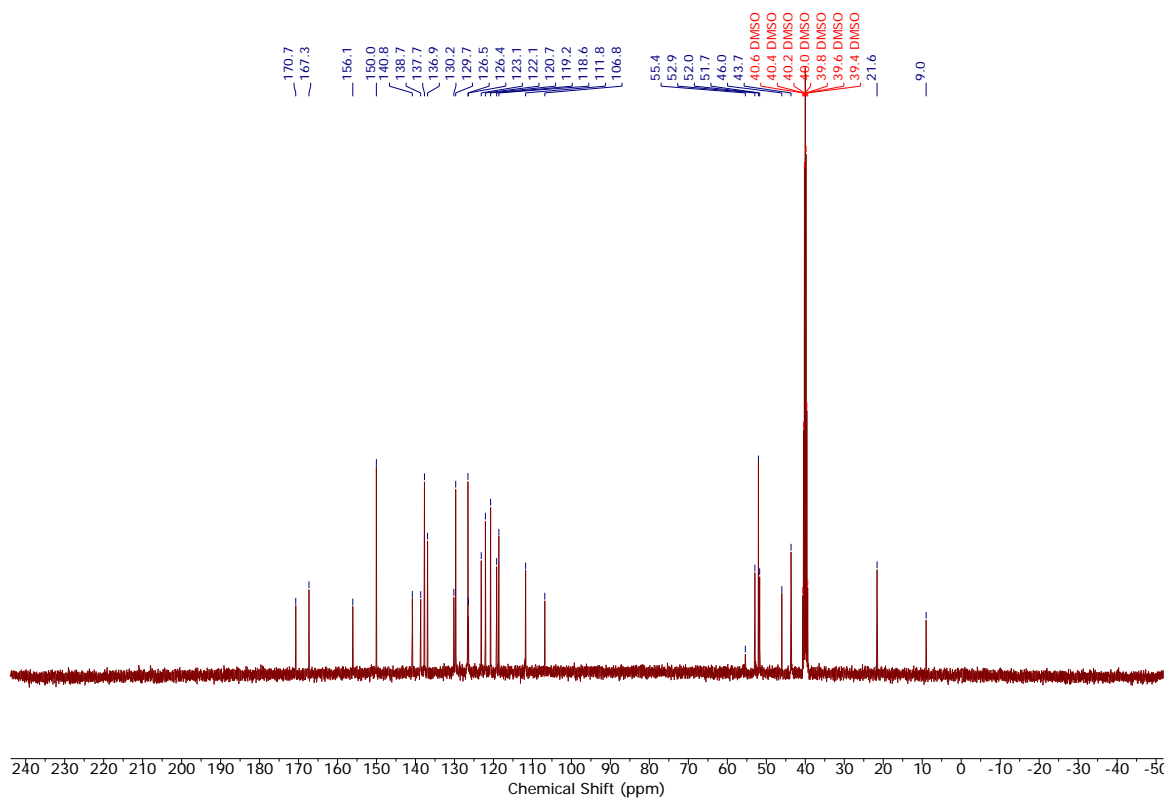

Figure S29. <sup>13</sup>C NMR spectrum (101 MHz, DMSO-d<sub>6</sub>) of L2.

# SUPPORTING INFORMATION

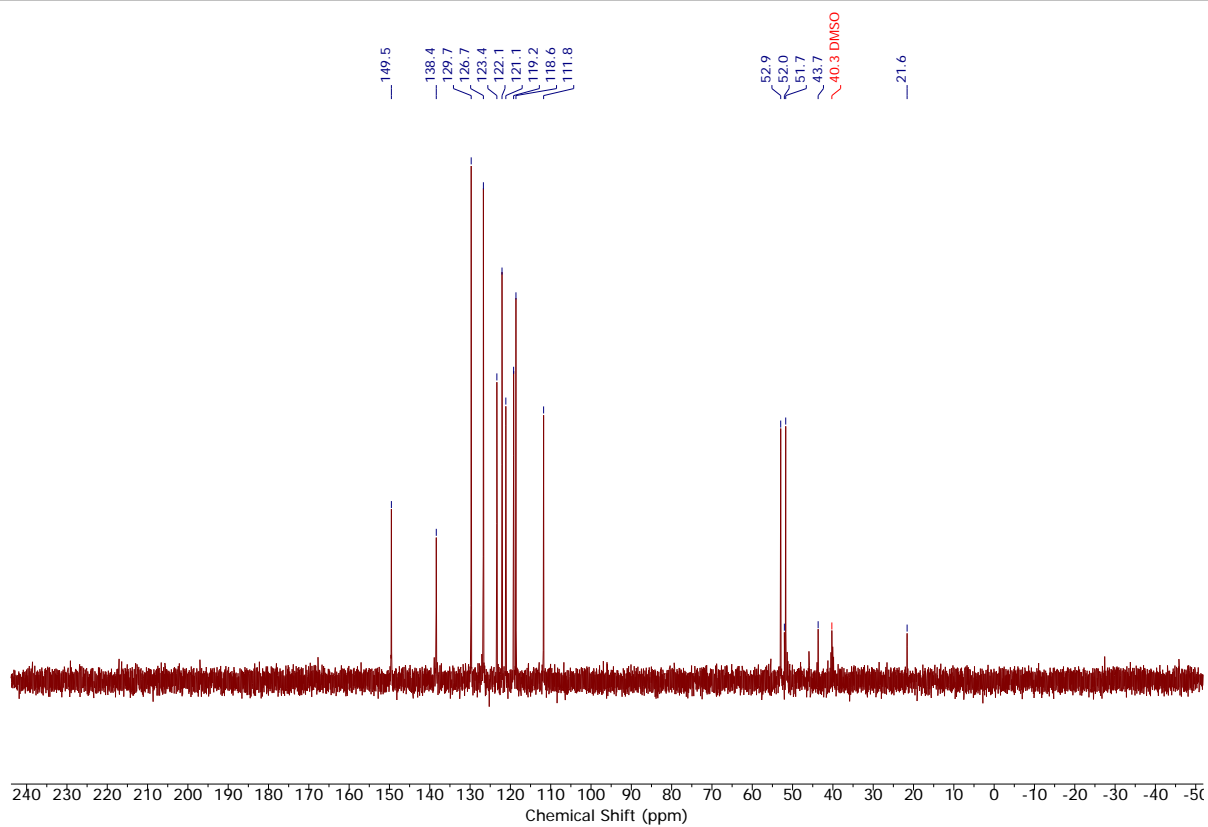

Figure S30. DEPT-90 spectrum (101 MHz, DMSO-d<sub>6</sub>) of L2.

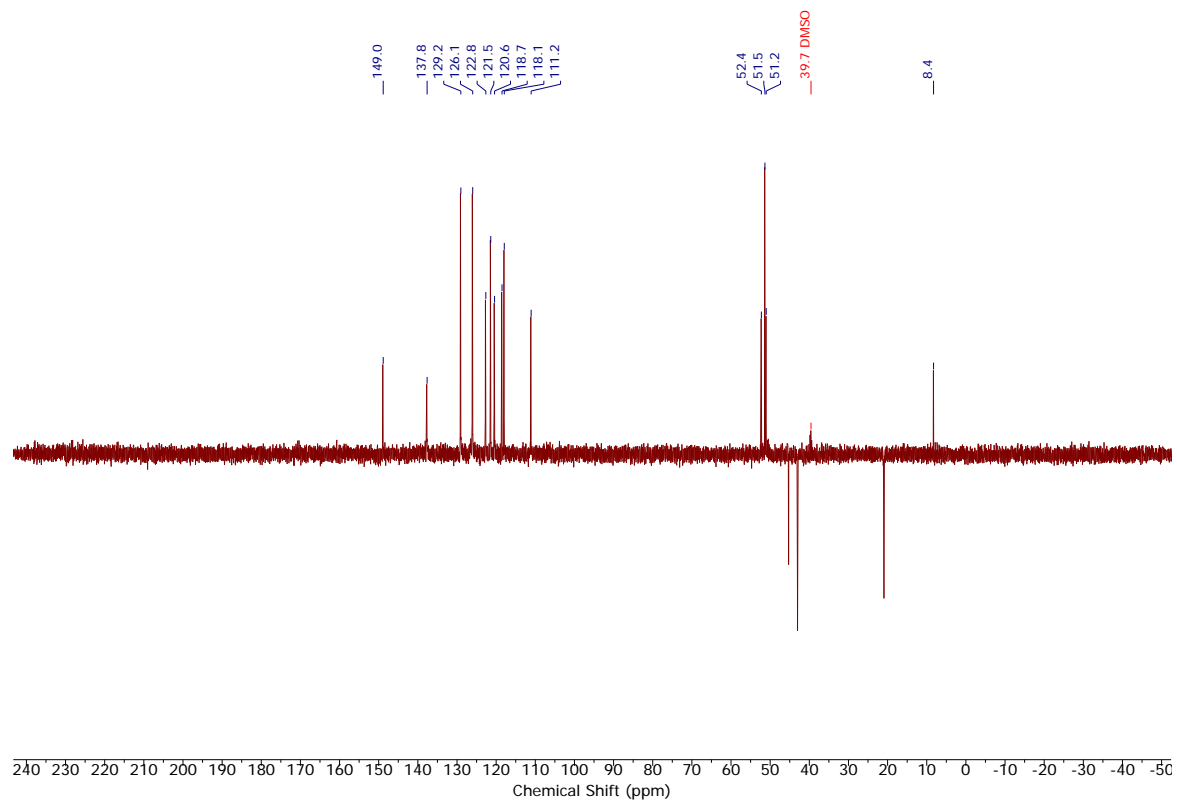

Figure S31. DEPT-135 spectrum (101 MHz, DMSO-d<sub>6</sub>) of L2.

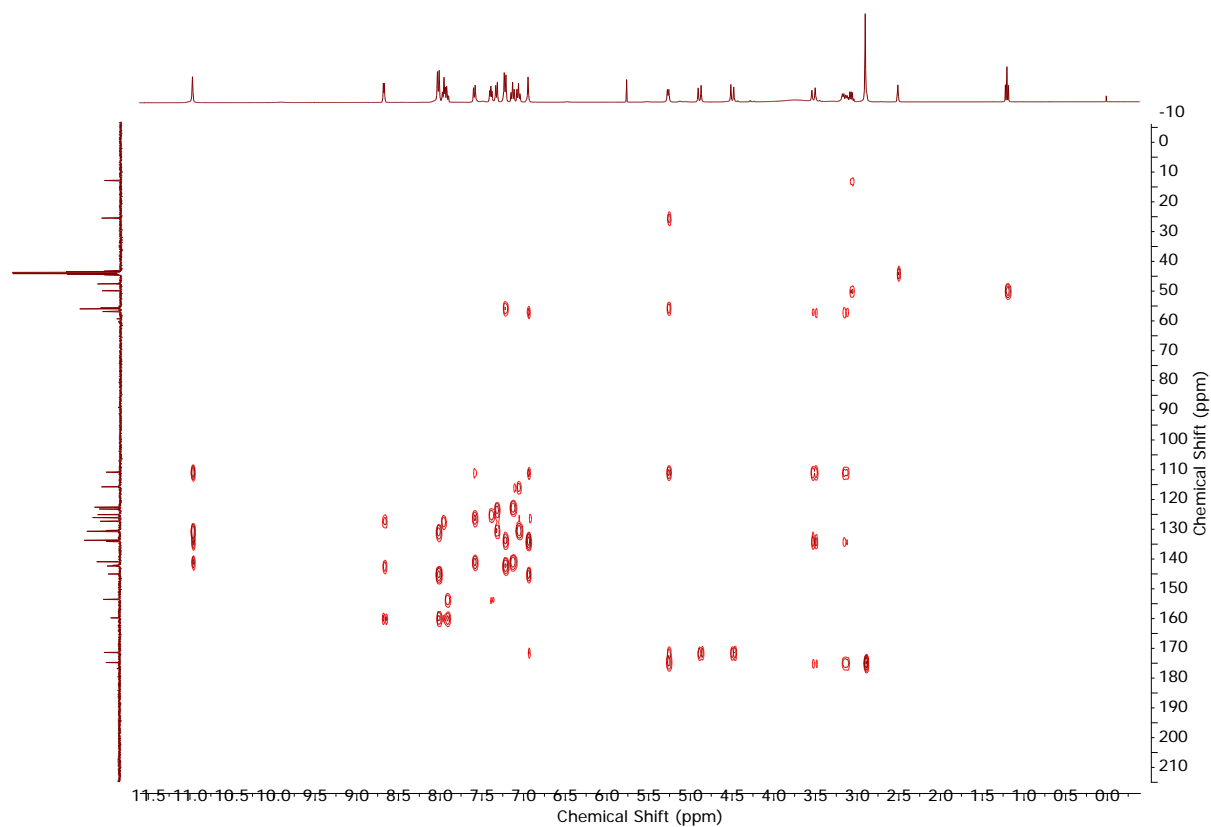

Figure S32. HMBC spectrum (400 MHz, DMSO- $d_6$ ) of L2.

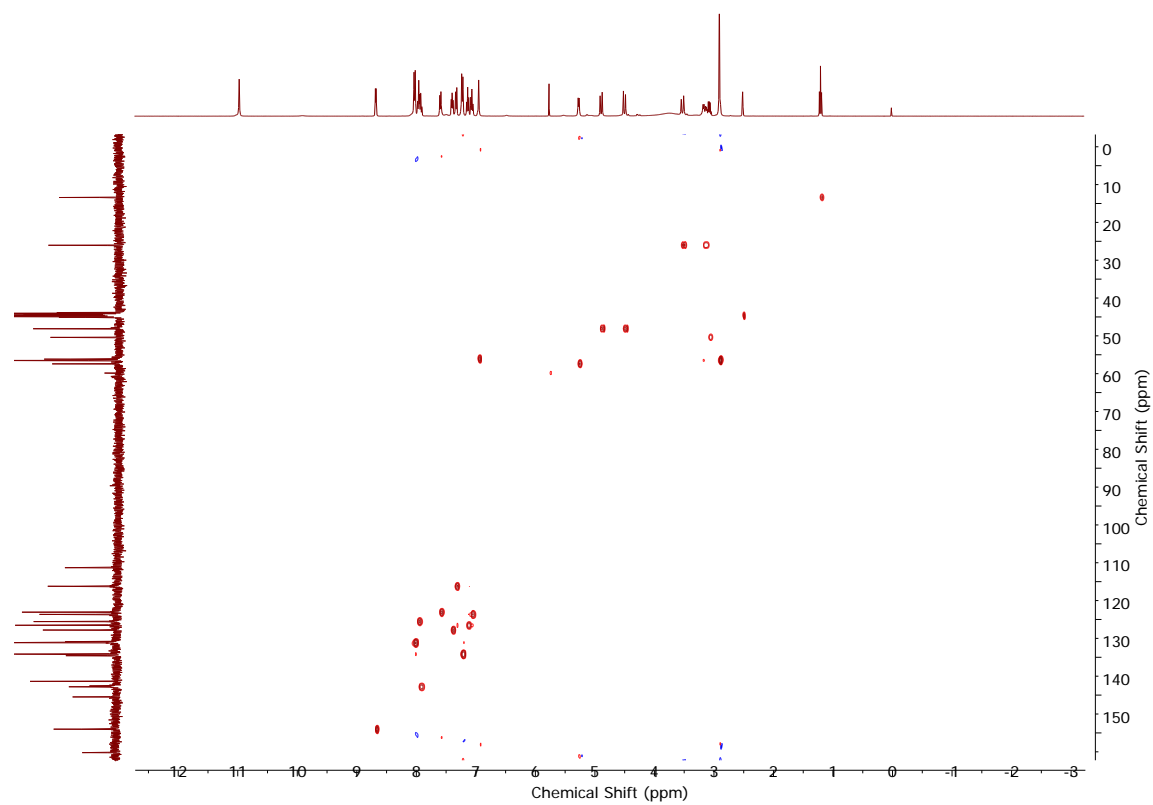

Figure S33. HSQC spectrum (400 MHz, DMSO- $d_6$ ) of L2.

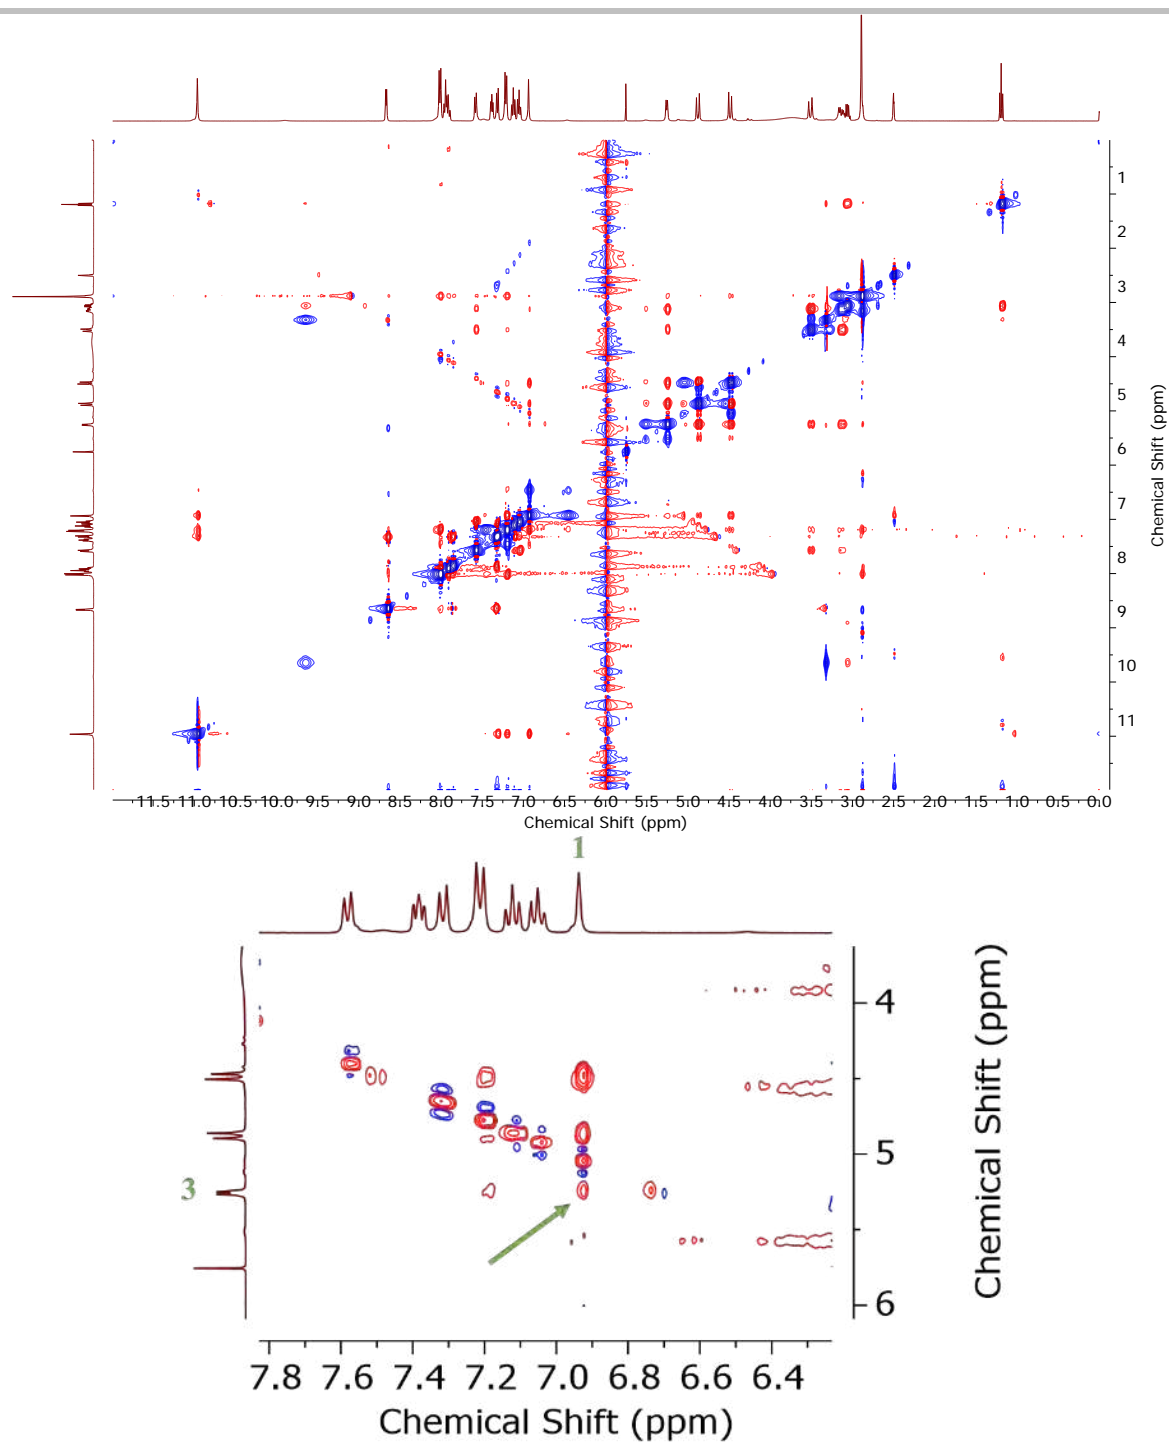

Figure S34. NOESY spectrum (400 MHz,  $\text{DMSO-d}_6$ ) of L2.



# SUPPORTING INFORMATION

Ligand (1R, 3R) #113 | RT: 1.09 | AV: 1 | NL: 5.11E7  
 T: FTMS + p ESI Full ms [100.0000-500.0000]

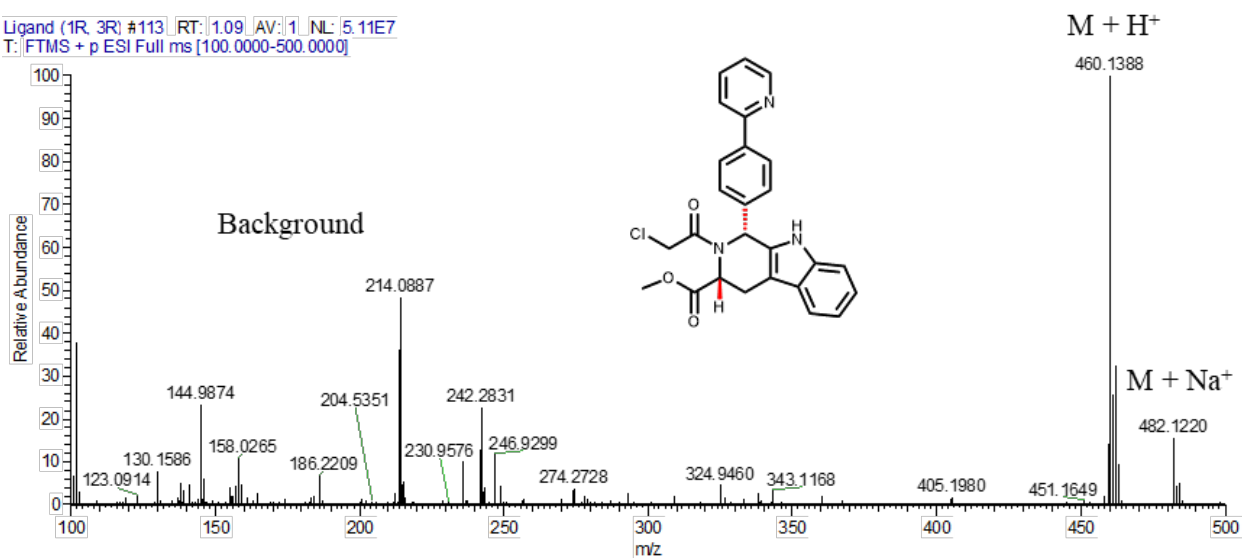

Figure S35. HRMS (solvent: MeCN) spectrum of L2.

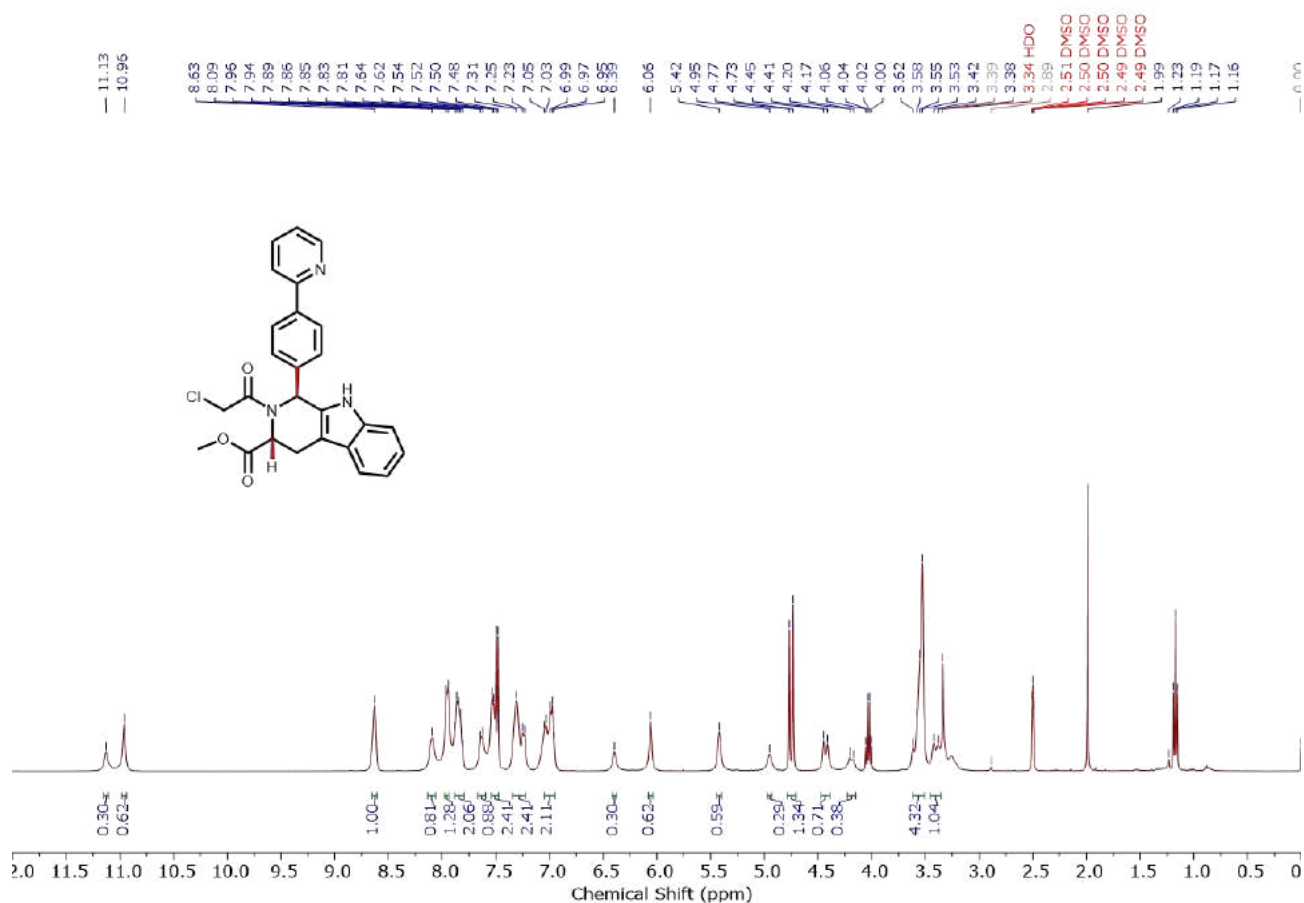

Figure S36. <sup>1</sup>H NMR spectrum (400 MHz, DMSO-d<sub>6</sub>) of L1.

# SUPPORTING INFORMATION

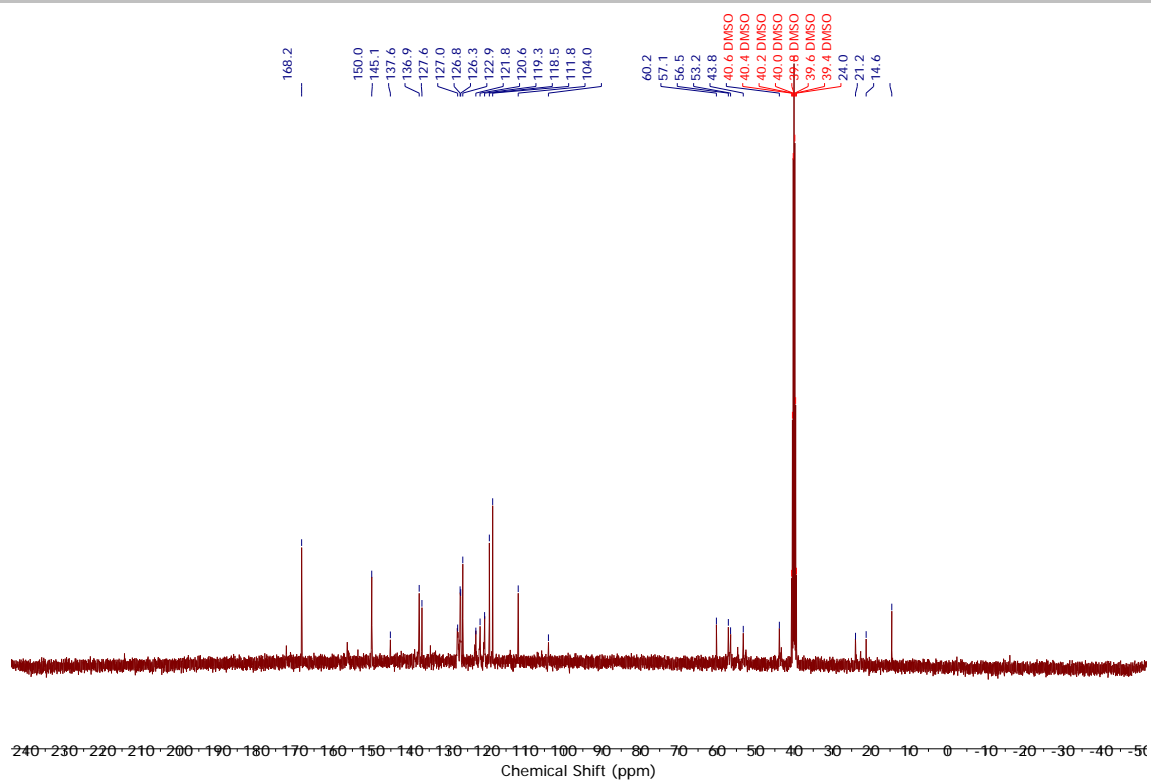

Figure S37.  $^{13}\text{C}$  NMR spectrum (101 MHz,  $\text{DMSO-d}_6$ ) of L1.

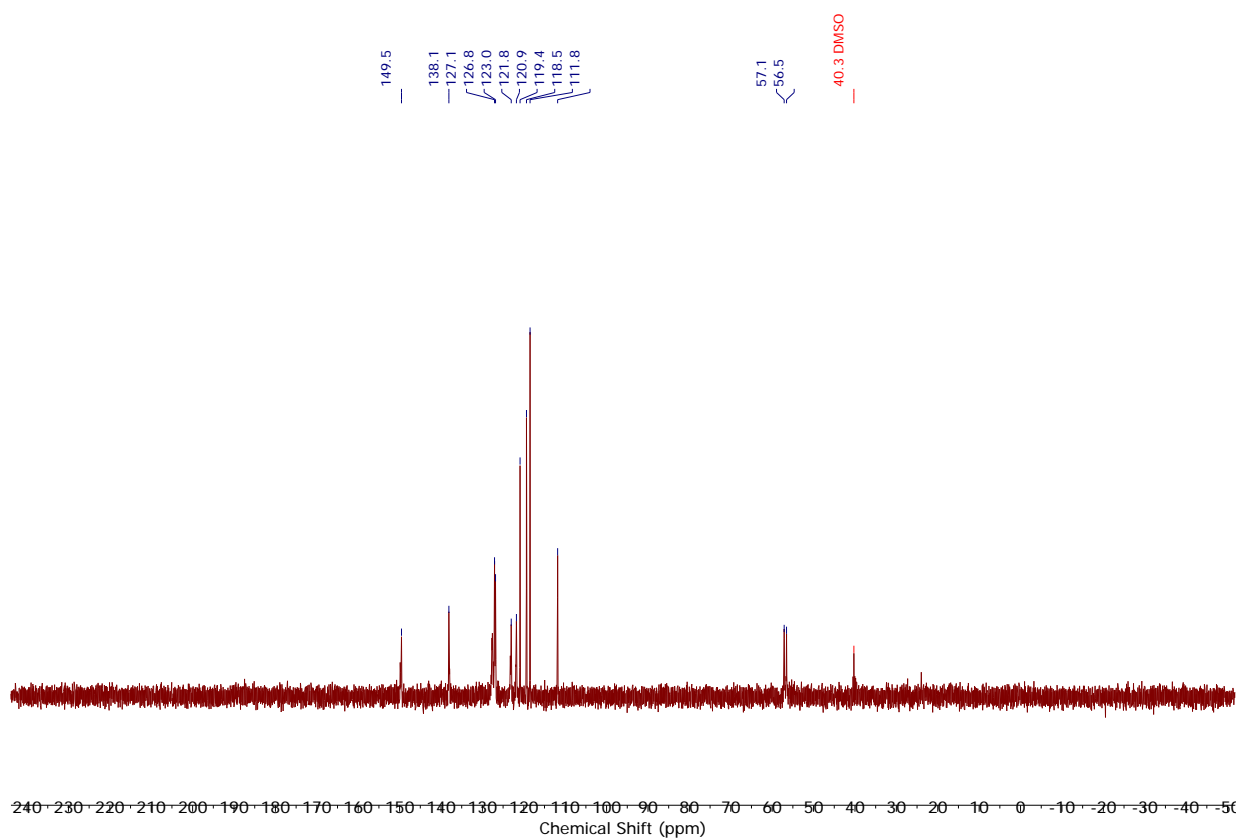

Figure S38. DEPT-90 spectrum (101 MHz,  $\text{DMSO-d}_6$ ) of L1.

# SUPPORTING INFORMATION

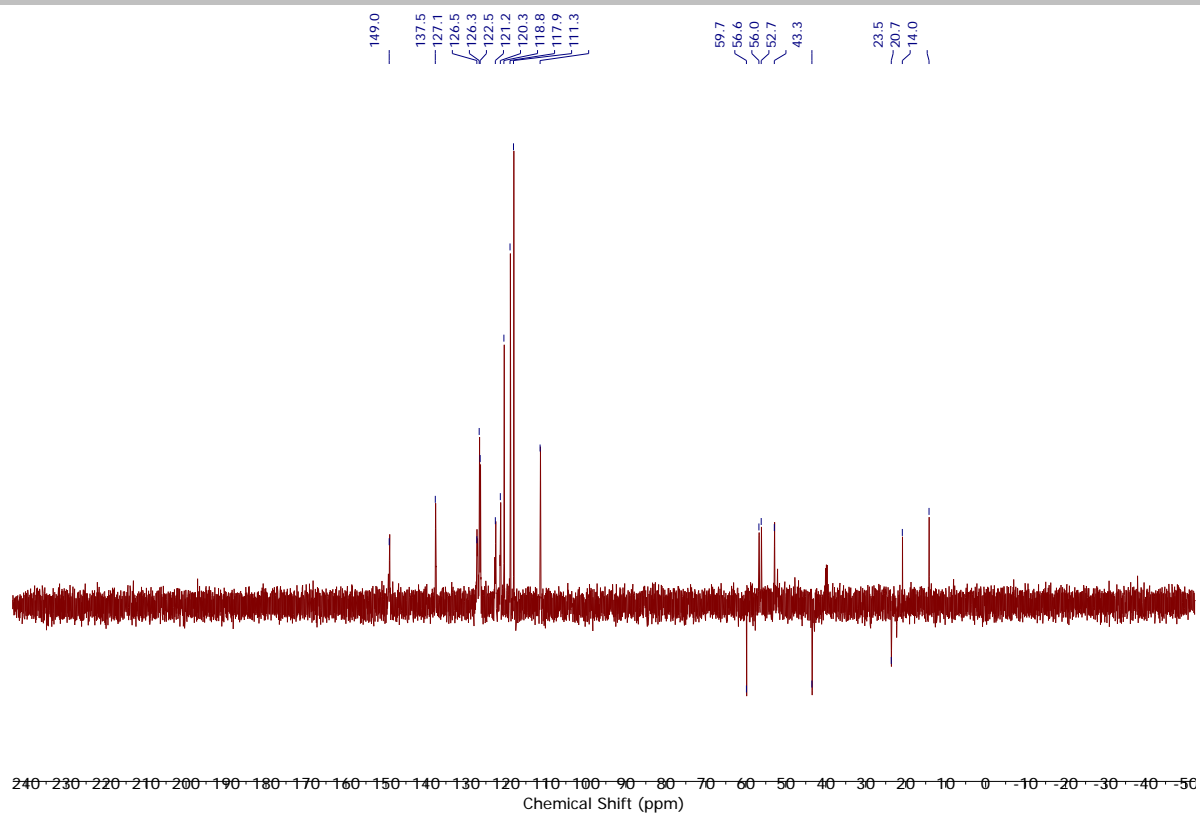

**Figure S39.** DEPT-135 spectrum (101 MHz, DMSO- $d_6$ ) of **L1**.

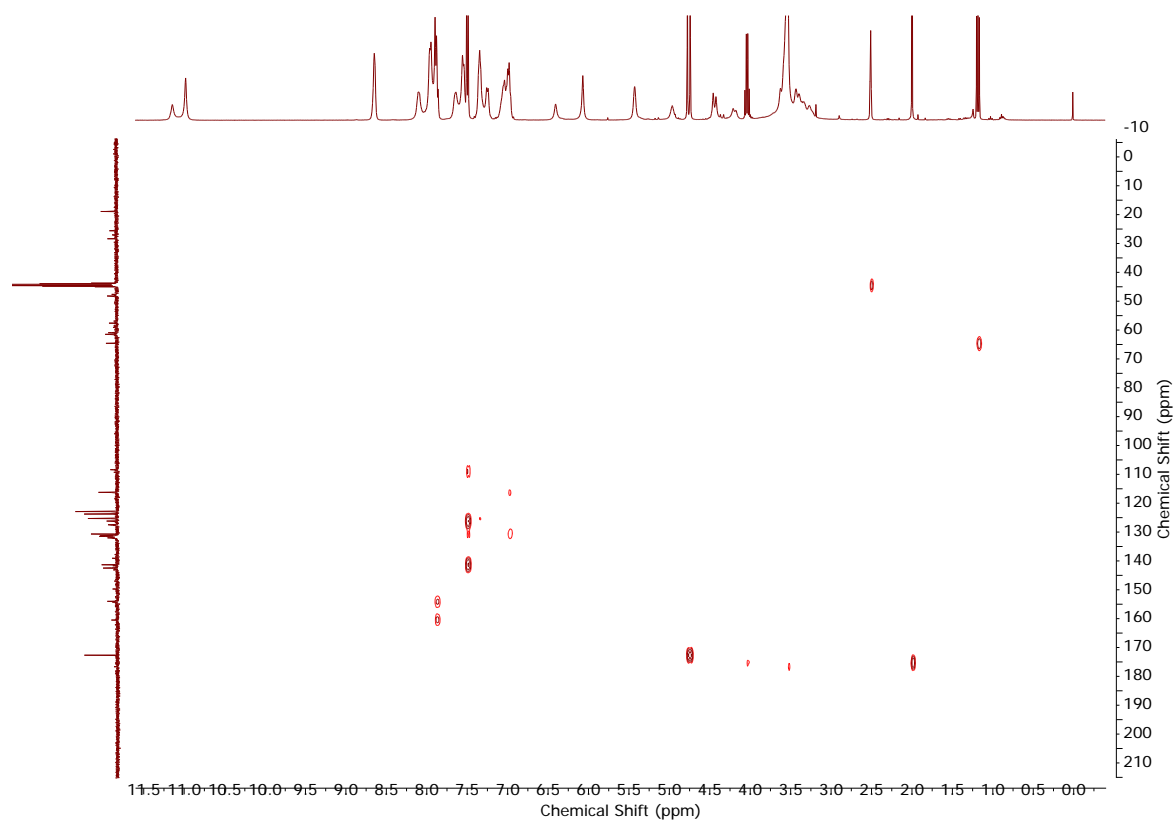

**Figure S40.** HMBC spectrum (400 MHz, DMSO- $d_6$ ) of **L1**.

## SUPPORTING INFORMATION

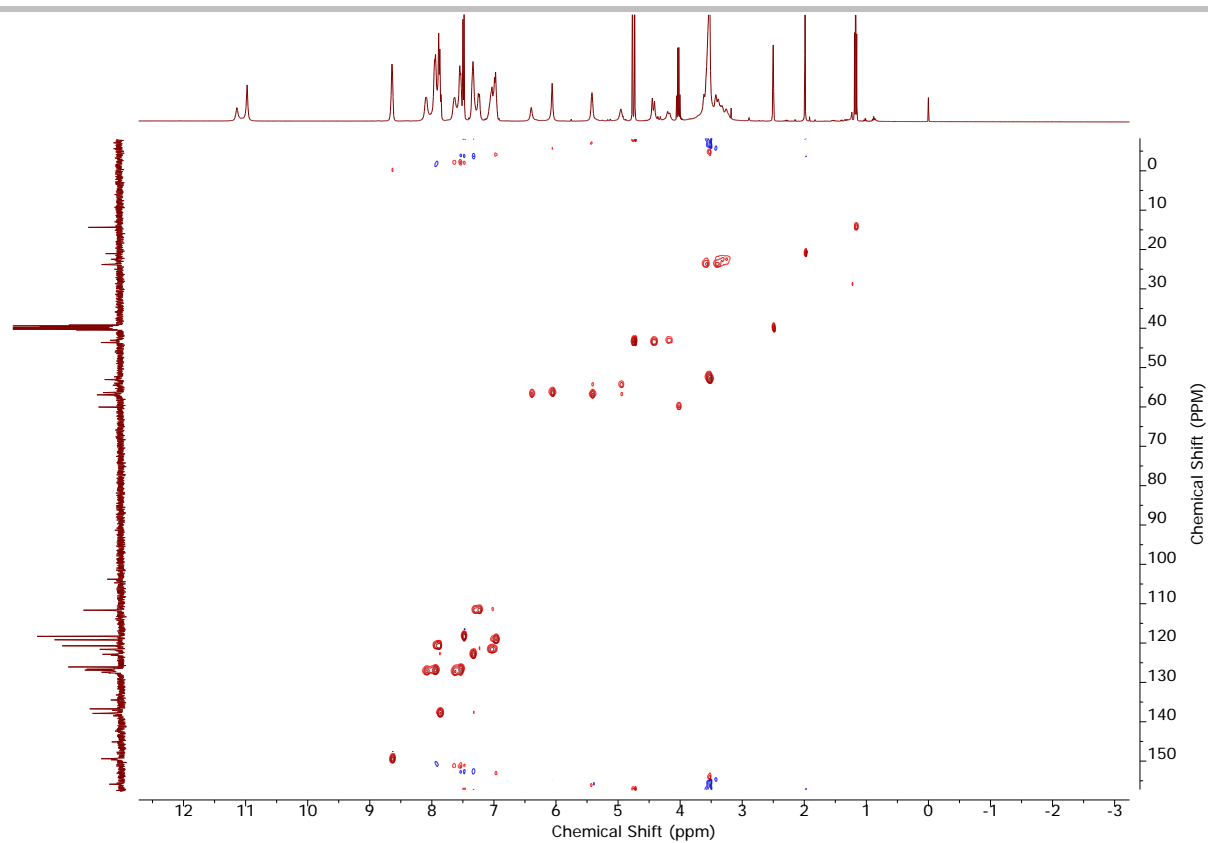

**Figure S41.** HSQC spectrum (400 MHz, DMSO-*d*<sub>6</sub>) of L1.

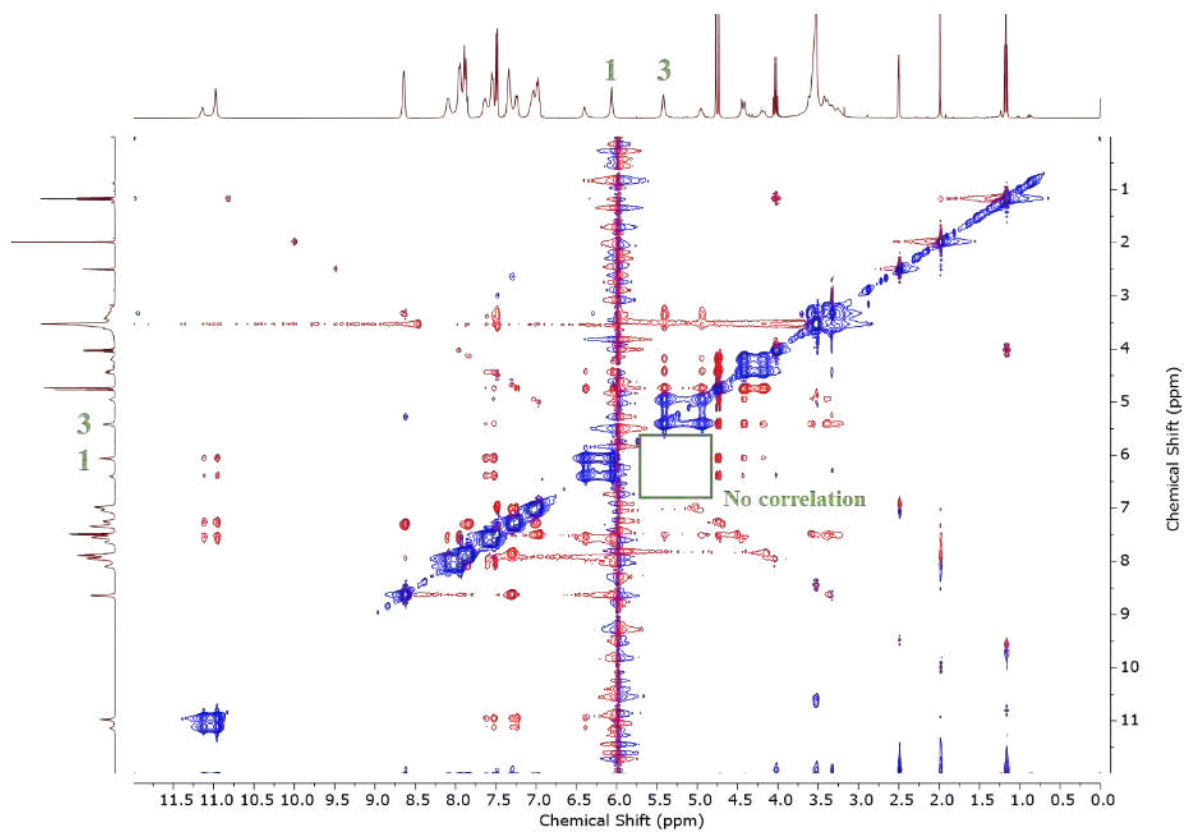

**Figure S42.** NOESY spectrum (400 MHz, DMSO-*d*<sub>6</sub>) of L1.

# SUPPORTING INFORMATION

Ligand (1S, 3R) #114 RT: 1.11 AV: 1 NL: 4.34E7  
T: FTMS + p ESI Full ms [100.0000-500.0000]

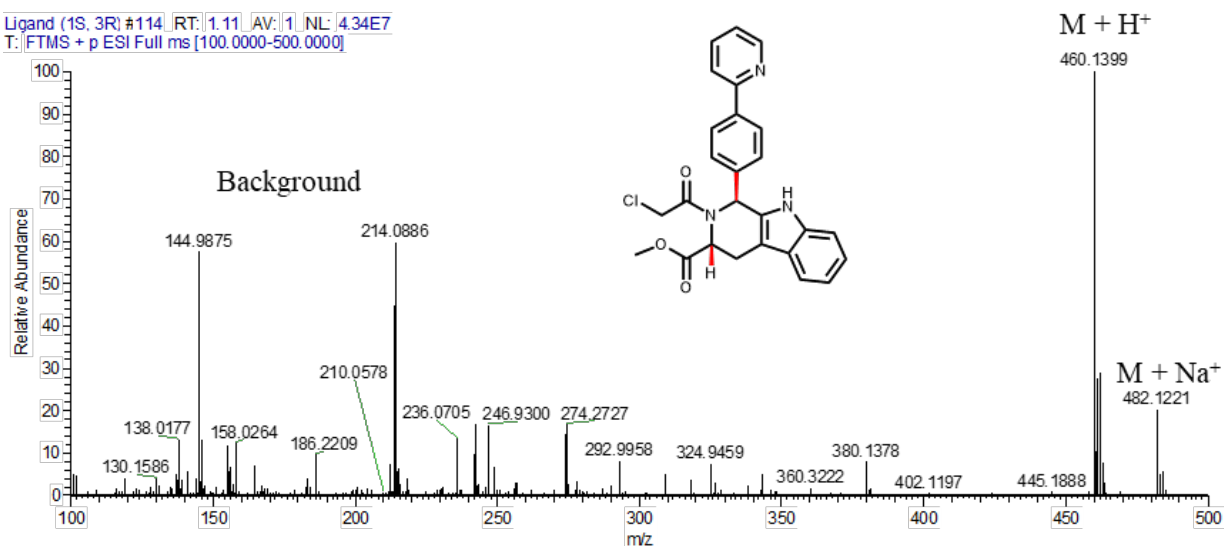

Figure S43. HRMS spectrum of L1.

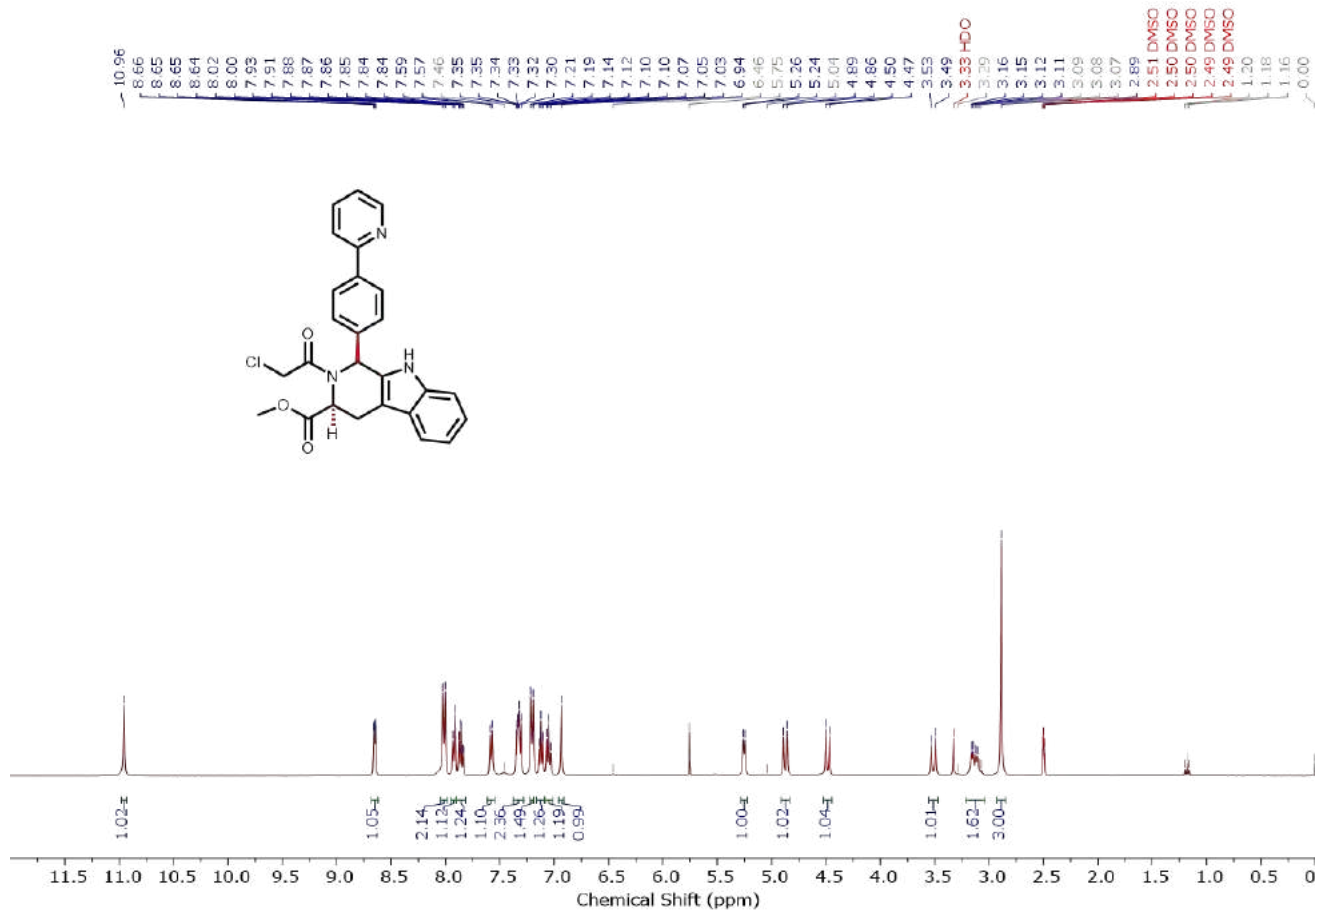

Figure S44. <sup>1</sup>H NMR spectrum (400 MHz, DMSO-d<sub>6</sub>) of L4.

# SUPPORTING INFORMATION

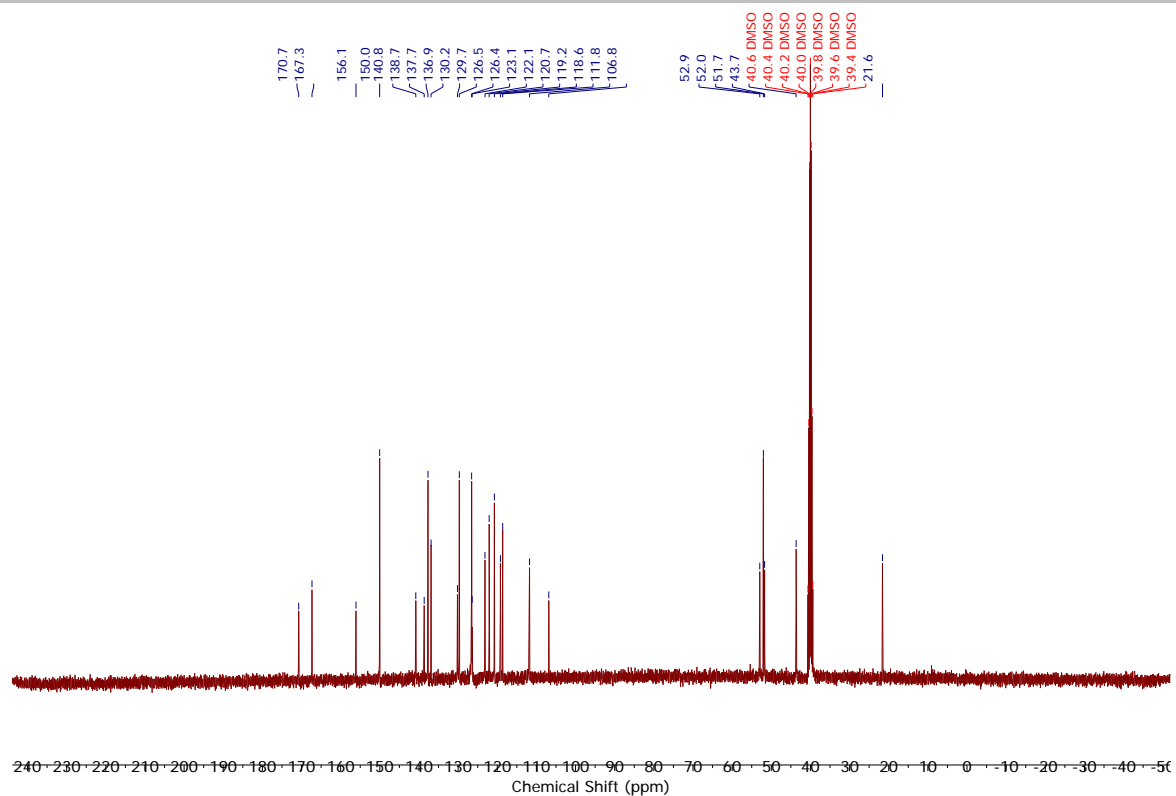

Figure S45.  $^{13}\text{C}$  NMR spectrum (101 MHz,  $\text{DMSO-d}_6$ ) of L4.

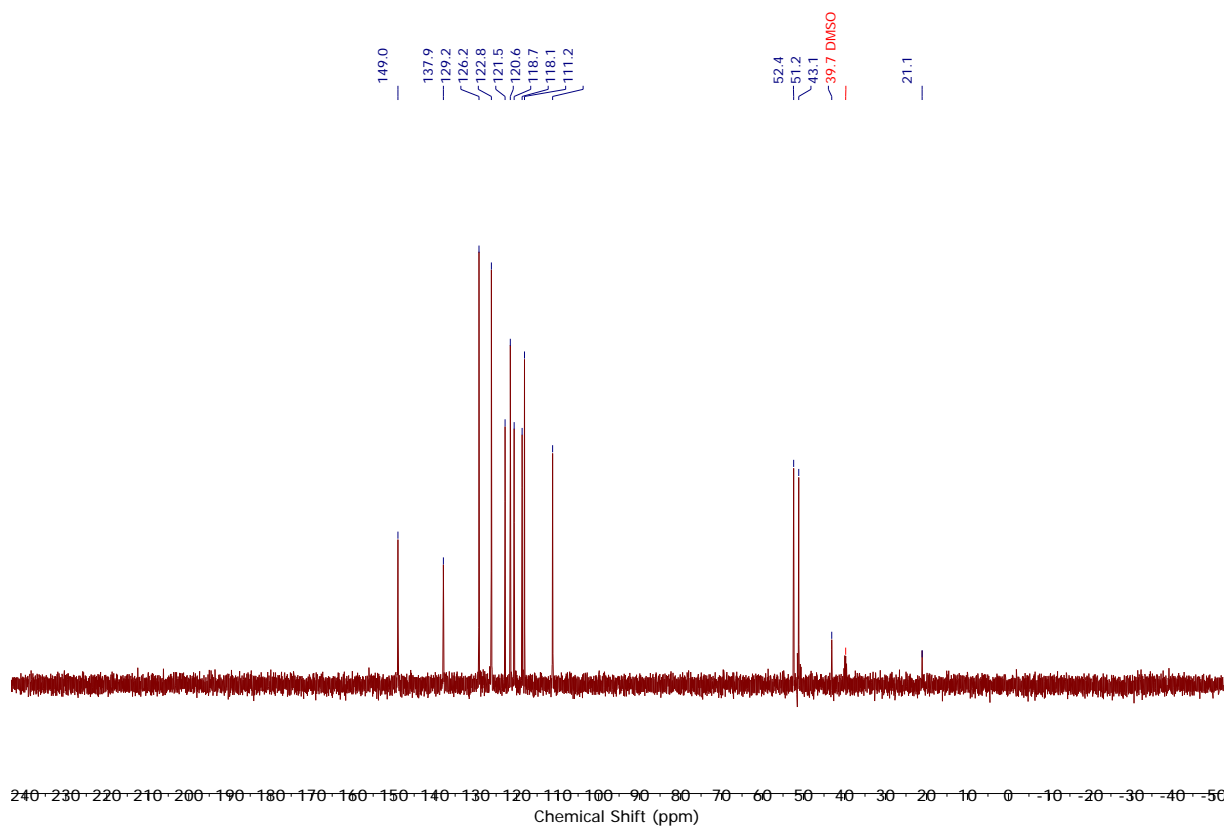

Figure S46. DEPT-90 NMR spectrum (101 MHz,  $\text{DMSO-d}_6$ ) of L4.

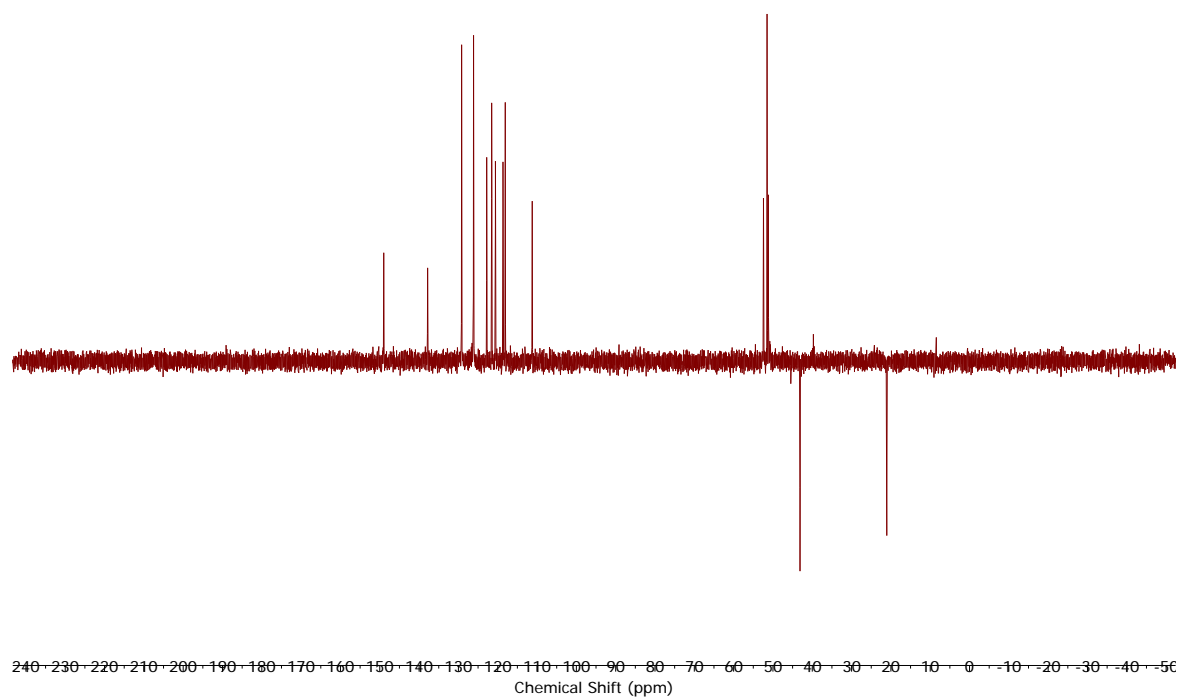

Figure S47. DEPT-135 NMR spectrum (101 MHz, DMSO-d<sub>6</sub>) of L4.

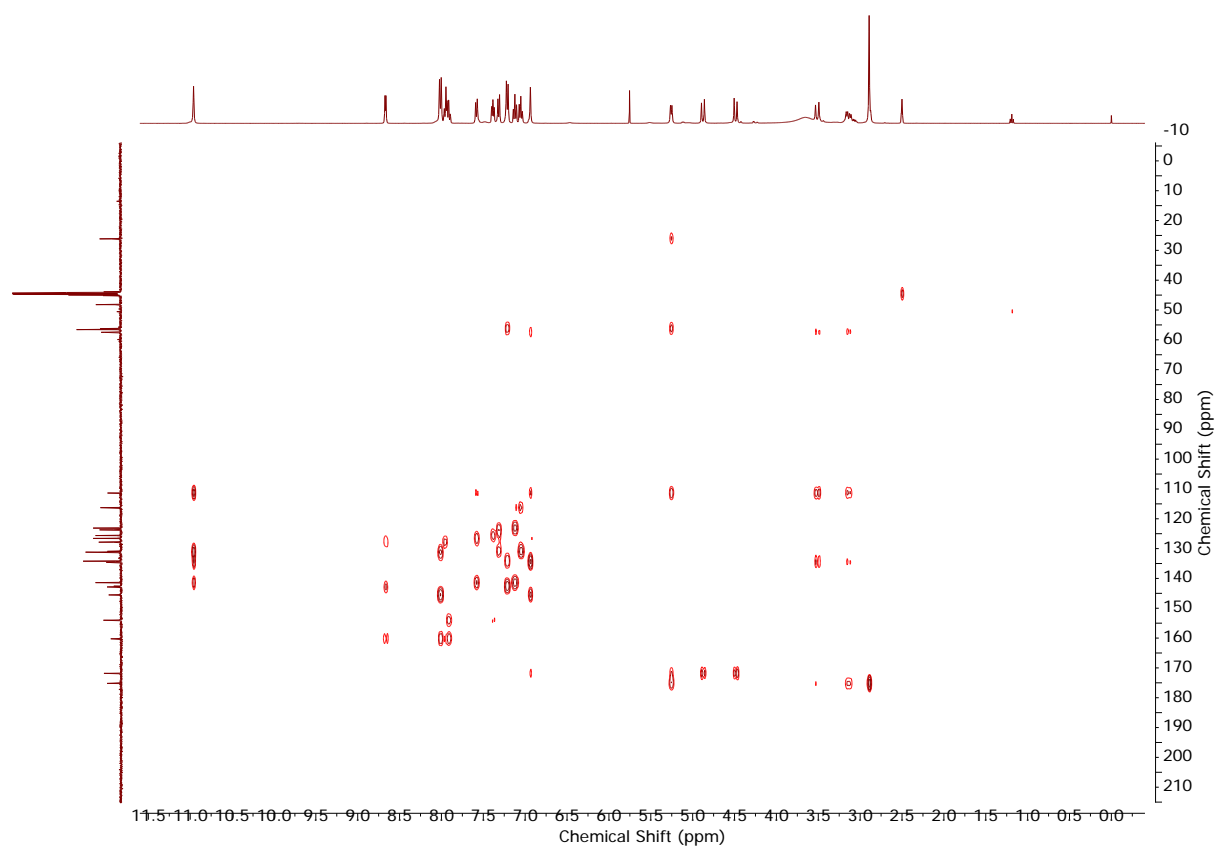

Figure S48. HMBC NMR spectrum (400 MHz, DMSO-d<sub>6</sub>) of L4.

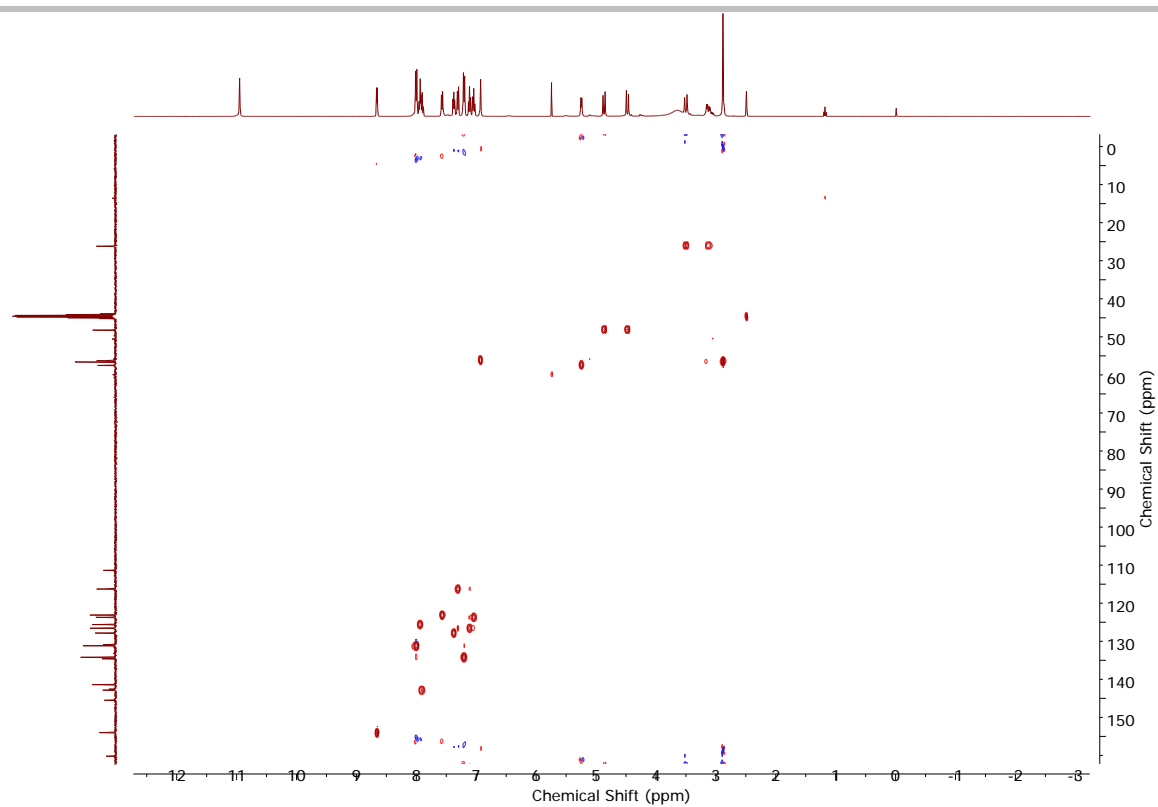

Figure S49. HSQC NMR spectrum (400 MHz, DMSO-d<sub>6</sub>) of L4.

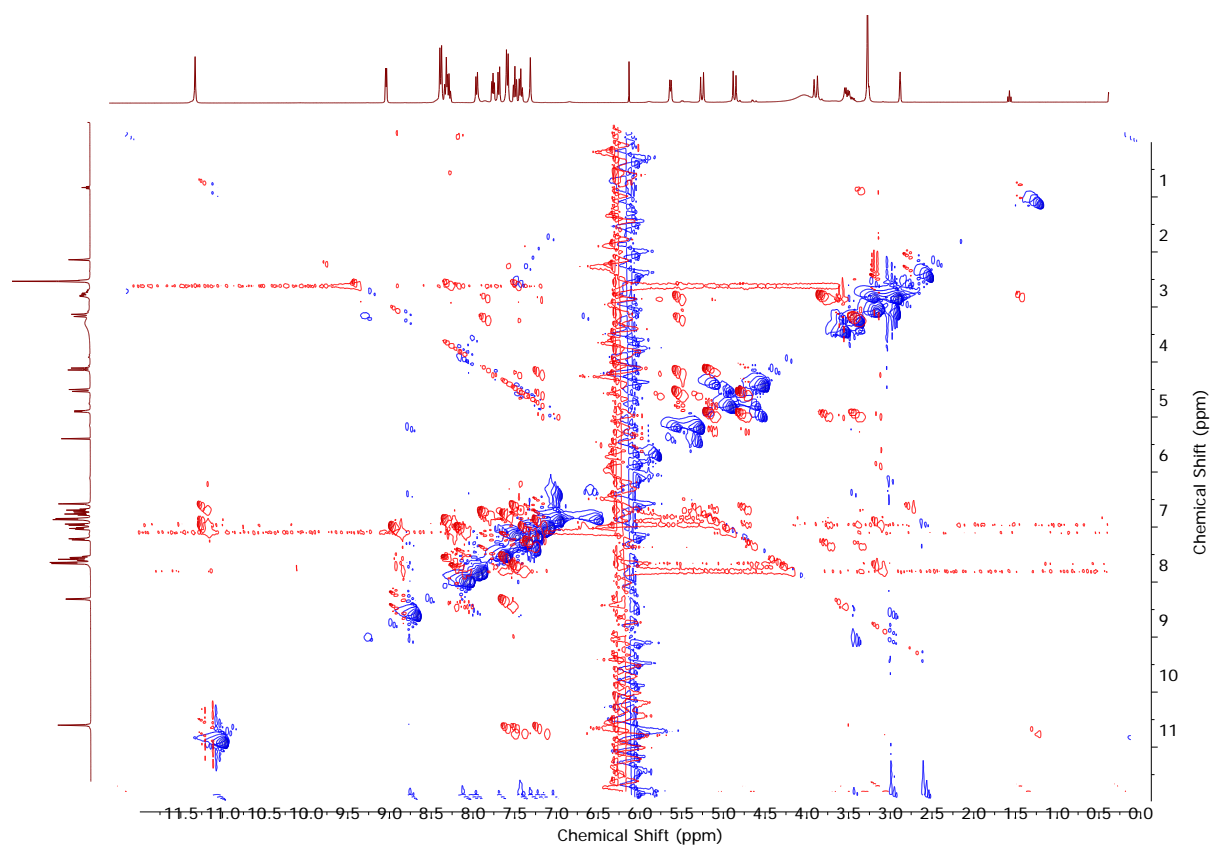



# SUPPORTING INFORMATION

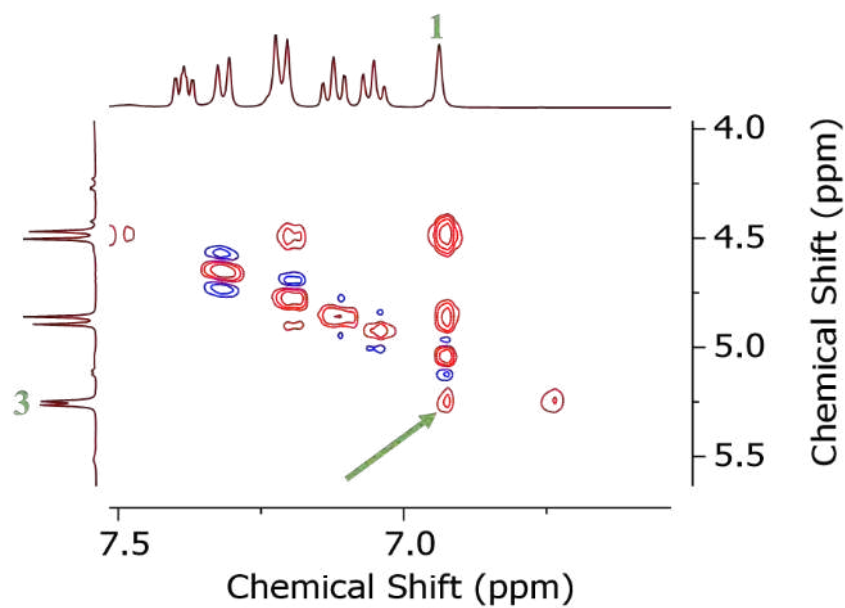

**Figure S50.** NOESY NMR spectrum (400 MHz, DMSO- $d_6$ ) of **L4**.

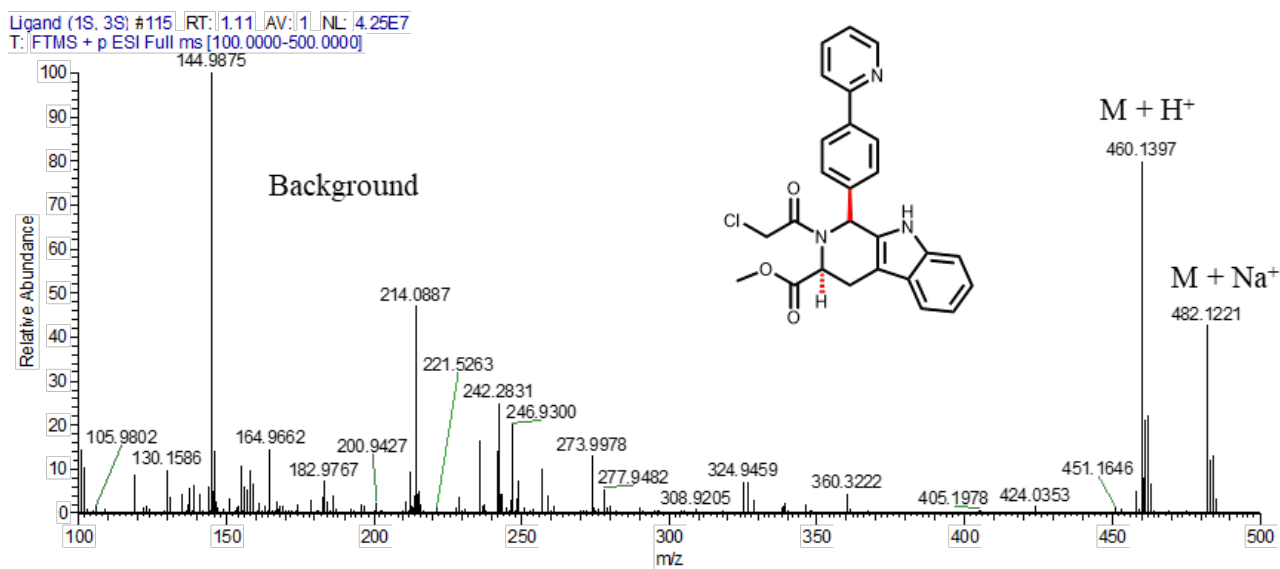

**Figure S51.** HRMS (solvent: MeCN) spectrum of **L4**.

# SUPPORTING INFORMATION

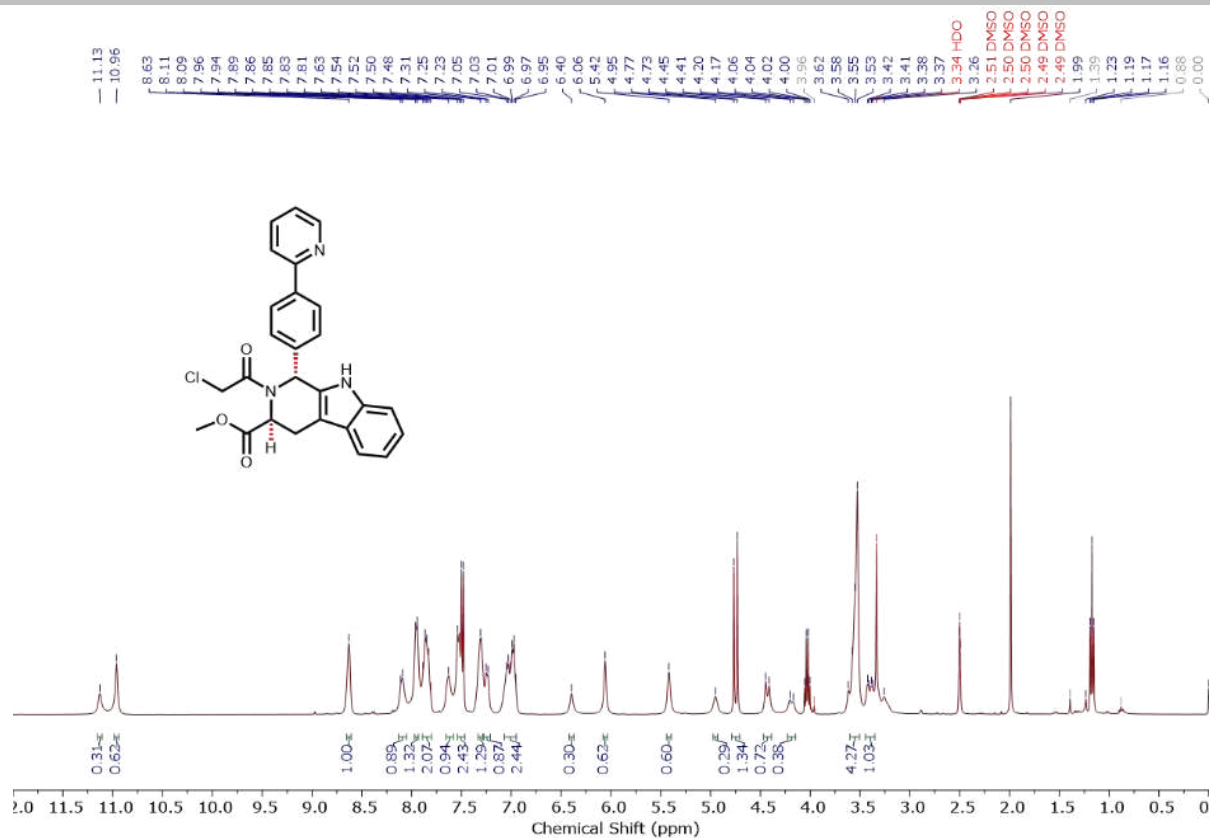

Figure S52. <sup>1</sup>H NMR spectrum (400 MHz, DMSO-d<sub>6</sub>) of L3.

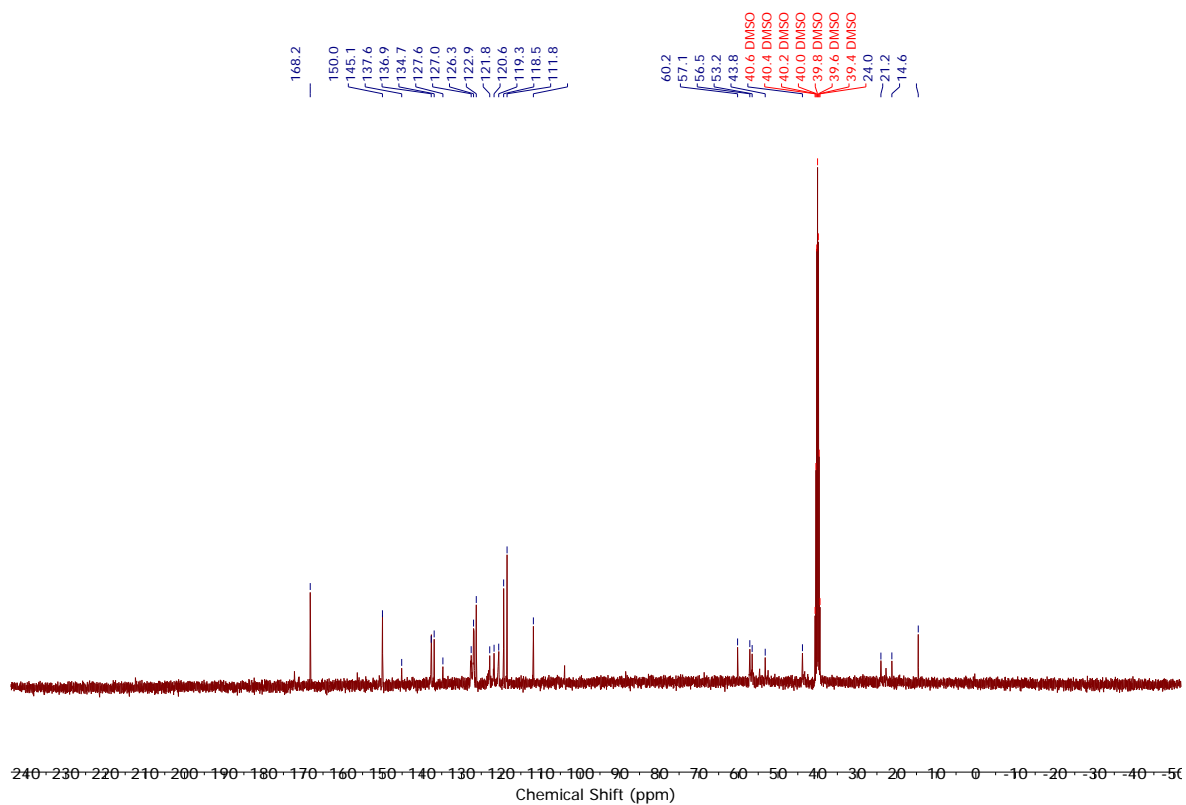

Figure S53. <sup>13</sup>C NMR spectrum (101 MHz, DMSO-d<sub>6</sub>) of L3.

## SUPPORTING INFORMATION

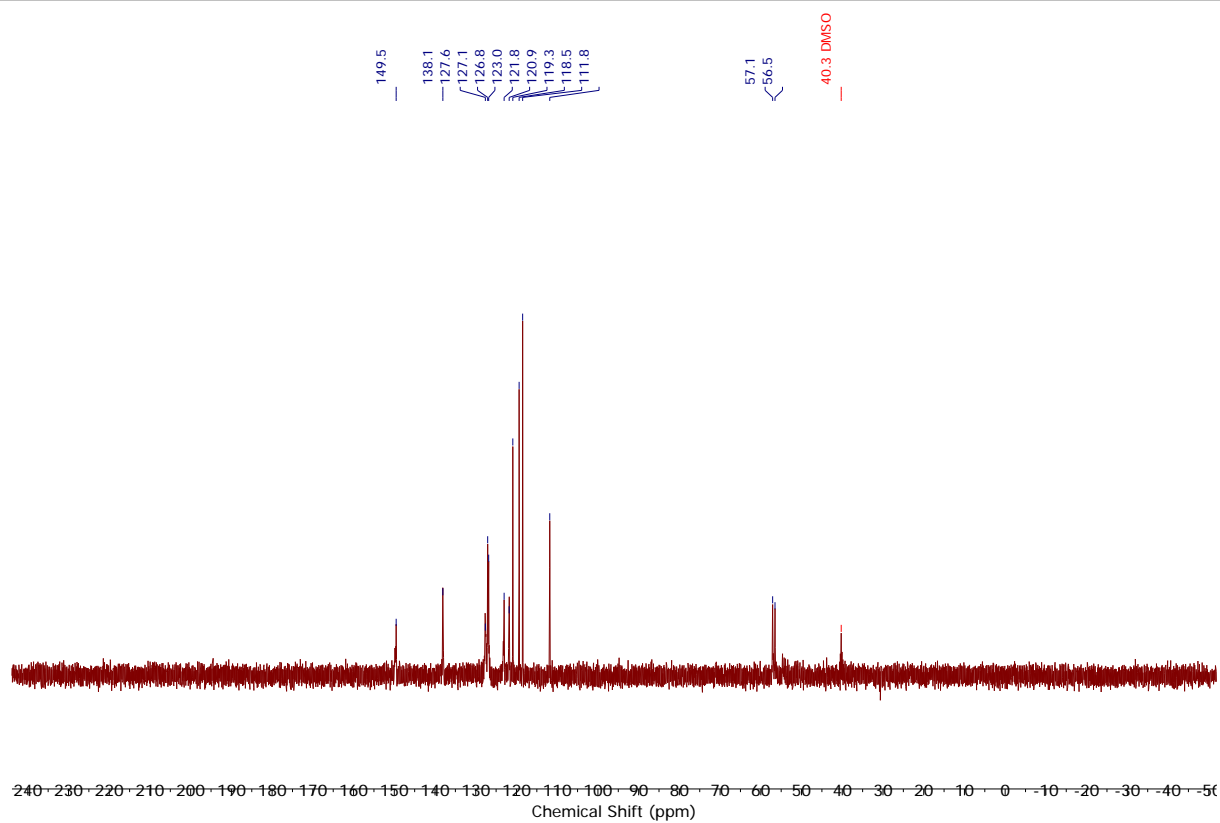

Figure S54. DEPT-90 NMR spectrum (101 MHz, DMSO- $d_6$ ) of L3.

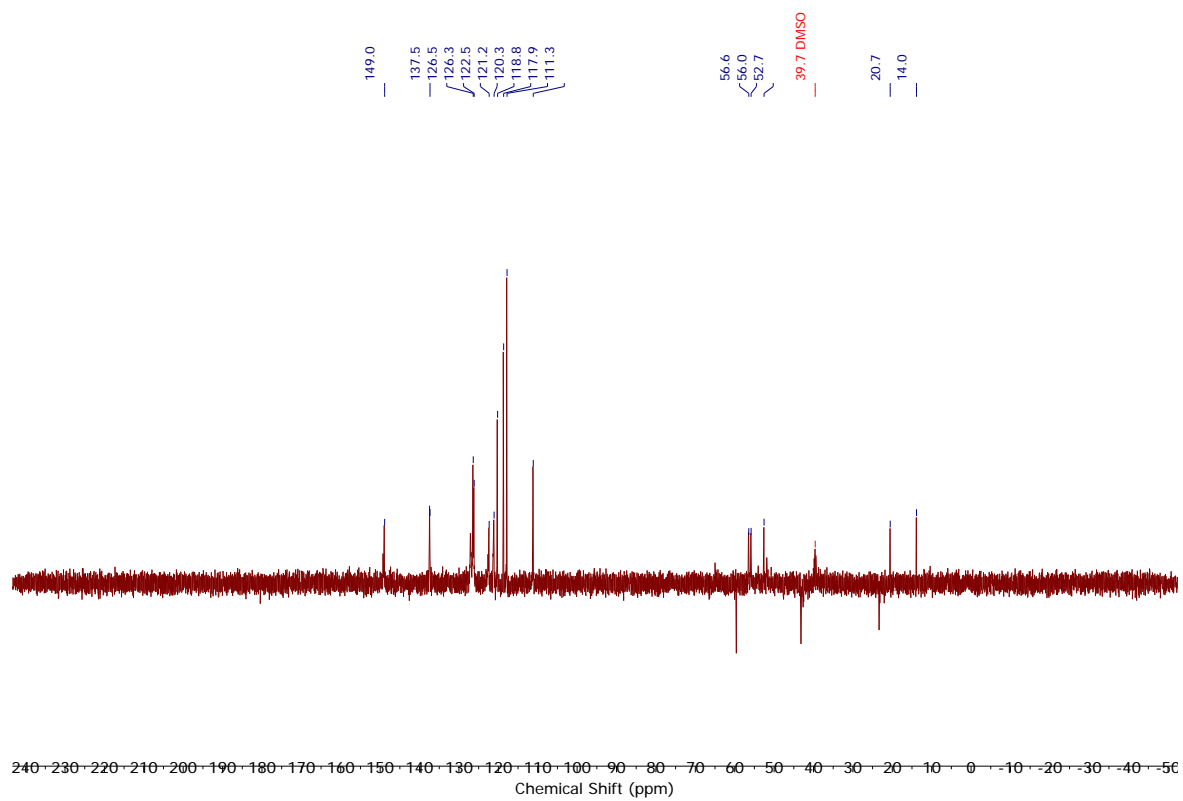

Figure S55. DEPT-135 NMR spectrum (101 MHz, DMSO- $d_6$ ) of L3.

## SUPPORTING INFORMATION

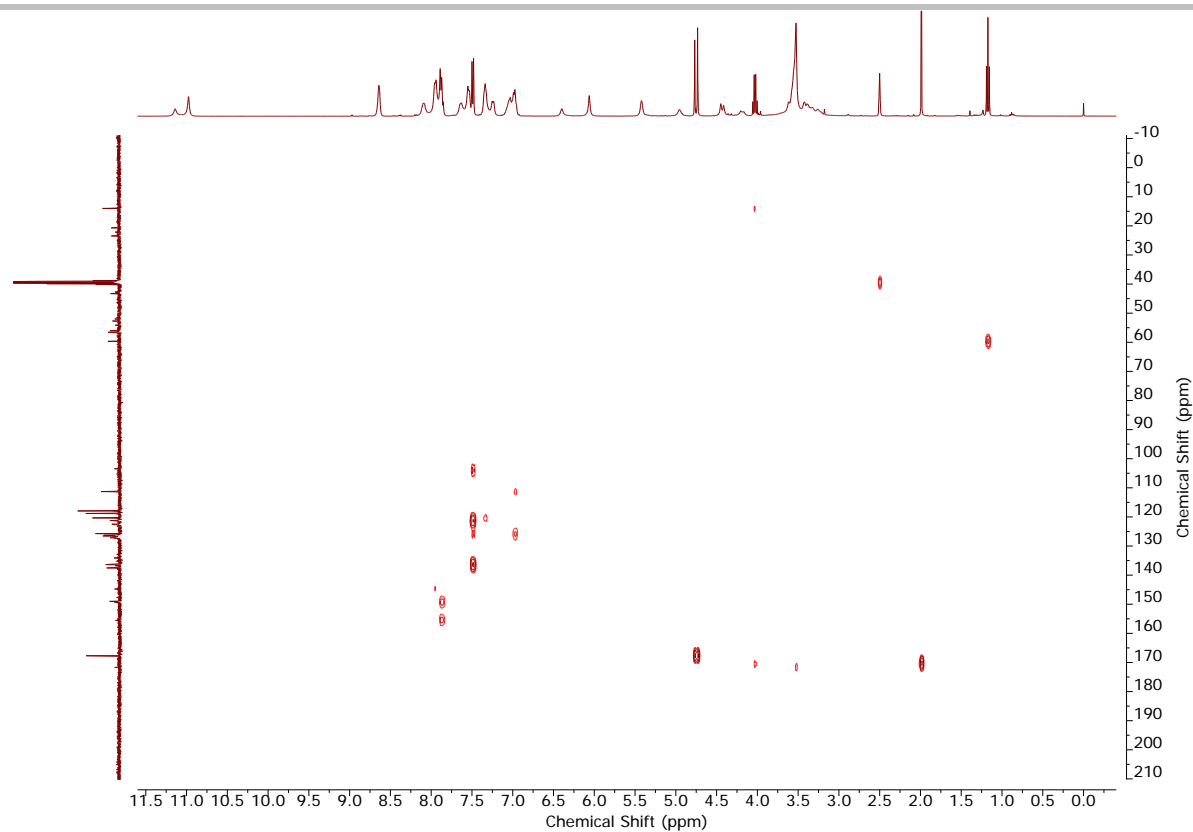

Figure S56. HMBC NMR spectrum (400 MHz, DMSO-*d*<sub>6</sub>) of L3.

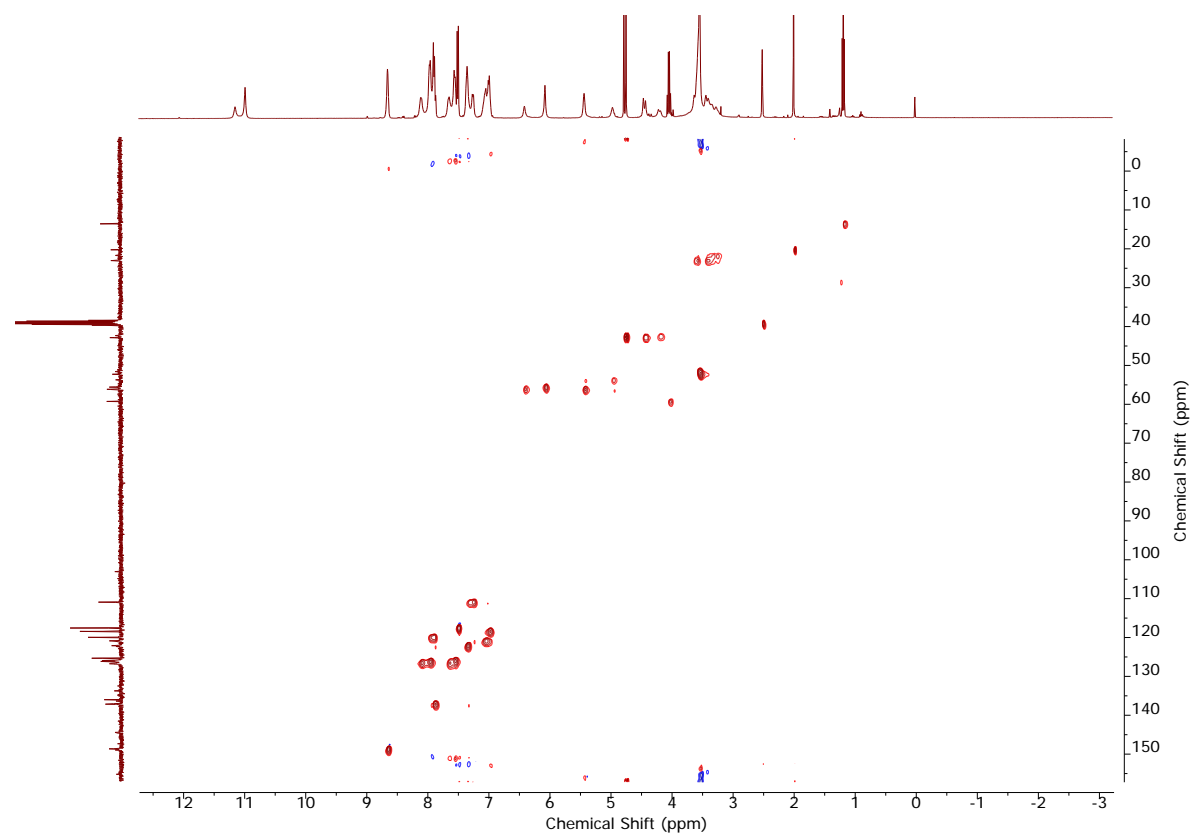

Figure S57. HSQC NMR spectrum (400 MHz, DMSO-*d*<sub>6</sub>) of L3.

# SUPPORTING INFORMATION

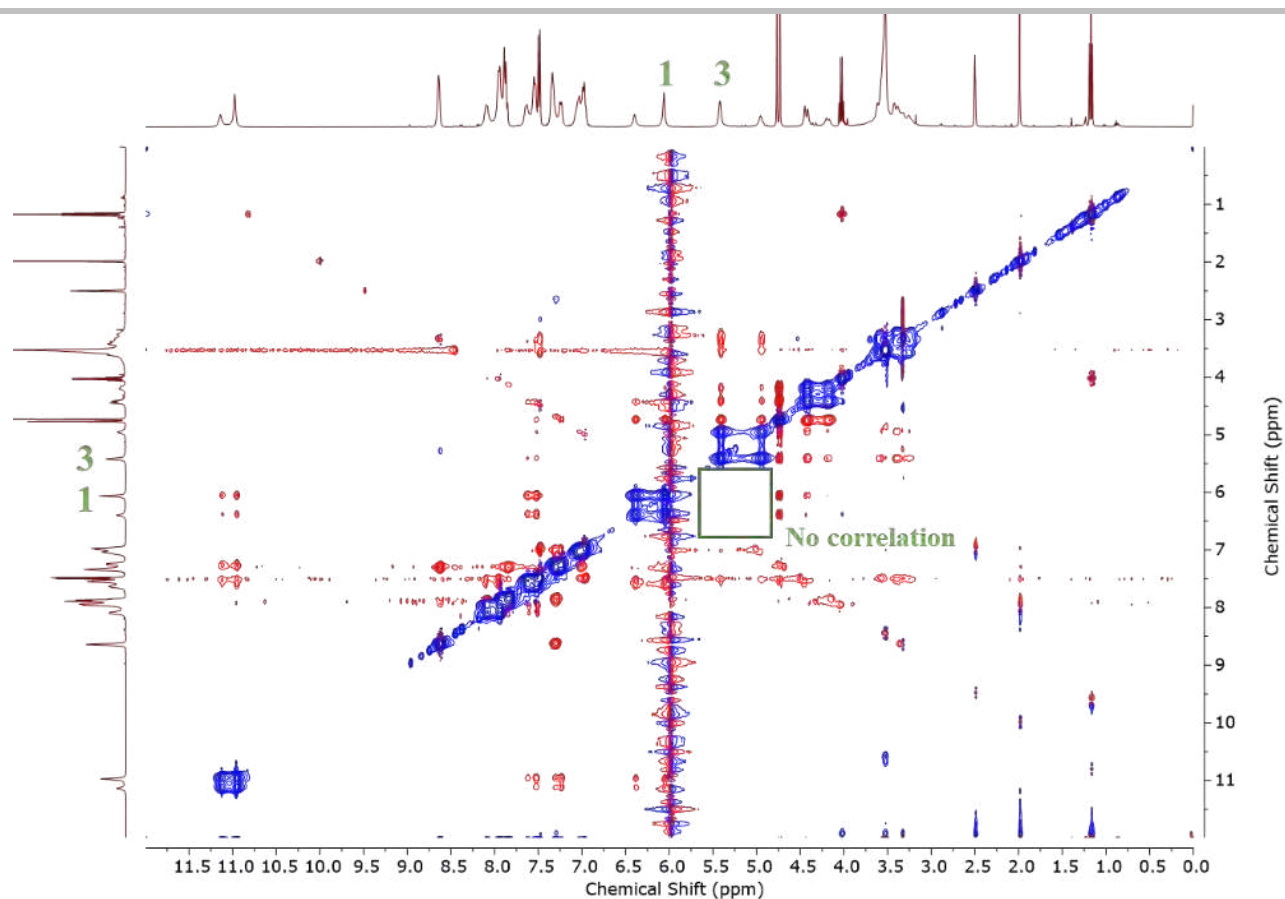

**Figure S58.** NOESY NMR spectrum (400 MHz, DMSO- $d_6$ ) of **L3**.

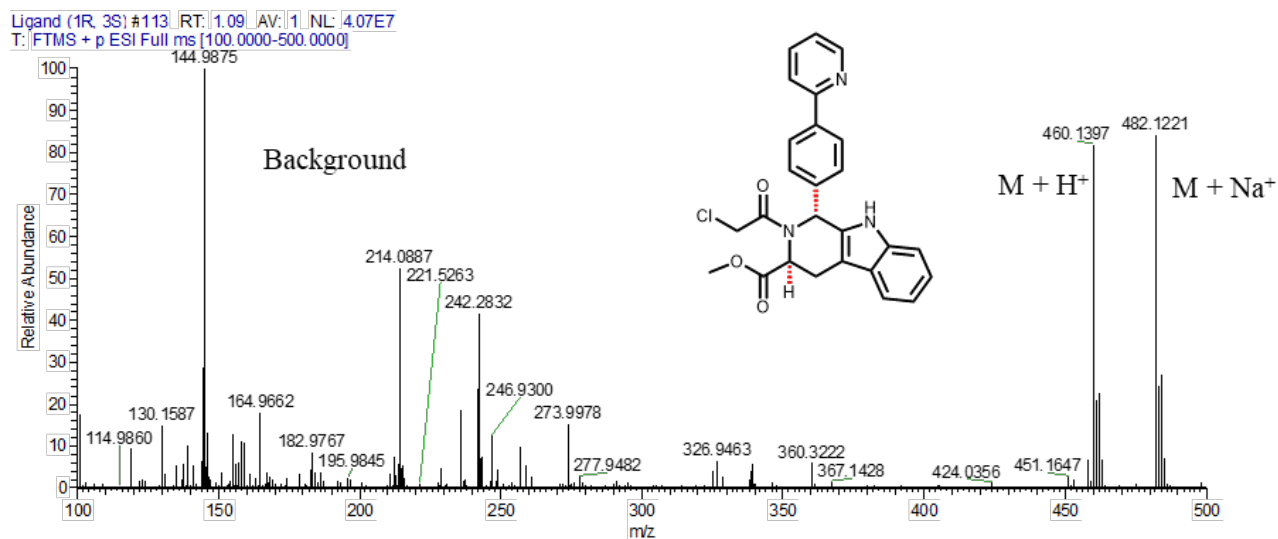

**Figure S59.** HRMS (solvent: MeCN) spectrum of **L3**.

# SUPPORTING INFORMATION

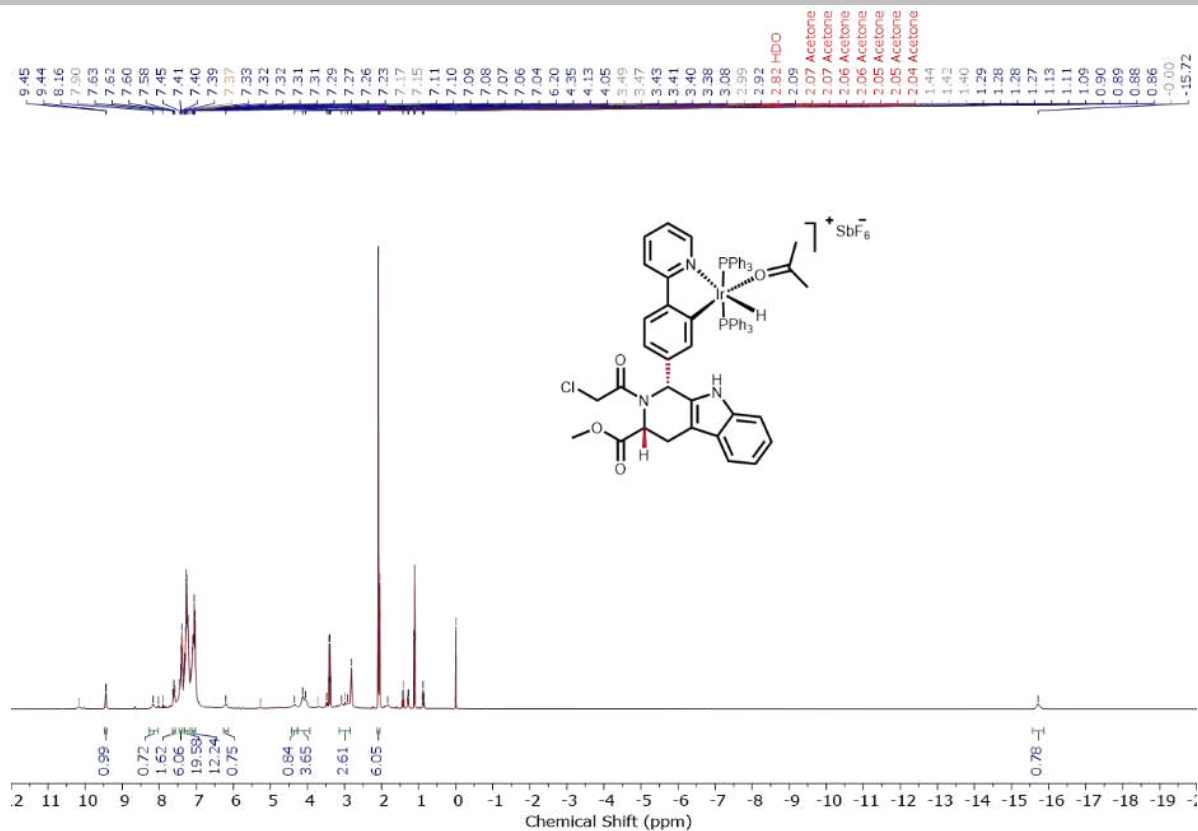

Figure S60.  $^1\text{H}$  NMR spectrum (400 MHz, Acetone- $d_6$ ) of Ir2.

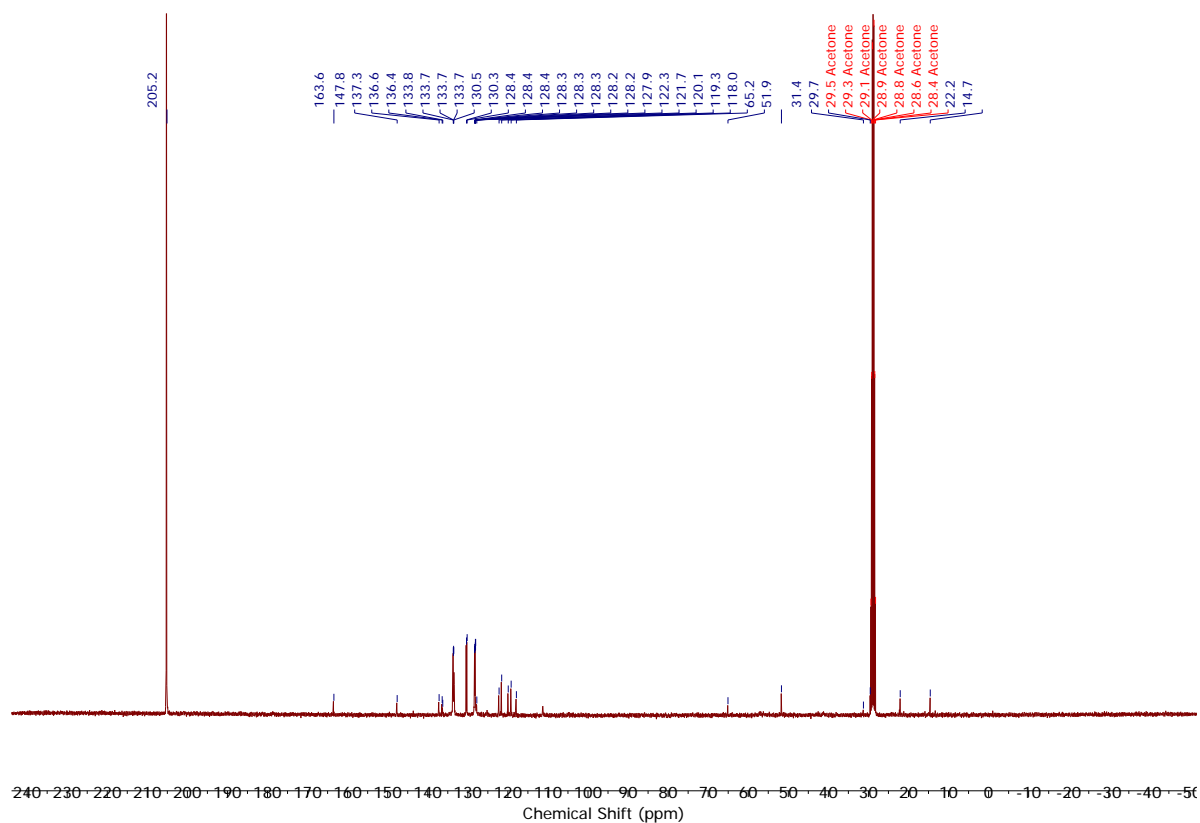

Figure S61.  $^{13}\text{C}$  NMR spectrum (101 MHz, Acetone- $d_6$ ) of Ir2.

# SUPPORTING INFORMATION

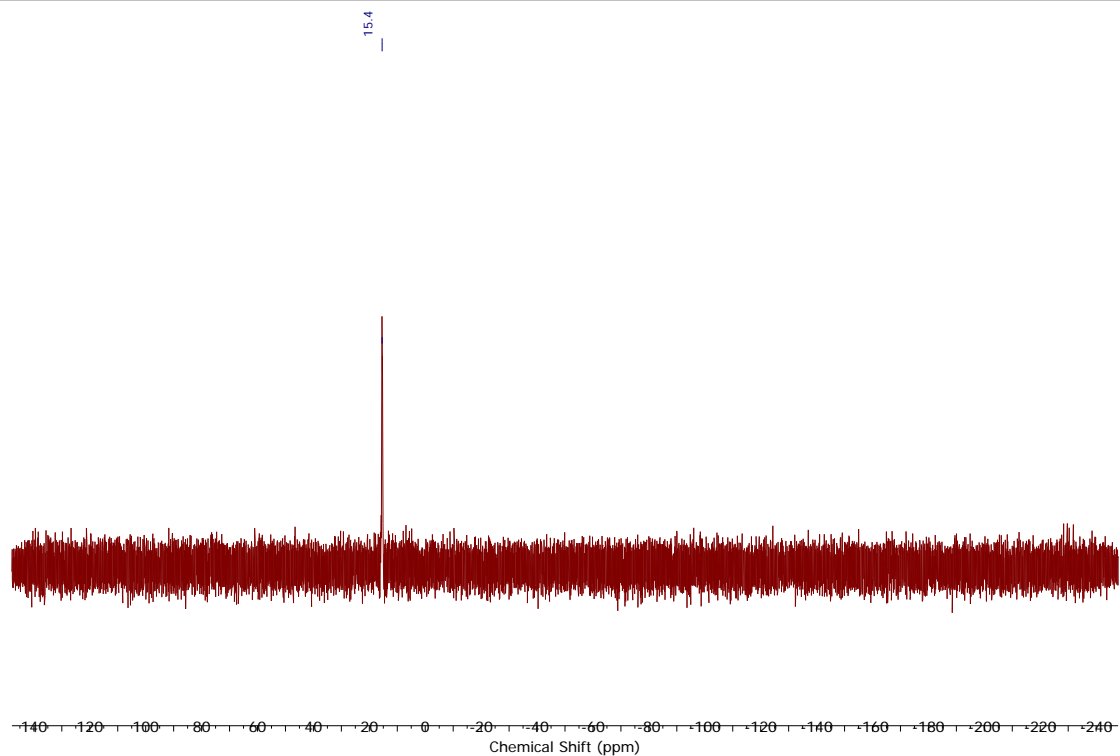

**Figure S62.**  $^{31}\text{P}$  NMR spectrum (162 MHz, Acetone- $d_6$ ) of Ir2.

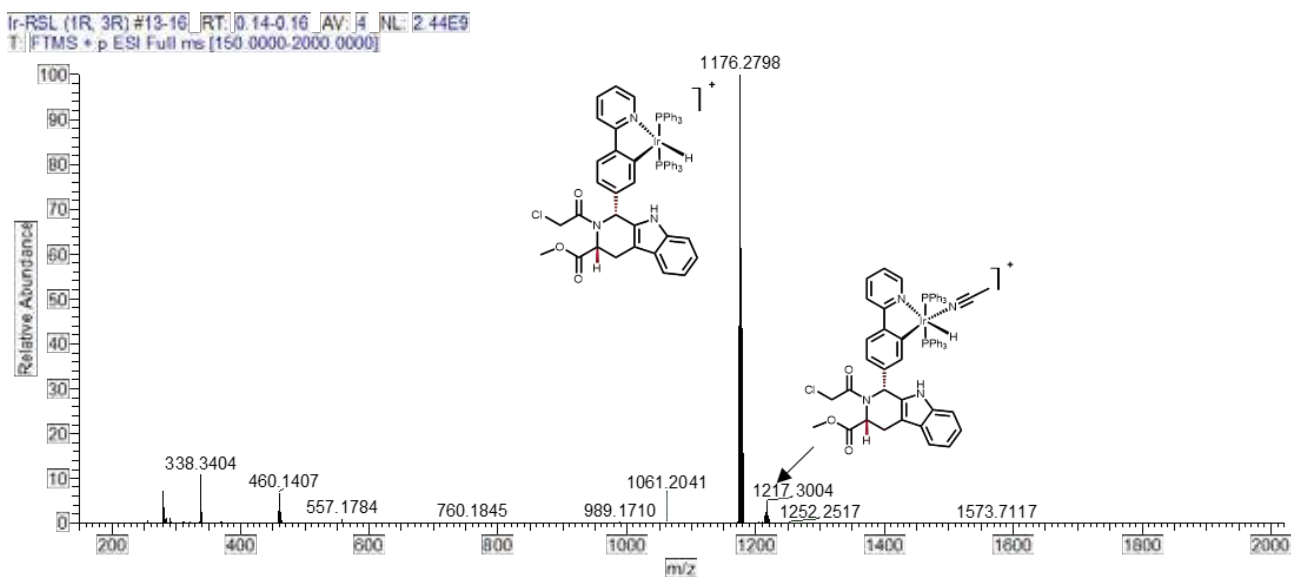

**Figure S63.** HRMS (solvent: MeCN) spectrum of Ir2.

# SUPPORTING INFORMATION

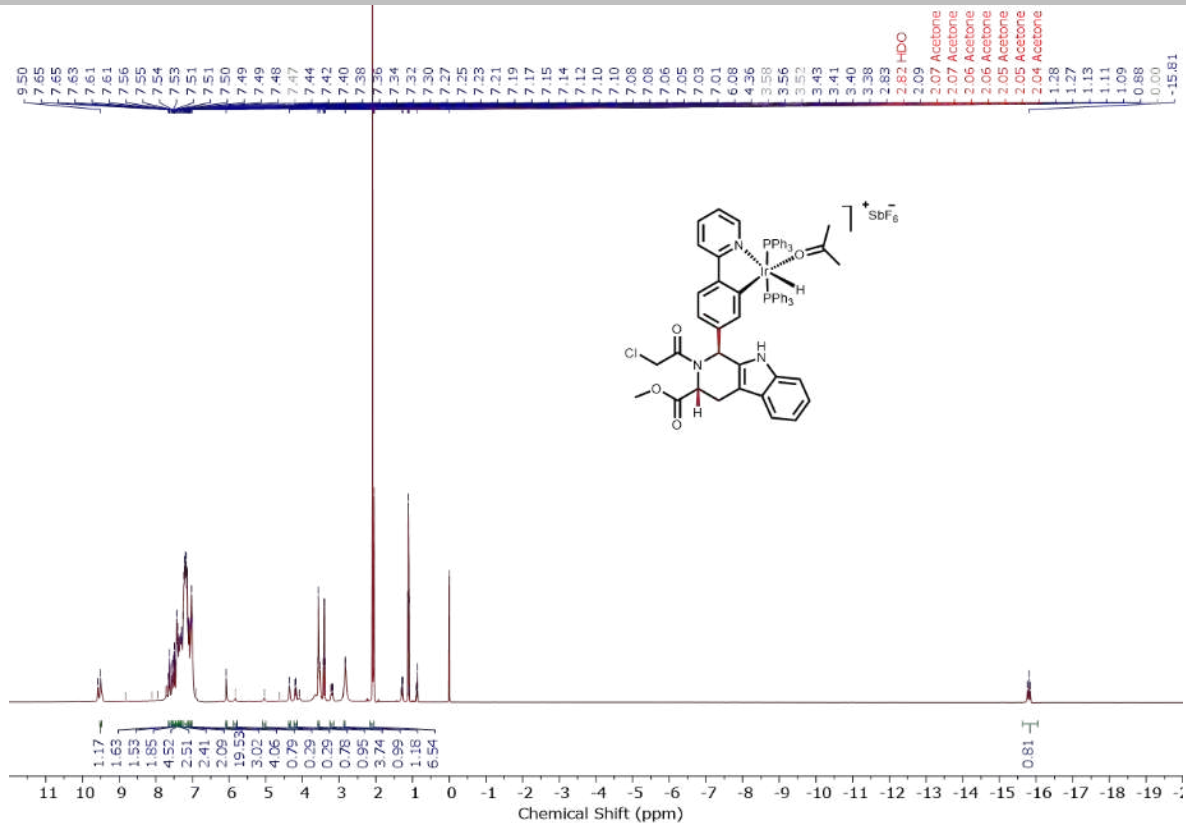

Figure S64.  $^1H$  NMR spectrum (400 MHz, Acetone- $d_6$ ) of Ir1.

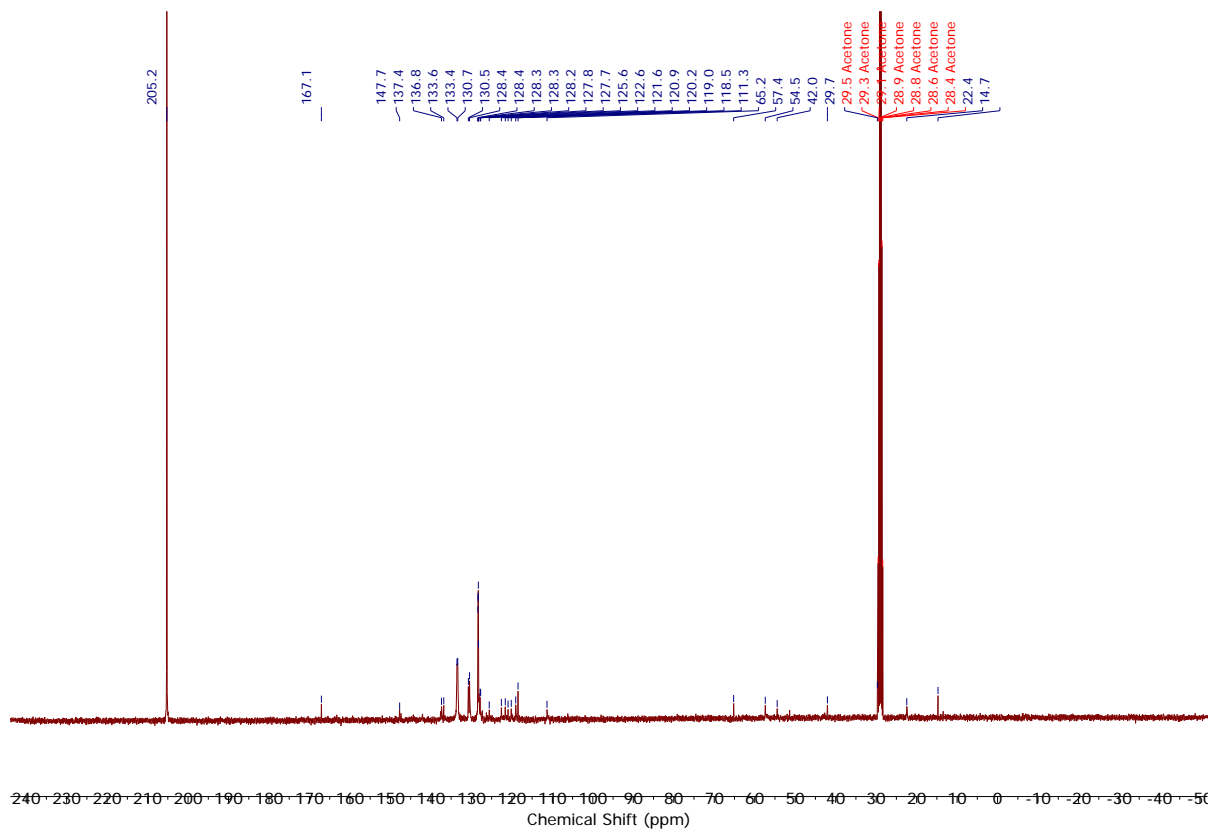

Figure S65.  $^{13}C$  NMR spectrum (101 MHz, Acetone- $d_6$ ) of Ir1.



# SUPPORTING INFORMATION

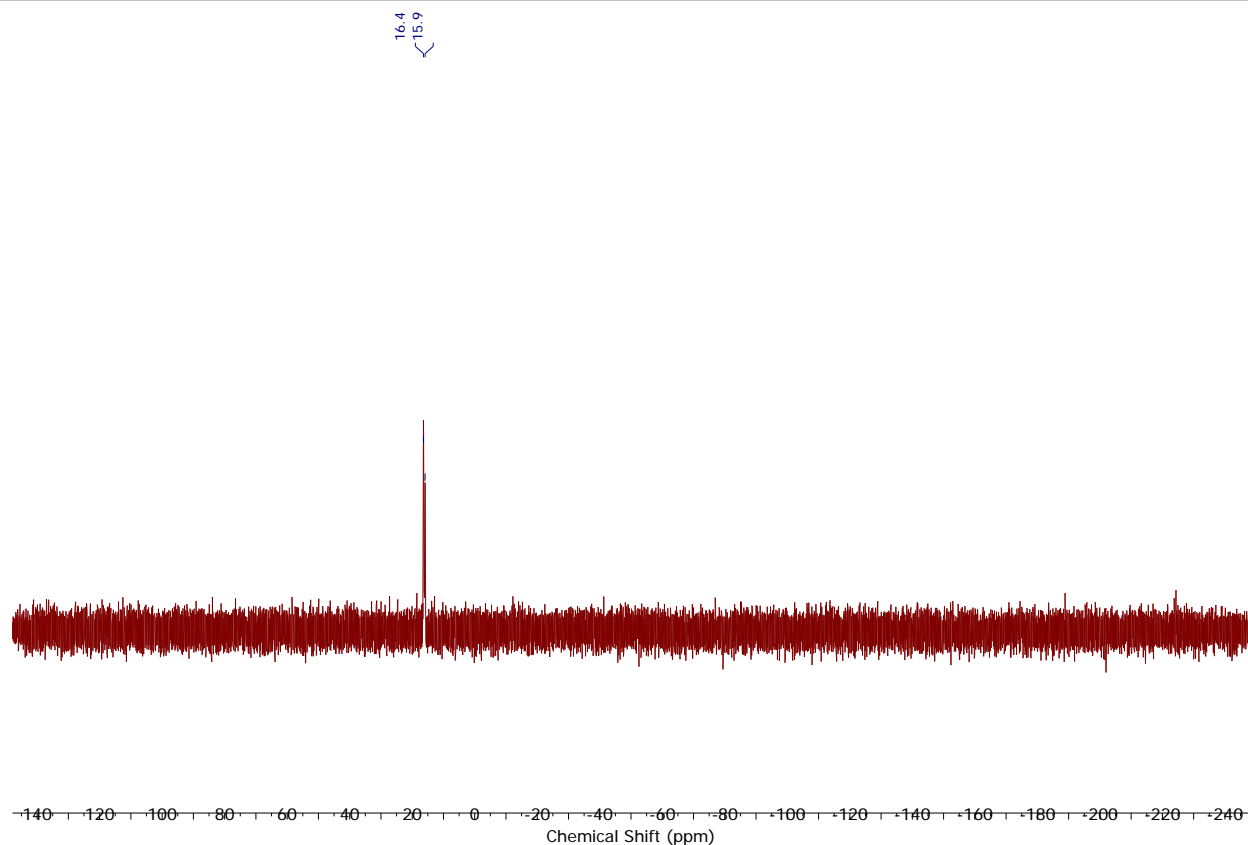

**Figure S66.**  $^{31}\text{P}$  NMR spectrum (162 MHz, Acetone- $d_6$ ) of Ir1.

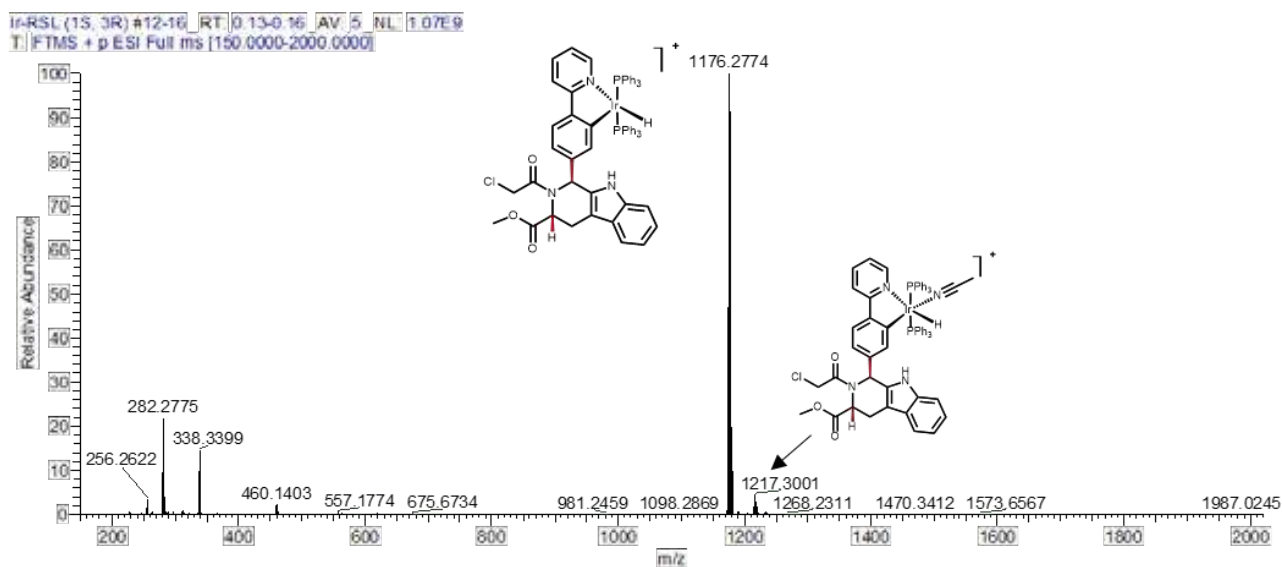

**Figure S67.** HRMS (solvent: MeCN) spectrum of Ir1.

# SUPPORTING INFORMATION

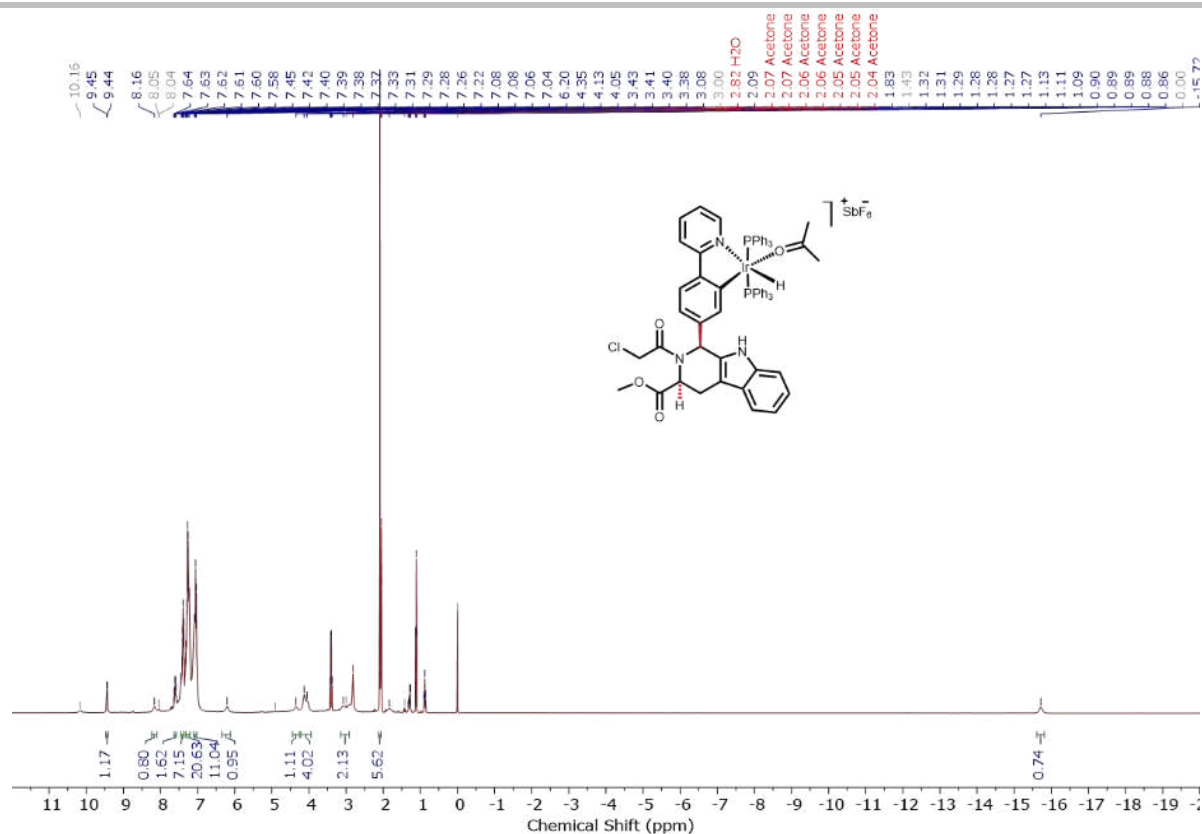

Figure S68. <sup>1</sup>H NMR spectrum (400 MHz, Acetone-d<sub>6</sub>) of Ir4.

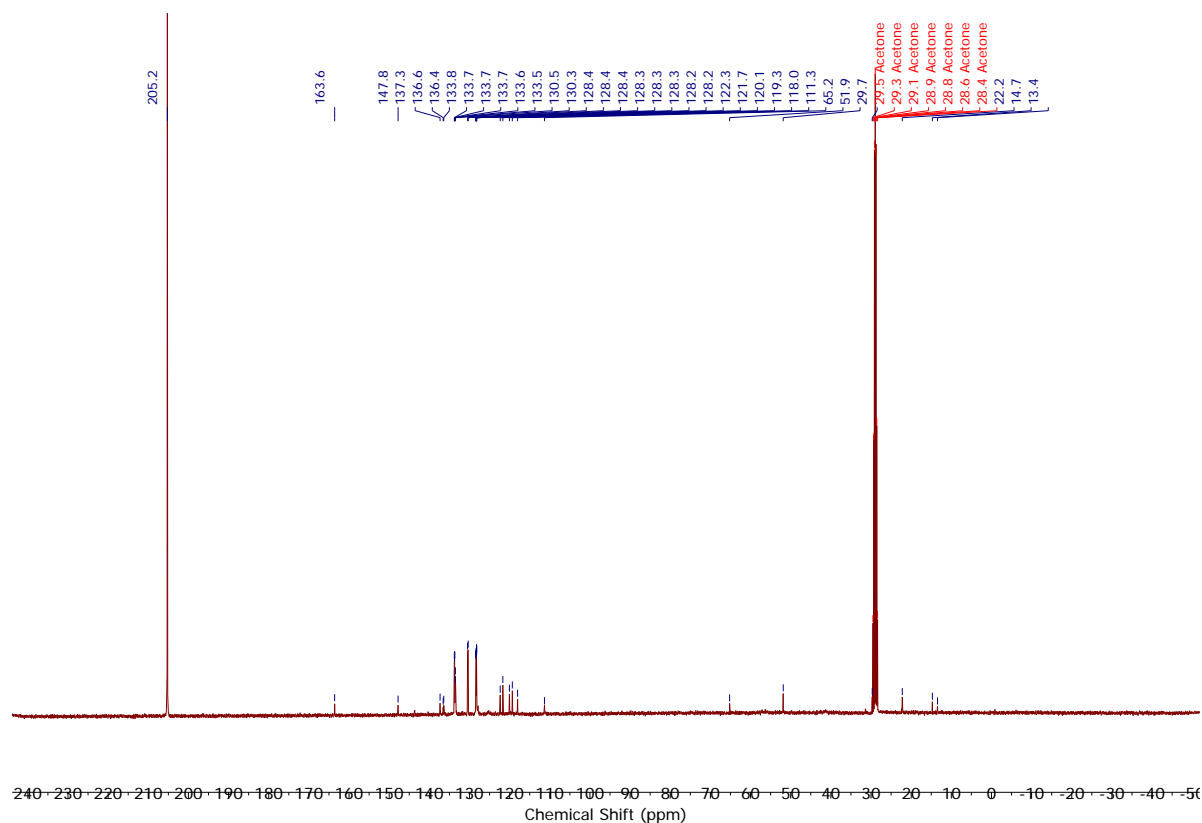

Figure S69. <sup>13</sup>C NMR spectrum (101 MHz, Acetone-d<sub>6</sub>) of Ir4.

# SUPPORTING INFORMATION

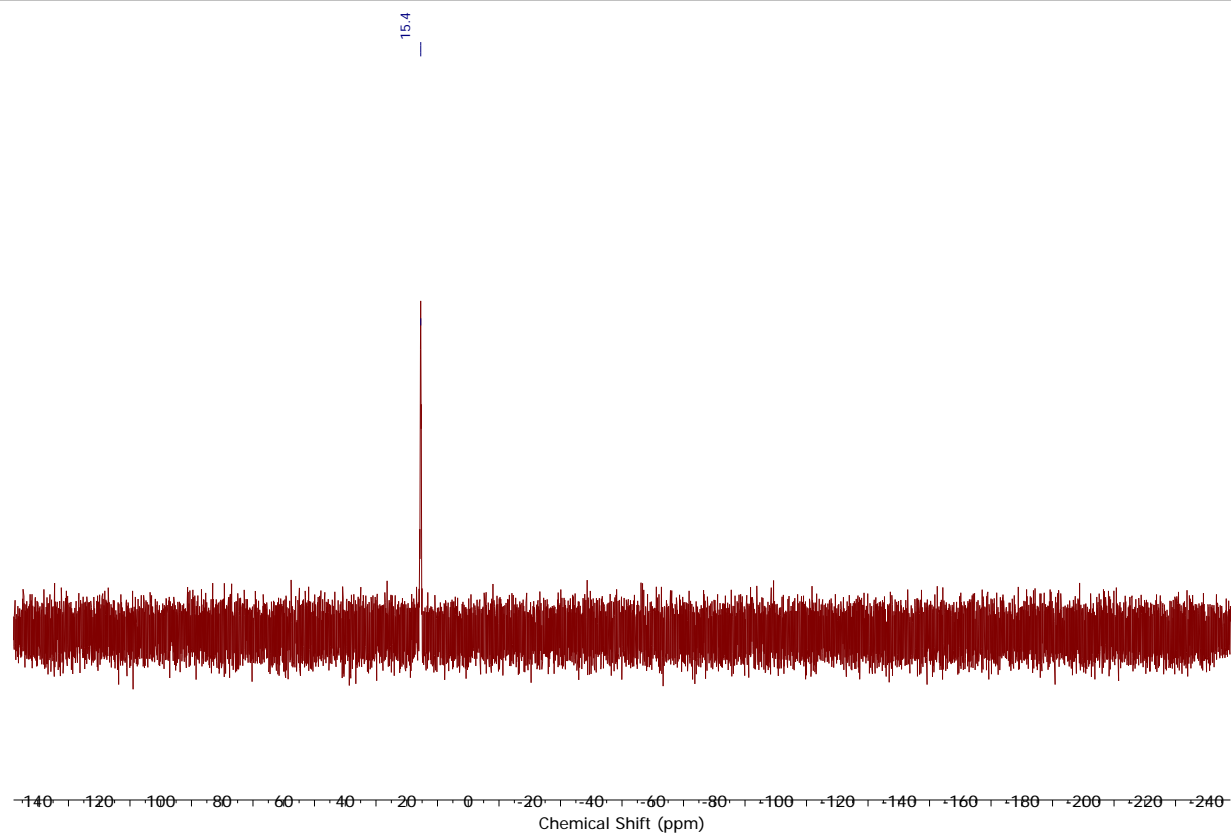

**Figure S70.**  $^{31}\text{P}$  NMR spectrum (162 MHz, Acetone- $d_6$ ) of **Ir4**.

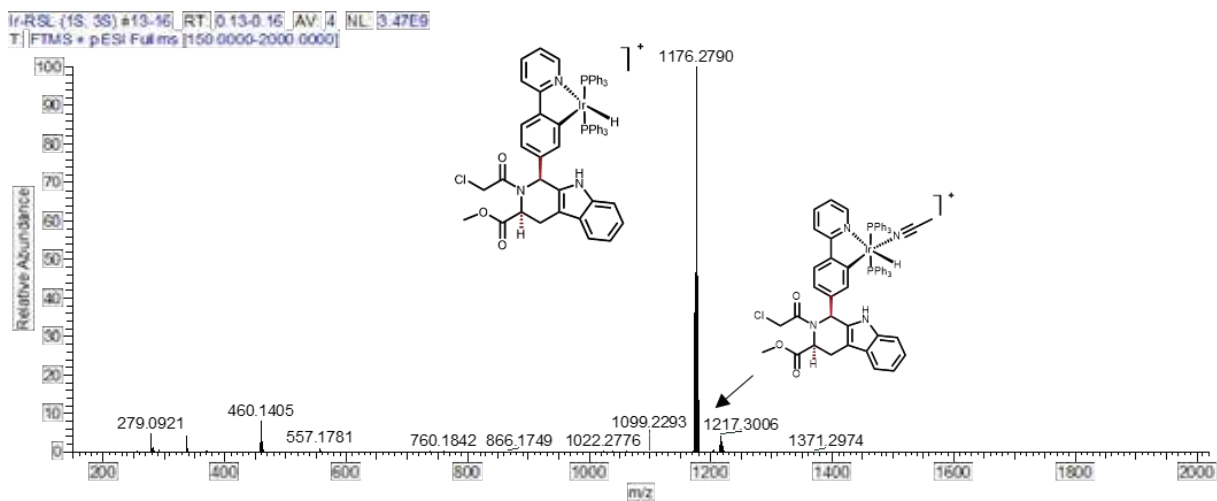

**Figure S71.** HRMS (solvent: MeCN) spectrum of **Ir4**.

# SUPPORTING INFORMATION

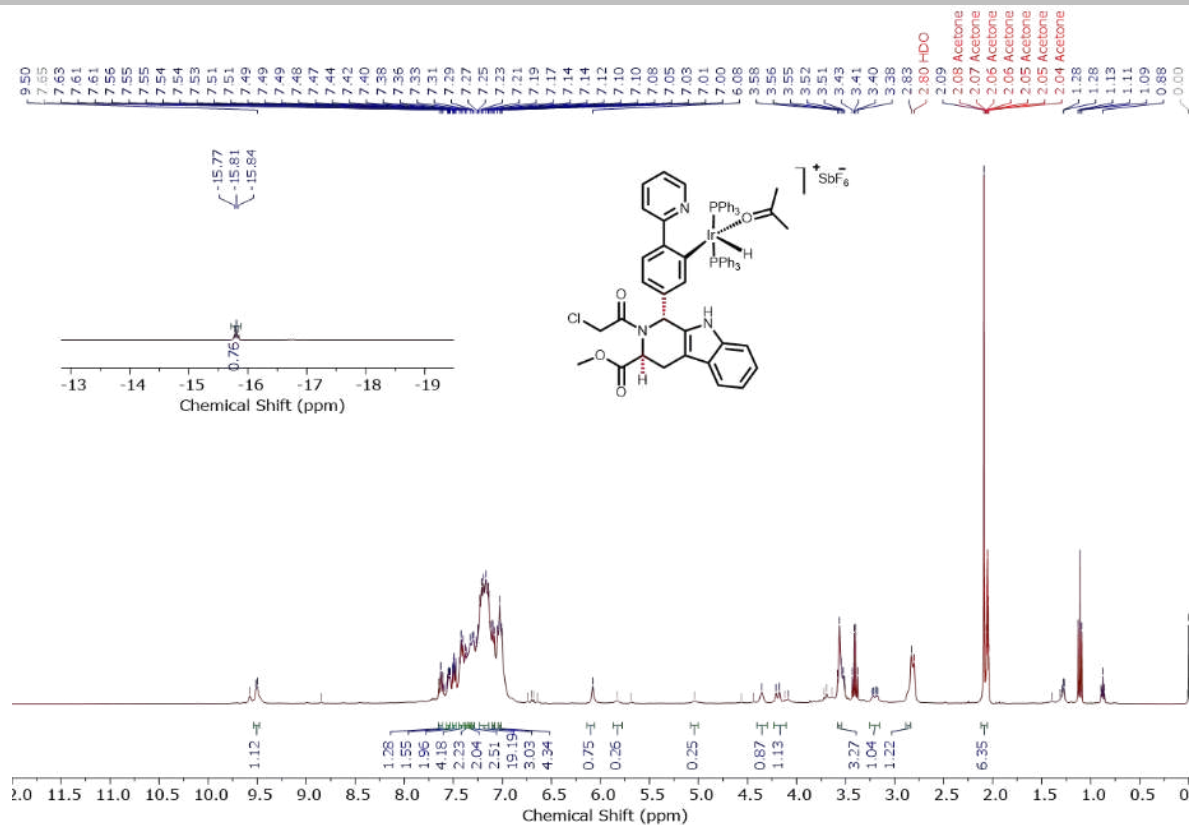

Figure S72. <sup>1</sup>H NMR spectrum (400 MHz, Acetone-d<sub>6</sub>) of Ir3.

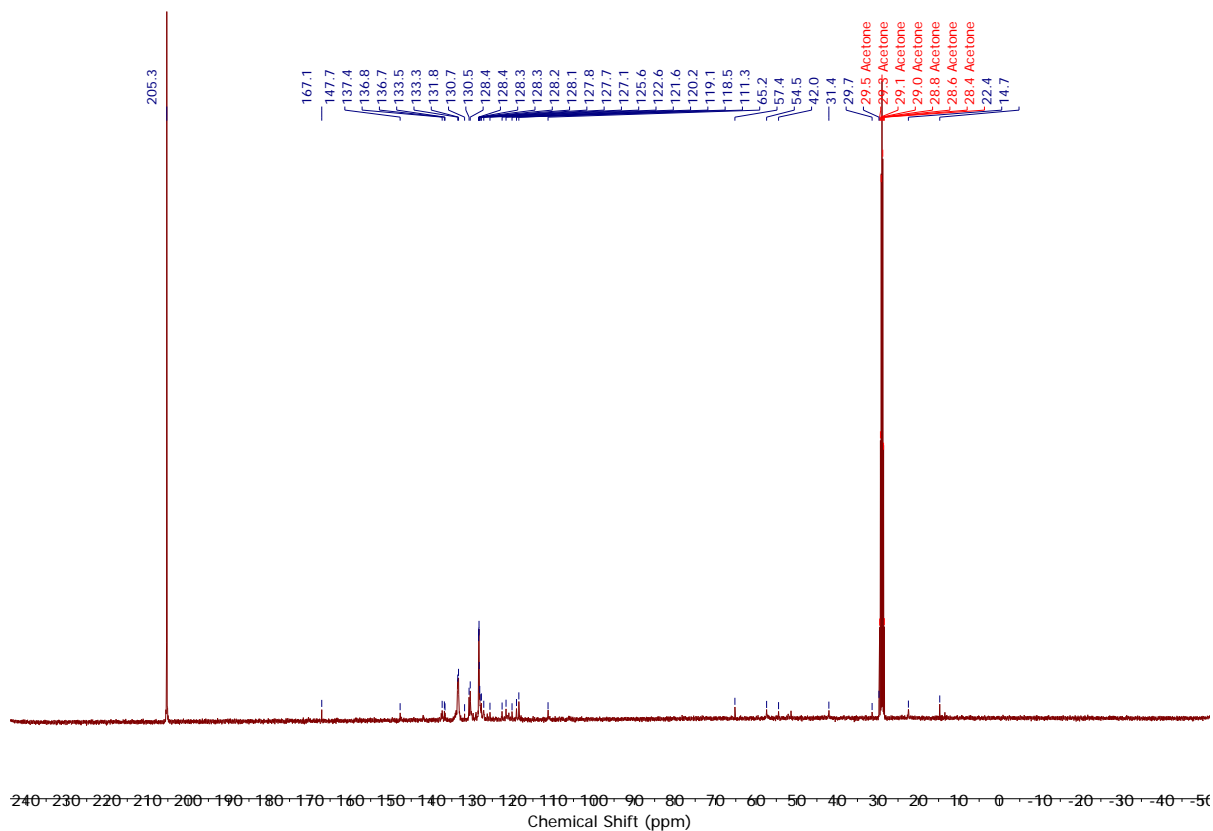

Figure S73. <sup>13</sup>C NMR spectrum (101 MHz, Acetone-d<sub>6</sub>) of Ir3.

# SUPPORTING INFORMATION

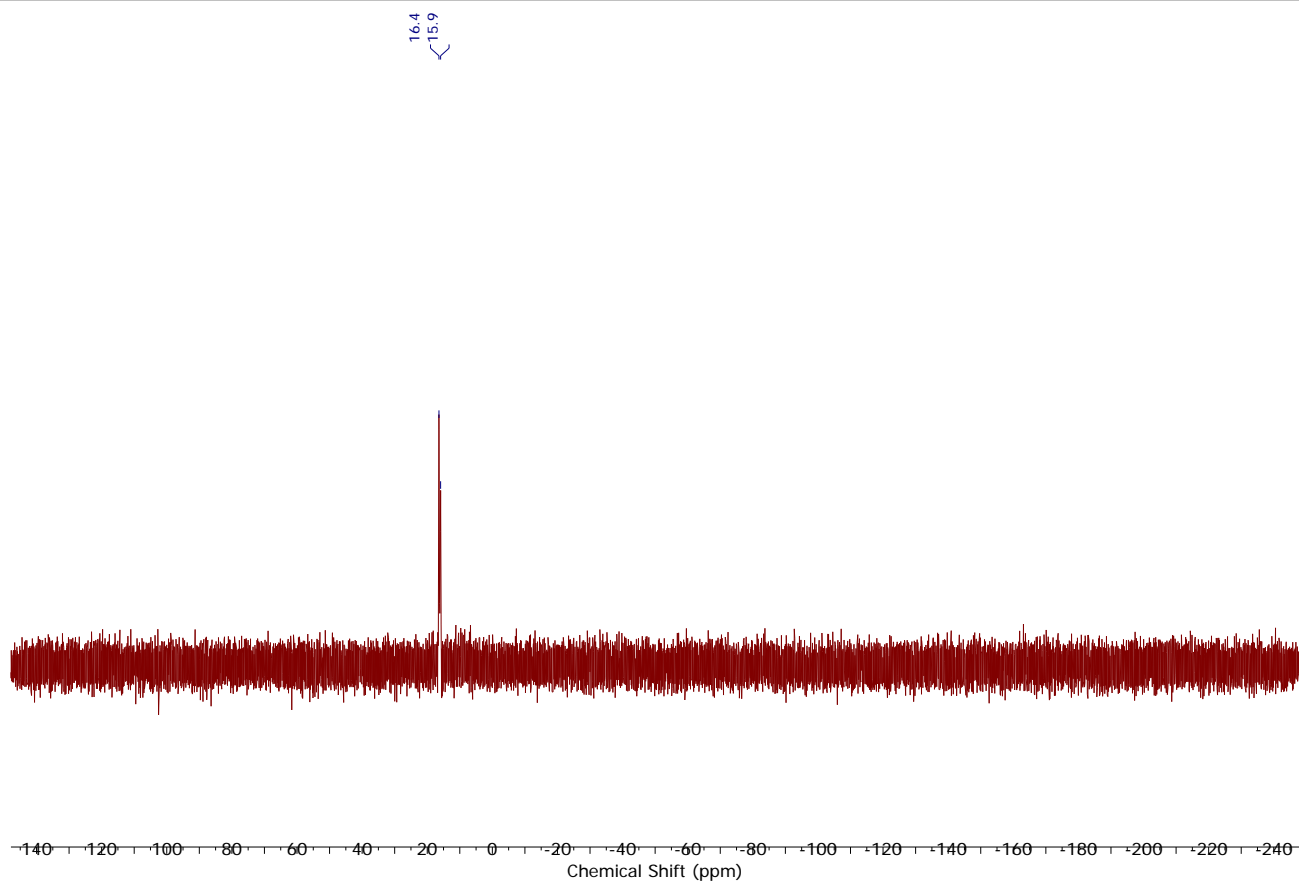

**Figure S72.**  $^{31}\text{P}$  NMR spectrum (162 MHz, Acetone- $d_6$ ) of **Ir3**.

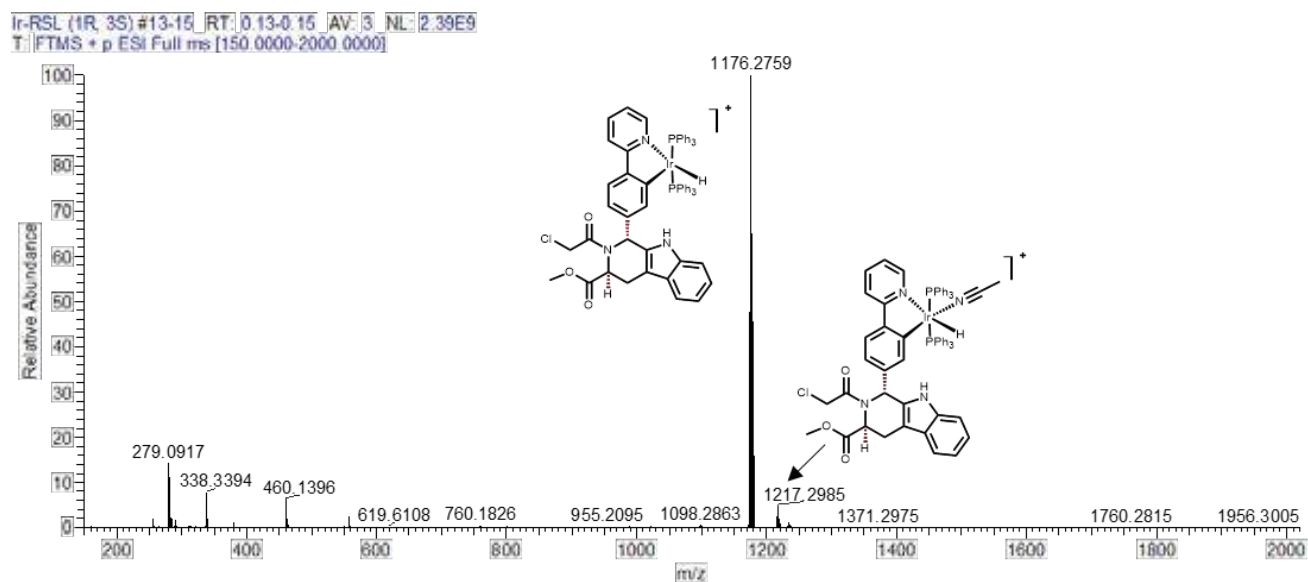

**Figure S74.** HRMS (solvent: MeCN) spectrum of **Ir3**.

### References

- [1] X. Song, Y. Qian, R. Ben, X. Lu, H.-L. Zhu, H. Chao, J. Zhao, *J. Med. Chem.* **2013**, *56*, 6531-6535.
- [2] W. S. Yang, R. SriRamaratnam, M. E. Welsch, K. Shimada, R. Skouta, V. S. Viswanathan, J. H. Cheah, P. A. Clemons, A. F. Shamji, C. B. Clish, L. M. Brown, A. W. Girotti, V. W. Cornish, S. L. Schreiber, B. R. Stockwell, *Cell* **2014**, *156*, 317-331.
